**Corporate activities that influence population health:  
A scoping review and qualitative synthesis to develop  
the HEALTH-CORP typology**

Raquel Burgess, MPhil MSc<sup>1</sup>; Kate Nyhan, MLS<sup>2</sup>; Nicholas Freudenberg, MPH DrPH<sup>3</sup>; Yusuf Ransome, MPH DrPH<sup>1</sup>

<sup>1</sup>Department of Social and Behavioral Sciences, Yale School of Public Health, 60 College Street, New Haven, Connecticut 06510, United States of America

<sup>2</sup>Harvey Cushing/John Hay Whitney Medical Library, Yale University, 333 Cedar Street, New Haven, Connecticut 06510, United States of America; Department of Environmental Health Sciences, Yale School of Public Health, 60 College Street, New Haven, Connecticut 06510, United States of America

<sup>3</sup>Department of Community Health and Social Sciences, CUNY Graduate School of Public Health & Health Policy, 55 W 125<sup>th</sup> Street, New York City, New York 10027, United States of America

Corresponding Author:

Raquel Burgess, MSc MPhil  
Dept of Social and Behavioral Sciences  
Yale School of Public Health  
60 College St, New Haven CT 06510  
[Raquel.burgess@yale.edu](mailto:Raquel.burgess@yale.edu)

**Introduction:** The concept of the commercial determinants of health (CDH) is used to study the actions (and associated structures) of commercial entities that influence population health and health equity. The aim of this study was to develop a typology that describes the diverse set of activities through which corporations influence population health and health equity across industries.

**Methods:** We conducted a scoping review of articles using CDH terms (n=116) that discuss corporate activities that can influence population health and health equity across 16 industries. We used the qualitative constant comparison method to build a typology called the Corporate Influences on Population Health (HEALTH-CORP) typology.

**Results:** The HEALTH-CORP typology identifies 70 corporate activities that can influence health across industries and categorizes them into seven domains of corporate influence (e.g., political practices, employment practices). We present a model that situates these domains based on their proximity to health outcomes and identify five population groups (e.g., workers, local communities) to consider when evaluating corporate health impacts.

**Discussion:** The HEALTH-CORP typology facilitates an understanding of the diverse set of corporate activities that can influence population health and the population groups affected by these activities. We discuss the utility of these contributions in terms of identifying interventions to address the CDH and advancing efforts to measure and monitor the CDH. We

also leverage our findings to identify key gaps in CDH literature and suggest avenues for future research.

**List of abbreviations:**

CDH: Commercial determinants of health

SDH: Social determinants of health

HEALTH-CORP: Corporate Influences on Population Health

PRISMA-ScR: PRISMA Extension for Scoping Reviews

CSR: Corporate Social Responsibility

CDC: Centers for Disease Control and Prevention

HICs: High-income countries

LMICs: Low- and middle-income countries

F&B: Food and beverage

## Introduction

For centuries, commercial actors and the structures that govern them have shaped the health of various populations in profound ways [1]. Growing attention to this influence recognizes the increasing economic, political, and legal power wielded by corporations, especially those that operate transnationally. In the past two decades, scholars have studied this issue through the lens of the ‘commercial determinants of health’ (CDH). In a recent *Lancet*-commissioned series on the topic, the CDH were defined as “the systems, practices, and pathways through which commercial actors drive health and equity” [2].

Gilmore and colleagues [2] provide us with a detailed summary of the CDH literature to-date and proposed a conceptual model for understanding how the CDH influence population health outcomes. Drawing on existing models of the political and social determinants of health (SDH), their model highlights the ways that corporate practices (e.g., political practices, financial practices) exert influence on the political and economic system, which have downstream impacts on SDH such as housing, labour, as well as on the natural environment. Gilmore and colleagues highlight how the maldistribution of power between the private and public sector creates current “pathological” economic and political systems that favour the interests of commercial entities, often at the expense of health and equity [2].

We conducted a scoping review and qualitative synthesis of 116 CDH articles discussing corporate activities with the potential to influence population health and health equity.

Leveraging the findings from this process, we offer three distinct contributions that add to existing literature [2–8]. First, we develop a typology (called the Corporate Influences on Health (HEALTH-CORP) typology) that identifies 70 specific corporate activities with the potential to influence human health across industries and categorizes these activities into seven domains of corporate influence (e.g., political practices, products and services). Second, we situate the domains based on their proximity to health outcomes (i.e., distal to proximal) and propose five population groups to consider when evaluating the health impact of corporate practices. Our third contribution is to use our findings to illuminate current gaps in CDH research.

In the following sections, we report our review methods and describe how we used the literature to build the HEALTH-CORP typology. We summarize the activities we identified as relevant to the seven domains of influence and five population groups. We conclude by discussing the utility of these contributions and identifying avenues for future CDH research.

## Methods

We used scoping review methodology to find relevant literature and qualitative synthesis to build the typology. Scoping review methodology is preferred when examining emerging fields of research and consolidating key factors related to a particular concept [9]. Likewise, qualitative synthesis is useful for systematically interpreting research to identify and represent its meaning [10]. We report our methods and findings in accordance with the PRISMA extension for scoping reviews (PRISMA-ScR) [11]. No study protocol was registered.

## Search strategy

We consulted prior work by de Lacy-Vawdon and Livingstone [12] to build our search. We expanded the scope of prior searches for CDH terms ((commercial OR corporate) AND determinant\* AND (health OR disease\*)), to include related terms such as “corporate political activity” and “morbidity” (Additional File 1, Appendix 1). At the full-text screening stage, we then excluded articles that did not specifically mention CDH terms (i.e., “commercial determinants”, “corporate determinant(s)”). The purpose was to identify as many related articles as possible, including those that did not use CDH terms in their title, abstract, or keywords, but nevertheless used CDH terms in the full text. We searched Scopus, OVID Medline, Ovid Embase, and Ovid Global Health with no date restrictions on Jan 4, 2022 and again on Sept 13, 2022.

## Eligibility criteria

Eligible articles described activities (i.e., decisions, strategies, or other actions) that corporations or those acting on behalf of corporations engage in that have been demonstrated to or have the potential to influence population health and/or health equity. This criterion was applied broadly to identify as many relevant activities as possible; the potential to influence population health and/or health equity could have been investigated explicitly within the respective study, supported by previous research (for e.g., changes to income are known to influence health), or reasonably be expected to influence population health (e.g., delayed

implementation of evidence-based health policy due to corporate influence). Moreover, the expected impact on health could be direct (e.g., occupational injury), indirect (e.g., decreased health protections due to corporate lobbying), health-promoting (e.g., provision of income), or health-adverse (e.g., harmful product), or some combination of these categories.

Articles were excluded if the full text was not available in English and if the title, abstract, keywords, or full text did not contain CDH terms (excluding the reference list). Full-length books were also excluded.

## Screening

Following manual and software-assisted (via Mendeley [13] reference management software) de-duplication, the first author (R.B.) screened the titles and abstracts in Rayyan [14], a web service for organizing reviews. We did not employ double, independent screening for verification purposes. Full texts were retrieved for eligible records. Then, EndNote's [15] 'Smart Group' feature was used to screen for articles that use CDH terms.

## Data analysis

Using the qualitative data analysis software NVivo 12 [16], the first author (R.B) employed the constant comparative method to inductively code the data with the goal of identifying relevant corporate activities and arranging them into overarching descriptive domains [17,18]. Specifically, examples of corporate activities discussed in the included texts (e.g., corporate

involvement in nutrition education in schools [19]) were coded and compared to other relevant examples (e.g., corporate provision of resources on breastfeeding for mothers [20]), to identify overarching activities (e.g., corporate involvement in health education directed at the public). These activities were then grouped into larger descriptive categories (e.g., preference and perception shaping practices), which we call ‘domains of corporate influence’. In the final typology, specific activities were included if they had been described in a general sense in the included literature or discussed in relation to two or more industries.

Drawing on the findings of this analysis, other CDH work [2,3,6,7], and the work of relevant civil society organizations [21,22], the first author (R.B.) then developed a model to describe the interdependencies between domains and their proximity to health outcomes in consultation with the third author (N.F.). This included identifying five population groups whose health is affected by corporate activities (i.e., consumers, workers, disadvantaged groups, vulnerable groups, and local communities).

# **Critical appraisal**

Consistent with scoping review methodology [23], a formal quality assessment of articles was not performed.



## Results

### Article Screening

7910 records were identified during the initial search, 4924 of which remained after de-duplication. Following title and abstract screening, 430 full texts were sought and 412 were found. 248 articles were excluded based on screening for use of CDH terms. Of the remaining 164 articles, 74 were included. Another 42 articles were included when the search was conducted a second time for a total of 116 included articles (Figure 1).

### Characteristics of Included Articles

Almost half of the articles included were conceptual (50 articles; 43%) and a substantial proportion employed qualitative methods (37; 32%). Fifty eight percent (67 articles) focused on the food and beverage, tobacco, and alcohol industries, with less research dedicated to studying other industries (e.g., social media, gambling, fossil fuels). Of the 58 included articles that reported a regional focus, 72% (42 articles) studied corporate activities in high-income countries (HICs), such as United States, United Kingdom, or Australia. Detailed descriptions of the characteristics of the included literature are reported in our previous work [24]. Individual article characteristics are provided in Additional File 1, Appendix 2.

**Figure 1. PRISMA Diagram**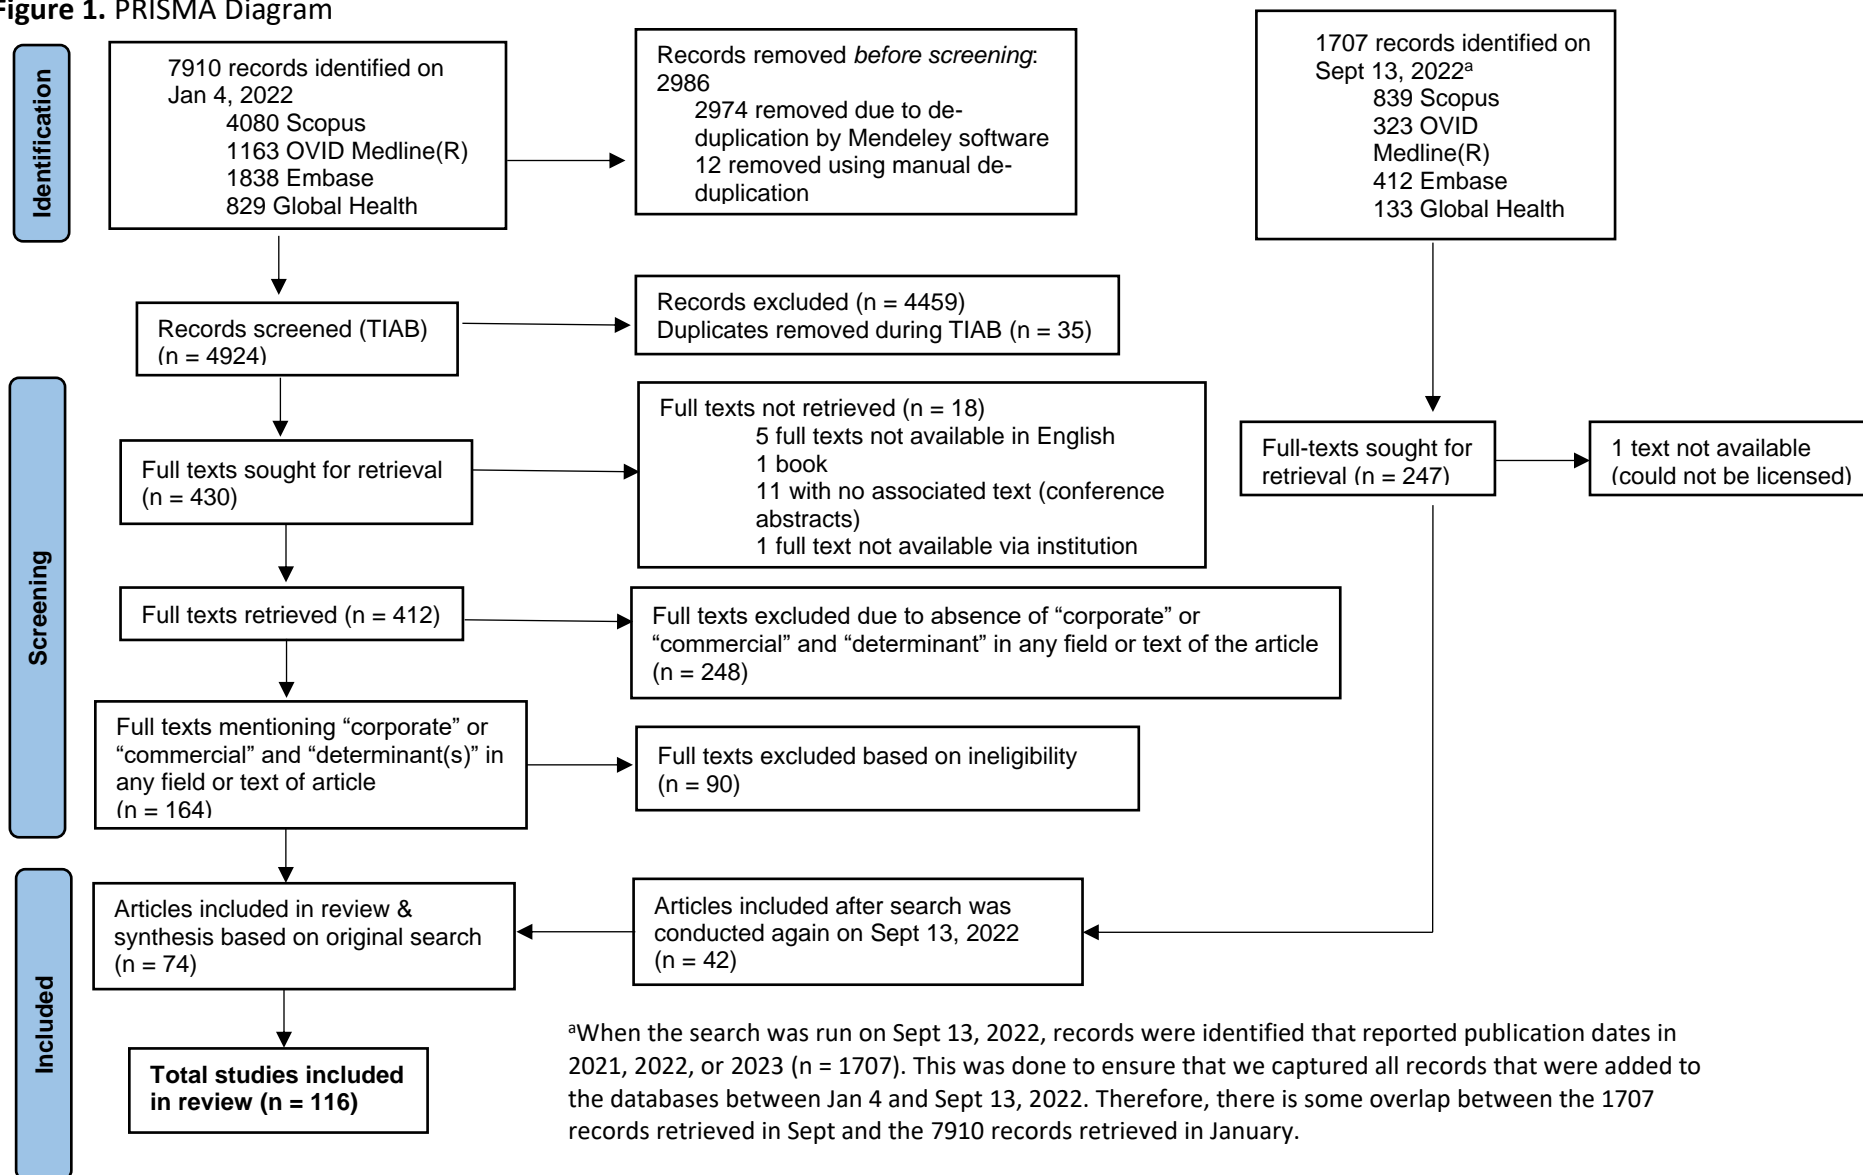

## Corporate Influences on Population Health (HEALTH-CORP)

We identified seven domains of corporate influence, which are: 1) political practices, 2) preference and perception shaping practices, 3) corporate social responsibility practices, 4) economic practices, 5) products & services, 6) employment practices, and 7) environmental practices (Table 1).

In Figure 2, we provide a graphical depiction of the domains. We showed that several domains overlap and are interactive (portrayed by positioning the domains in boxes without inter-domain boundaries). For example, some activities (e.g., ‘engage in efforts to influence the public’s perception of health policies’) contain elements of both preference and perception shaping practices and political strategies (overlapping). Other activities (e.g., obscuring conflicts of interest in research) could strengthen activities in other domains (e.g., misrepresenting evidence in policy submissions) (interactive).

Political practices, preference & perception shaping practices, and economic practices are positioned as distal domains (i.e., their impact on population health is indirect). Employment practices, products and services, and environmental practices are positioned as proximal domains (i.e., their impact on population health is direct). A double-headed arrow between the proximal and distal domains suggest that the distal domains enable the proximal domains and the proximal domains reinforce the distal domains. That is, by shaping the political, normative, epistemic, and economic environment in favourable ways, corporations are able to influence the conditions in which they operate (e.g., the environmental impacts for which they are held

accountable) [2]. In turn, the proximal domains can simultaneously influence the extent to which commercial entities can engage in the distal domains. For example, transnational companies can leverage their employment of large numbers of people (employment practices) to impose pressure on political and judicial processes (political practices), as was the case with the SNC-Lavalin scandal in Canada in 2019 [25]. Likewise, pharmaceutical companies were able to leverage their production of necessary products to advocate for reduced liability for product-related harms in the United States [26].

Finally, based on our review of the literature and other relevant sources [21,22], we identified five broad population groups that have been consistently studied to assess the impact of corporate activities on population health. These are consumers, workers, disadvantaged groups, vulnerable groups, and local communities located near a production or processing facility (Table 2). These five overlapping groups and the activities that influence their health are described in the section ‘Health Impact on Populations’.

In the next section, we describe the activities that comprise each domain and report the ways these activities were discussed in the included literature. The number of references pertaining to a specific activity should not be interpreted as an indication of the strength of associated evidence, but rather the number of instances the respective activity was discussed in the included articles. Our descriptions of the activities in the political and preference and perception shaping practices domains are brief as these practices have been discussed in detail elsewhere [3,4,6,7]. The HEALTH-CORP typology is presented in Table 2 (see end of document) and an expanded version with additional details is provided in Additional File 1, Appendix 3.

**Figure 2.** A Model Depicting the Domains of Corporate Influence, their Proximity to Health Outcomes, and the Relevant Population Groups

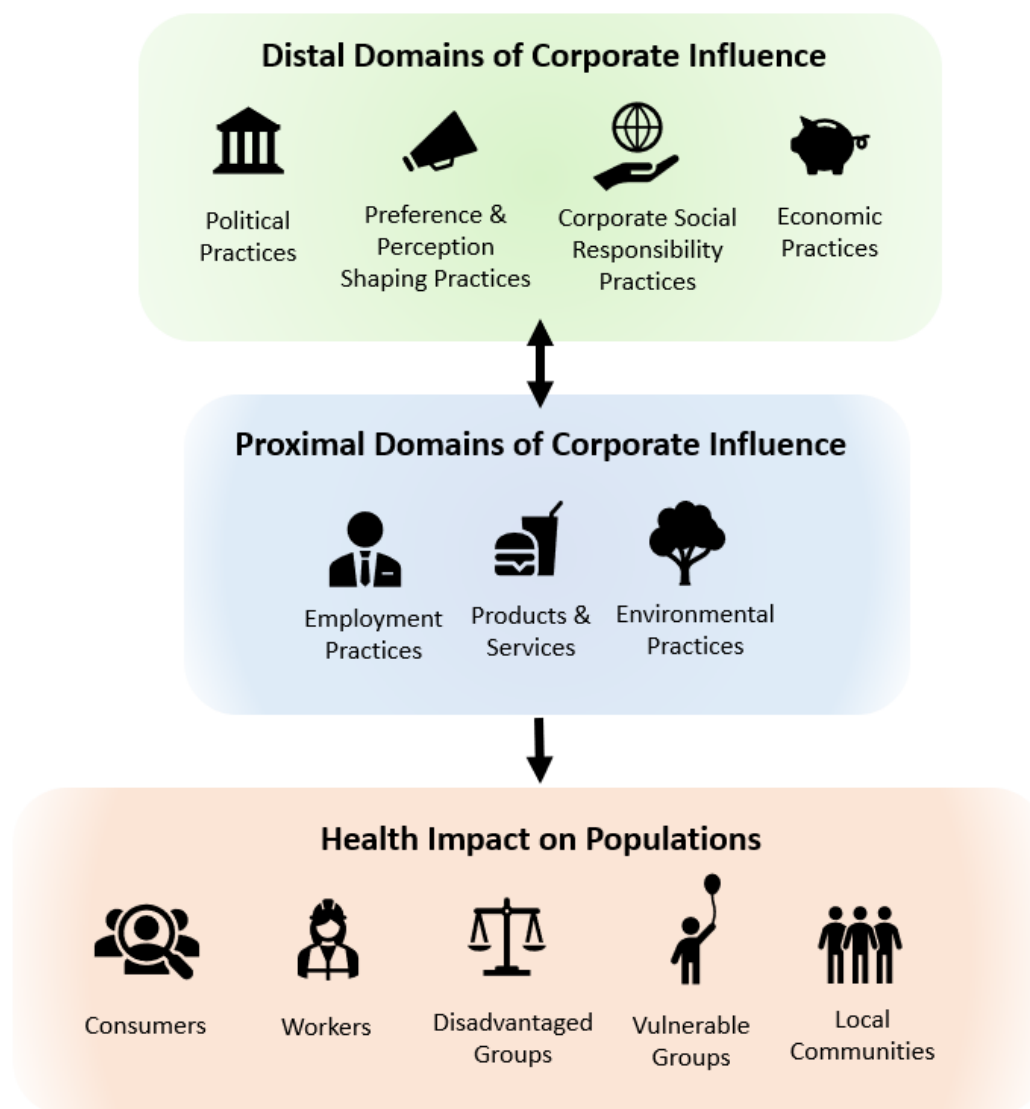

**Table 1.** Definitions of Domains of Corporate Influence

| Domains of Corporate Influence                                                                                                 | Definition                                                                                                                                                                           |
|--------------------------------------------------------------------------------------------------------------------------------|--------------------------------------------------------------------------------------------------------------------------------------------------------------------------------------|
| Political Practices<br>                       | This domain consists of activities undertaken to influence government policy or processes in ways that are favourable to the commercial entity [6].                                  |
| Preference & Perception Shaping Practices<br> | This domain consists of activities that shape preferences for products and/or influence perceptions about products and their health-related harms [6].                               |
| Corporate Social Responsibility Practices<br> | This domain consists of activities undertaken with the stated intention to contribute to society and/or offset environmental, social, or health impacts of previous activities [27]. |
| Economic Practices<br>                        | This domain consists of activities that influence the economy and the distribution of wealth within society [8].                                                                     |
| Products & Services<br>                       | This domain consists of activities related to the production and sale of products and services [28].                                                                                 |
| Employment Practices<br>                    | This domain consists of activities related to the conditions under which employment is provided [29].                                                                                |
| Environmental Practices<br>                 | This domain consists of activities that can influence physical and/or mental health through the impact of the activity on the natural environment [30].                              |

## Distal Domains of Corporate Influence

### *Political Practices*

Corporate involvement in the development and implementation of health policy was a significant focus of many of the included articles and a wide range of corporate strategies were discussed. Corporations were reported to engage in efforts to secure a favourable policy environment, for instance, by contributing to political parties [12,18,20,31–44] and developing relationships with public health institutions [20,27,32,37,45–51]. For example, Maani and colleagues [46] used Freedom of Information Act Requests to access emails between *the Coca Cola Company* and the *Centers for Disease Control and Prevention* (CDC). They demonstrated that *Coca Cola* successfully built a relationship with a senior CDC official, which they leveraged in an attempt to avoid restrictions on sugar-sweetened beverages supported by the *World Health Organization*.

Corporate strategies to stop, delay, or weaken proposed health policies were also frequently discussed. For example, corporations were reported to push for self-regulation schemes [12,18,20,27,31,32,39,49,51–68] and to threaten litigation and/or use existing trade treaties to challenge proposed health legislation [19,67,69–74]. They were reported to engage in a wide breadth of argumentative strategies to challenge proposed health policies. For example, corporations suggested that policies were redundant, conflicting, or misaligned with other regulations or international norms [45,49,52–54,69,75]. Arguments about the impacts of the policy on the economy, employment, equity, and poverty were also common [19,20,31,52–

55,63,65,67,71,74,76–80], and economic arguments were considered to be particularly persuasive in low-and-middle income countries (LMICs) [19,67,74]. Many articles also discussed the use of front groups as a way to distance the corporation from its unsavoury activities (e.g., lobbying against health policies) [18,19,32,42,44,48,52,59,63,72,74,81–83].

### *Preference & Perception Shaping Practices*

The ways in which corporations shape preferences for products and influence perceptions about their health-related risks was another major topic of the included articles. Corporations were accused of promoting excessive consumption of harmful products, for example, by engaging in intensive and highly-resourced marketing campaigns that normalize their consumption (e.g., portraying alcohol as part of a normal everyday routine [84]) [12,18,36,42,47,51,63,65,72–74,84–99]. They were reported to influence the public debate about product related-risks by reframing and creating uncertainty about the causes of health issues (e.g., focusing on genetic causes of cancer as opposed to alcohol consumption [100]) [18,20,27,28,31,32,34,36,37,40–42,44,46,48,50–52,56–58,64,65,75,76,79,81,101–104] and acquiring or funding media companies, making it more difficult for public health messages to be heard [20,45,48,49,65,72]. Though commercial entities promoted education as the solution to managing health-related risks [20,45,51,58,66,68,74,80], they were also accused of attempting to shape the public’s understanding of health issues by providing educational resources that promoted their products and/or downplayed the associated health risks (e.g., alcohol [61,62]) [19,20,36,51,63,65,68,80,84,100].



Similarly, commercial actors were accused of promoting products to health professionals by, for example, delivering educational initiatives to health professionals (e.g., the breast-milk substitute (BMS) industry's funding of medical student retreats [42]) [18–20,49,51,65,80] and influencing the development of clinical standards (e.g., BMS industry's funding of clinical guidelines for the diagnosis of cows-milk protein allergy [91]) [48,78,91,97,105]. Corporations were also reported to influence the academic debate and the production of science by, for example, by funding universities, think tanks, and scientific conferences, providing scientific awards, developing industry research institutes and suppressing research that is not aligned with their interests (e.g., failing to publish research on health harms of products) [19,20,32,42,46,48,49,51,64,66–68,72,75,80].

### *Corporate Social Responsibility (CSR) Practices*

CSR initiatives mentioned in the literature include corporate involvement in health promotion programs and contributions to health charities and causes (e.g., tobacco industry's funding of HIV initiatives [44]; alcohol industry's involvement in road safety [37]) [18,19,27,37,39,42,44,51,67,72,91,97,106], some of which had limited evidence of effectiveness [18,27,39,44,72]. Others described CSR initiatives that have implications for health (e.g., diversity, equity, and inclusion efforts) [19,27,39,44,67,68]. Corporations were sometimes reported to exploit existing social movements (e.g., women's rights [61]) to sell products [27,50,61] or engage in product reformulation (e.g., 'light' cigarettes [48]) to suggest that the company is taking action on product-related harms [12,18,36,51,68,92].

Overall, CSR was perceived critically and was seen as being closely related to political practices and preference and perception shaping practices. That is, CSR efforts were seen as attempts to distract from corporate harms [12,18,27,44,48,75,107], shift blame [68,75], enhance brand image and credibility [19,36,44,67,84], influence policymaking [19,37,44,48,68,71], and/or preemptively address threats to business practices [55]. In some cases, these strategic uses of CSR were described by corporations in leaked company documents [48]. Millar [62] suggested that ‘good’ corporations engage in CSR efforts genuinely.

### *Economic Practices*

Externalization of health harms, for example, through tax avoidance [1,36,38,40,41,43,48,62,65,72,86,107–109], was another major topic of the included articles. In this way, corporations were reported to impose health harms onto populations (e.g., chronic disease) without paying for the full cost of these harms. Large monopolies were seen as harmful because they concentrate economic power in one or a few actors, leading to more powerful lobbying efforts [43]. Mendly-Zambo, Raphael, & Taman [106] also discussed the price fixing tactics of *Walmart Canada* and its contributions to food insecurity. Millar [62] described how ‘good’ corporations pay their fair share of taxes and contribute to economic growth.

## **Proximal Domain of Corporate Influence**

### *Products and Services*

Several products (e.g., alcohol, tobacco, and gambling machines) were widely recognized as promoting harm. Many authors discussing products referred to their wide availability and accessibility [36,74,88,98,110,111]. For example, the ubiquity of fast-food outlets and the provision of free BMS in clinics was seen as increasing consumption of these products [36,74,88,110,111]. The features of products were also discussed, such as the hyper-palatable nature of ultra-processed foods [93] and the hyper-engagement features of social media (e.g., endless scroll) [64], which were seen as promoting behaviour some authors described as addictive. Liber [112] discussed some health-promoting products (e.g., vaccines) and suggested that regulation focus on expanding these markets while contracting the markets for health-harming products (e.g., alcohol).

### *Employment Practices*

Employment practices were not discussed in depth in the included articles. Most articles that discussed employment did so in passing, with reference to health harming practices such as unsafe working conditions, inadequate pay, and limited access to benefits (e.g., parental leave, medical care) [1,12,18,40,41,43,62,65,79,106,113]. Loewenson [113] provided the deepest discussion of employment by describing the global trend towards precarious labour and associated health effects such as social isolation, high blood pressure, and mental ill-health. Mendly-Zambo, Raphael, and Taman [106] described how *Walmart Canada's* employment

practices (e.g., low wages, anti-union activities) contributed to food insecurity in Canada. In contrast, Millar [62] suggested that ‘good’ businesses create jobs that can have a beneficial effect on human health and described health-promoting activities such as adequate workplace mental health policies.

# *Environmental Practices*

Health concerns related to environmental practices were not also not a significant topic of the included articles. Activities that were mentioned include chemical and pesticide use, air and water pollution, land clearing/deforestation, ecosystem disruption, consumption of energy and water, production of waste, contributions to greenhouse gases, and contributions to biodiversity loss [1,12,43,62,65,79]. Kadandale, Marten, and Smith [79] described how slash-and-burn land clearing practices used by the palm oil industry created episodes of harmful haze in South-East Asia, which led to thousands of premature deaths and increases in the rates of respiratory, eye, and skin diseases. Montiel [114] described the health harms of deforestation by pointing to reports that land clearing in Indonesia by the palm oil and sugar industries led to the emergence of the Nipah virus through zoonosis (transfer of a virus from animals to humans).

**Health Impact on Populations**

Guided by the literature, we describe the domains which are relevant to each of the five identified population groups (Table 3). We also describe specific activities relevant to each group that were discussed within the included literature.

**Table 3.** Population Groups Affected by Corporate Activities

| Group Whose Health is Impacted                                                                                     | Definition of Group                                                                                                                                                                                                                                                                     |
|--------------------------------------------------------------------------------------------------------------------|-----------------------------------------------------------------------------------------------------------------------------------------------------------------------------------------------------------------------------------------------------------------------------------------|
| <b>Consumers</b><br>              | Consumers are defined as individuals who buy goods or services produced and/or sold by commercial entities [115].                                                                                                                                                                       |
| <b>Workers</b><br>              | Workers are defined as individuals who are employed (permanently, contractually, or otherwise) for commercial entities or within their supply chain [116].                                                                                                                              |
| <b>Disadvantaged Groups</b><br> | Disadvantaged populations are defined as individuals who are socially, economically, or culturally disadvantaged due to current and/or historical factors (e.g., people of colour, Indigenous populations, migrant populations, women, individuals of low socioeconomic status,) [117]. |
| <b>Vulnerable Groups</b><br>    | Vulnerable groups are defined as groups that are vulnerable due to their age, life stage, or other factors (e.g., children, pregnant persons, older adults, people with disabilities) [21].                                                                                             |
| <b>Local Communities</b><br>    | Local communities are defined as persons living in communities in which corporations are operating (i.e., those affected by physical proximity to corporate operations) [8].                                                                                                            |

## Consumers

Consumers, by their nature, are influenced by the properties of consumer goods (products and services). Political and preference and perception shaping practices influence consumers' health indirectly by creating and shaping the markets for these goods. For example, aggressive marketing can increase the demand for harmful products (e.g., ultra-processed foods) while lobbying and political financing may limit associated protections (e.g., nutrition labelling [49]).

## Workers

The activities influencing the health of workers are, unsurprisingly, those identified in the employment practices domain. These activities shape the opportunities the worker has to obtain optimal health (e.g., access to medical benefits) and their exposure to harmful or salutogenic factors (e.g., pesticides, positive work environments) [118]. Some political practices (e.g., threatening to shift operations to a country with weaker labour standards) may also impact workers (i.e., through placing downward pressure on labour regulations).

## Disadvantaged Groups

Disadvantaged groups are more likely to be employed in precarious and unsafe jobs [119] and therefore are likely to be strongly affected by employment practices. These groups may also experience the greatest burden from economic practices such as unfair tax practices that

reduce funds for social programs. Environmental practices and preference and perception

shaping practices are also relevant to these groups [120,121].

Specific activities described in the literature include disproportionate marketing of unhealthy

commodities (e.g., alcohol) to disadvantaged populations [40,43,50,60,72,86,103,110,121–123]

and efforts to make unhealthy commodities appealing to women [61,95,98]. Millar described

increasing domestic income inequities because of large corporate profits which are distributed

amongst the elite, who also lobby for reduced taxation [62]. Some private sectors (e.g., the for-

profit prison industry, tobacco industry) were accused of placing undue burdens on certain

groups (e.g., Black Americans, Indigenous populations) [1,50,107,124–126]. Corporations were

reported to push for privatization, which was seen as widening inequities [62,127]. In some

cases, initiatives ostensibly undertaken to improve equity (i.e., efforts to diversify cannabis

industry employment) were seen as self-serving attempts to advance industry interests (e.g.,

increase consumption) [27].

Some articles also described corporate influences on global inequities, including the ‘downward

pressure’ on working conditions via corporations’ use of low-wage havens [40,41,113,114],

exploitation of the weaker regulatory structures of LMICs, the extraction of wealth from LMICs

to HICs [108,114], and the identification of LMICs as ‘emerging markets’ by unhealthy

commodity producers (e.g., tobacco) to replace declines in consumption in HICs

[36,40,43,72,128].

#### 494 *Vulnerable Groups*

495 The literature described vulnerable groups such as children and pregnant persons being  
 496 affected by products and associated marketing and educational techniques, as well as the  
 497 political practices that enable these marketing techniques. Specifically, the included literature  
 498 discussed food and beverage industry marketing directed towards children and involvement of  
 499 the industry in schools and other child-centered programming (e.g., distribution of branded  
 500 school supplies, development of nutrition educational programmes for children) [12,19,43,123].  
 501 Pregnant persons and mothers were mostly discussed in the context of the BMS industry and  
 502 relevant activities included marketing, industry sponsored educational resources, industry  
 503 interactions with health care professionals, and donations of BMS during emergencies (i.e.,  
 504 ‘crisis marketing’) [18,20,42,47,73,74,91,129]. Other vulnerable groups (e.g., the elderly or  
 505 people with disabilities) were not frequently discussed.

#### 506 *Local Communities*

507 The health outcomes of local communities are likely be most influenced by environmental and  
 508 employment practices, especially those occurring in the supply chain, which are enabled by  
 509 political practices. In the included literature, there was little discussion of specific activities that  
 510 may influence these communities. One activity that was discussed was the dislocation of local  
 511 communities [65,113] through, for example, the activities of the extractive industry [113]. This  
 512 dislocation was reported to lead to social exclusion, poor access to infrastructure, and  
 513 dependency on mining activities [113].



## Discussion

In this article, we reported on the development of the cross-industry HEALTH-CORP typology, which describes 70 health-relevant corporate activities that are categorized across seven domains of corporate influence. We presented a graphical model that situates these domains in relation to their proximity to health outcomes and identified five population groups whose health is influenced by corporate activities.

These contributions draw from and directly supplement previous work [2–8]. Prior typologies of corporate activities tend to be more narrowly focused on either one particular industry or group of industries [3–5,8,130] and/or a specific type of corporate practice (e.g., political practices) [4,28,131]. To the best of our knowledge, the HEALTH-CORP typology is the most comprehensive typology of health-relevant corporate activities to-date. This novel typology covers a diverse range of corporate activities that were identified based on literature pertaining to 16 different industries. The seven domains we identified are well-aligned with practices proposed by others [2,6,8], indicating agreement on the key corporate practices that require our attention within efforts to mitigate the CDH. The 70 activities identified in the HEALTH-CORP typology add to this work by more comprehensively identifying the array of different activities through which these practices are manifested.

The identification of these activities will support future efforts to measure and monitor corporate activities, a key priority for the CDH field [3,4,8]. Ongoing work by our team includes using the HEALTH-CORP typology to guide the development of a food and beverage (F&B) industry-specific rubric that can be later transformed into an index to measure, monitor, and

score individual F&B companies on the diverse set of activities through which they exert influences on health. These efforts, alongside other relevant efforts [21,132,133], will be critical to our ability to track changes in corporate activities over time and to quantitatively assess the impact of corporate activities on specific health outcomes, another priority for the CDH field [24].

The HEALTH-CORP typology may also assist public health professionals, socially minded investors, and civil society in identifying harmful corporate activities that can be targeted for intervention. To achieve meaningful wide-scale change on the CDH, we suggest prioritizing interventions that address distal CDH activities such as the deep integration of corporations into political, academic, and professional structures. For example, implementing regulations that allow industry to fund research but blinding them to the investigators conducting the work [134] may be one measure that could be used to address the power that corporations hold over the production and dissemination of science. By effectively addressing the distal CDH, we may see corollary ‘run-off’ benefits to proximal domains such as products & services (e.g., improved product safety).

Our identification of five population groups whose health is affected by corporate activities may also assist with identifying interventions that can be used to protect the health of specific priority population groups. For example, introducing limits on the number of advertisements for unhealthy commodities on Spanish-language television may help prevent disproportionate marketing of unhealthy goods to Hispanic individuals living in the United States [121]. As suggested by Baum and colleagues [8], the priority placed on different population groups (e.g.,

local communities versus consumers) and the associated interventions are likely to differ based on the specific characteristics of the particular country or region of interest [8].

Finally, our review and synthesis of a substantial number of CDH articles allowed us to identify key research gaps in the CDH literature. First, the included literature reported extensively on political and preference and perception shaping practices, providing countless examples of how these practices have been manifested in different scenarios. However, some of the proximal domains (i.e., employment practices, environmental practices) were explored only superficially. This gap may be limiting our ability to understand the complex interactions between different types of corporate practices and may also limit our ability to determine which corporate activities are most health-harming and therefore should be prioritized for intervention.

Fortunately, there are robust fields of existing public health research (e.g., environmental health, occupational health) that we can draw on to better understand these activities. Conducting collaborative work with occupational health, environmental health, and CDH scholars may lend fresh insights into these practices, their economic and political drivers, and the associated solutions.

Another gap is the limited investigation of the ways in which commercial entities influence the health of disadvantaged groups, vulnerable groups, and local communities. This may, in part, reflect the relative lack of CDH research on LMICs compared to HICs [reference to related manuscript]. Understanding the impact of corporate practices on these communities will be paramount to addressing domestic and global health inequities. Efforts to advance our understanding of these activities may be facilitated by the Corporate Health Impact Assessment

tool developed by Baum and colleagues [8], which can be used to conduct in-depth investigations of corporate practices within particular regions of interest. Researchers can also expand our understanding of the role of specific actors by conducting community-based participatory research [135] with communities of interest to better understand the corporate activities that most affect them and determine how individuals in these communities weigh positive impacts of corporate involvement in their community (e.g., employment) against negative impacts (e.g., water pollution).

## Limitations

We were able to review and synthesize 116 articles on the CDH across 16 industries to develop a fairly comprehensive typology of corporate activities that can influence health. We believe the HEALTH-CORP typology will be useful for advancing scholarship and practice on the CDH. However, the typology nor our associated model can completely explain the complex system through which commercial entities influence health. Moreover, other domains of corporate influence, such as corporate activities that exert influence over patterns of conflict and migration, may continue to emerge as CDH research advances.

We have focused on corporate actions in this article, rather than the systems and structures (e.g., neoliberalism) that drive these actions, or the influence of other actors (e.g., government) in co-creating these actions (e.g., privatization of services). The benefits of this approach are that actions are observable and observing them may lend insight into the associated structures. We included all activities that could be reasonably linked to human health; however, it was

beyond the scope of this review to assess the strength of evidence of the relationship of each activity to health.

Moreover, most of the included literature described corporate practices from a negative perspective that seemed to suggest that corporate actions are driven by profit-seeking and sometimes a willful neglect of the associated harms to health. In many cases (e.g., tobacco industry's attempts to sow doubt about the health harms of cigarettes), this perception may be accurate whereas in other cases (e.g., aggressive marketing) corporations may be driven by other factors inherent to our economic system (e.g., fiduciary duty to maximize profits and revenues). The proposed HEALTH-CORP model and typology (and CDH literature in general) may benefit from deeper consideration of the benefits some large companies provide to society that the current economic system facilitates (e.g., inexpensive goods manufactured efficiently at large-scales).

Our eligibility criteria did not include grey and non-English literature which may have improved the comprehensiveness of the HEALTH-CORP typology. Importantly, we also limited our review to articles that directly engaged with CDH terms, thereby excluding research that may describe health-relevant corporate practices without engaging with CDH concepts. We made this decision for feasibility purposes and because this strategy allowed us to identify key gaps in CDH literature, a contribution of this review.

## Conclusions

Scholarship on the CDH has documented the wide-ranging influence that corporate activities can have on population health. In this article, we make three contributions to the CDH literature. First, we developed the HEALTH-CORP typology, which describes 70 corporate activities that can influence population health across industries and categorizes these activities into seven domains of corporate influence. Second, we situate the domains based on their proximity to health outcomes and identify five population groups to consider when evaluating the health impact of corporate practices. Finally, we leverage our findings to reveal key gaps in CDH literature and recommend future avenues for CDH research. We believe these contributions will be useful for advancing public health research and practice related to the CDH.

634 **Table 2.** The Corporate Influences on Population Health (HEALTH-CORP) Typology, consisting of  
 635 seven domains and 70 activities.<sup>a</sup>  
 636

| DISTAL DOMAINS OF CORPORATE INFLUENCE                                                                  |  |
|--------------------------------------------------------------------------------------------------------|--|
| Political Practices                                                                                    |  |
| <i>Activities related to securing a favourable policy environment:</i>                                 |  |
| Political financing                                                                                    |  |
| Bribery                                                                                                |  |
| Advocate for policies to limit corporate liability for health harms                                    |  |
| Build relationships with public health institutions and/or other relevant groups                       |  |
| Advocate for placement of corporate representatives on relevant associations and boards                |  |
| Revolving doors                                                                                        |  |
| <i>Activities related to stopping, delaying, or weakening proposed health and related policies:</i>    |  |
| Legal action (or the threat thereof)                                                                   |  |
| Advocate for self-regulation, co-regulation, or voluntary codes                                        |  |
| Lobbying                                                                                               |  |
| Pre-emption tactics                                                                                    |  |
| Leverage trade and investment treaties                                                                 |  |
| Amplify influence via front groups or industry alliances/coalitions                                    |  |
| Argumentative strategies within policy submissions                                                     |  |
| Misrepresent evidence or demand unrealistic evidence within policy submissions                         |  |
| Exploit divisions in the public health community                                                       |  |
| Intimidate opponents                                                                                   |  |
| Shift or threaten to shift operations to regions with weaker labour regulations                        |  |
| <i>Other political activities:</i>                                                                     |  |
| Advocate for privatization of public services                                                          |  |
| Preference & Perception Shaping Practices                                                              |  |
| <i>Activities related to promoting products:</i>                                                       |  |
| Marketing                                                                                              |  |
| Disproportionate marketing of harmful products to disadvantaged groups                                 |  |
| Leverage pandemics/disasters, social movements to promote products                                     |  |
| Sponsor sports teams                                                                                   |  |
| <i>Activities related to shaping the public debate about products &amp; their health implications:</i> |  |
| Involvement in public educational initiatives                                                          |  |
| Conduct campaigns to influence the public's perception of health policies                              |  |
| Craft inaccurate or skewed narratives about health & disease                                           |  |

|                                                                                                                   |
|-------------------------------------------------------------------------------------------------------------------|
| Advance the ideas of individual responsibility and consumer choice                                                |
| Capture the media                                                                                                 |
| Use of experts to further industry interests                                                                      |
| <i>Activities related to shaping the professional debate about human health and nutrition:</i>                    |
| Fund professional associations                                                                                    |
| Involvement in the development of clinical standards                                                              |
| Involvement in educational initiatives for health care providers                                                  |
| <i>Activities related to shaping the production and interpretation of evidence:</i>                               |
| Fund external stakeholders to conduct and/or disseminate research                                                 |
| Suppress, amplify, or cherry-pick evidence or engage in agnogenesis                                               |
| Obscure conflicts of interest                                                                                     |
| Involvement in the development of scientific standards                                                            |
| Falsify data                                                                                                      |
| <b>Corporate Social Responsibility Practices</b>                                                                  |
| Develop or contribute to health promotion programs or health charities                                            |
| Develop or contribute to other social responsibility efforts relevant to health (e.g., diversity initiatives)     |
| Engage with existing social movements (e.g., women's rights)                                                      |
| Product reformulation                                                                                             |
| <b>Economic Practices</b>                                                                                         |
| Tax practices                                                                                                     |
| Price fixing                                                                                                      |
| Contribute to economic growth                                                                                     |
| Contribute to inequitable distributions of wealth and power (e.g., through ownership and remuneration structures) |
| <b>PROXIMAL DOMAINS</b>                                                                                           |
| <b>Products &amp; Services</b>                                                                                    |
| <i>Activities related to the characteristics of products:</i>                                                     |
| Harmful or salutogenic properties                                                                                 |
| Addictive properties                                                                                              |
| <i>Activities related to the accessibility of products:</i>                                                       |
| Price and use of price promotions/discounts/coupons                                                               |
| Physical proximity and availability of products to consumers                                                      |
| <b>Employment Practices</b>                                                                                       |
| <i>Activities related to the characteristics of employment:</i>                                                   |
| Number of employment opportunities                                                                                |
| Adequacy of pay                                                                                                   |



|                                                                        |
|------------------------------------------------------------------------|
| Stability of employment terms                                          |
| <i>Activities related to the benefits received through employment:</i> |
| Presence and quality of medical benefits                               |
| Presence and quality of pension plans                                  |
| Presence, length, and paid or unpaid status of parental leave          |
| Presence and quality of employee wellness programs                     |
| <i>Activities related to the conditions of employment:</i>             |
| Quality of working conditions                                          |
| Anti-union activities                                                  |
| Support for breastfeeding in the workplace                             |
| Opportunities to work remotely and characteristics of remote work      |
| <i>Other employment-related activities:</i>                            |
| Use of child or forced labour                                          |
| <b>Environmental Practices</b>                                         |
| Use harmful chemicals and pesticides                                   |
| Pollute air                                                            |
| Pollute water                                                          |
| Produce waste                                                          |
| Extract resources (e.g., water)                                        |
| Contribute to deforestation                                            |
| Consume energy                                                         |
| Expropriate land for industry activities                               |
| Contribute to greenhouse gas emissions                                 |
| Contribute to biodiversity loss                                        |

<sup>a</sup>Some of these activities (e.g., parental leave benefits) are influenced by the actions of other actors (e.g., government) and not solely determined by the company.

638

639

640

641

642

## Declarations

**Ethical approval and consent to participate:** Not applicable.

**Consent for publication:** Not applicable.

**Availability of data and materials:** The data for this study are published academic articles which are available from the respective publishers (see Additional File 1, Appendix 2 for the characteristics of included articles). In addition, we uploaded the following files to Open Science Framework (DOI 10.17605/OSF.IO/TG9S7) to support data availability: 1) a .csv file containing a list of the articles that underwent title and abstract screening in our study and the respective screening decisions that were assigned, and 2) .ris files containing the citations to the respective articles and the assigned screening decisions, which can be uploaded into a reference manager. Interested parties can contact the corresponding author for additional information.

**Competing interests:** The authors declare that they have no competing interests.

**Funding:** Raquel Burgess was supported by a Doctoral Foreign Study Award provided by the Canadian Institutes of Health Research at the time this research was conducted. Funding was provided by the Yale School of Public Health and the Yale Graduate Student Assembly to present this work at the American Public Health Association Annual Meeting in 2022.

**Authors' contributions:** R. Burgess conceptualized the study, completed the search and review process, synthesized the findings, and led the writing of the manuscript. K. Nyhan guided the review methodology and search strategy and contributed to the conceptualization of the study and revision of the manuscript. N. Freudenberg contributed to the intellectual content and revision of the manuscript and the development and revision of the typology and model. Y.

Ransome supervised the research and contributed to the conceptualization of the study and revision of the manuscript.

**Acknowledgements:** We would like to acknowledge the CDH experts who provided input on the HEALTH-CORP typology in the context of a related project. We would also like to acknowledge Dr. Trace Kershaw, Dr. Ijeoma Opara, and Dr. Rafael Perez-Escamilla for the useful feedback they provided related to this review.

## References

1. Freudenberg N, Lee K, Buse K, Collin J, Crosbie E, Friel S, et al. Defining Priorities for Action and Research on the Commercial Determinants of Health: A Conceptual Review. *Am J Public Health* [Internet]. 2021;111:2202–11. Available from: <http://ovidsp.ovid.com/ovidweb.cgi?T=JS&PAGE=reference&D=emexa&NEWS=N&AN=636863634>
2. Gilmore AB, Fabbri A, Baum F, Bertscher A, Bondy K, Chang H-J, et al. Defining and conceptualising the commercial determinants of health. *Lancet* [Internet]. 2023 [cited 2023 Apr 20];401:1194–213. Available from: <http://www.ncbi.nlm.nih.gov/pubmed/36966782>
3. Bennett E, Topp S, Moodie A. National Public Health Surveillance of Corporations in Key Unhealthy Commodity Industries—a scoping review and framework synthesis. *Int J Health Policy Manag.* 2023;1–41.
4. Mialon M, Swinburn B, Sacks G. A proposed approach to systematically identify and monitor the corporate political activity of the food industry with respect to public health using publicly available information. *Obesity Reviews* [Internet]. 2015 [cited 2022 Feb 2];16:519–30. Available from: <https://onlinelibrary.wiley.com/doi/full/10.1111/obr.12289>
5. Ulucanlar S, Fooks GJ, Gilmore AB. The Policy Dystopia Model: An Interpretive Analysis of Tobacco Industry Political Activity. *PLoS Med* [Internet]. 2016 [cited 2021 Sep 16];13:e1002125. Available from: <http://medicine.plosjournals.org/perlserv/?request=index-html&issn=1549-1676>
6. Madureira Lima J, Galea S. Corporate practices and health: A framework and mechanisms. *Global Health* [Internet]. 2018 [cited 2021 May 9];14:1–12. Available from: <https://www.scopus.com/inward/record.uri?eid=2-s2.0-85042139498&doi=10.1186%2Fs12992-018-0336-y&partnerID=40&md5=737e6e39d95d958e17845d3589cebe05>
7. Ulucanlar S, Lauber K, Fabbri A, Hawkins B, Mialon M, Hancock L, et al. Corporate Political Activity: Taxonomies and Model of Corporate Influence on Public Policy. 2023 [cited 2023 Apr 30]; Available from: <https://dx.doi.org/10.34172/ijhpm.2023.7292>
8. Baum FE, Sanders DM, Fisher M, Anaf J, Freudenberg N, Friel S, et al. Assessing the health impact of transnational corporations: Its importance and a framework. *Global Health* [Internet]. 2016 [cited 2021 Mar 9];12:1–7. Available from: <https://link.springer.com/articles/10.1186/s12992-016-0164-x>
9. Munn Z, Peters MDJ, Stern C, Tufanaru C, McArthur A, Aromataris E. Systematic review or scoping review? Guidance for authors when choosing between a systematic or scoping review approach. *BMC Med Res Methodol* [Internet]. 2018 [cited 2023 Apr 13];18:1–7. Available from: <https://bmcmmedresmethodol.biomedcentral.com/articles/10.1186/s12874-018-0611-x>
10. Bearman M, Dawson P. Qualitative synthesis and systematic review in health professions education. *Med Educ* [Internet]. 2013 [cited 2023 Dec 7];47:252–60. Available from: <https://onlinelibrary.wiley.com/doi/full/10.1111/medu.12092>
11. Tricco AC, Lillie E, Zarin W, O’Brien KK, Colquhoun H, Levac D, et al. PRISMA extension for scoping reviews (PRISMA-ScR): Checklist and explanation. *Ann Intern Med* [Internet]. 2018 [cited 2023 Mar 12];169:467–73. Available from: <https://www.acpjournals.org/doi/10.7326/M18-0850>

12. De Lacy-Vawdon C, Livingstone C. Defining the commercial determinants of health: A systematic review. BMC Public Health [Internet]. 2020 [cited 2021 May 15];20:1022. Available from: <https://rd.springer.com/article/10.1186/s12889-020-09126-1>
13. Mendeley Desktop. Elsevier;
14. Ouzzani M, Hammady H, Fedorowicz Z, Elmagarmid A. Rayyan - a web and mobile app for systematic reviews. Syst Rev. 2016;5.
15. The EndNote Team. EndNote. Philadelphia, PA: Clarivate; 2013.
16. QSR International. NVivo 12 qualitative data analysis software. 2020.
17. Glaser BG. The Constant Comparative Method of Qualitative Analysis. Soc Probl. 1965;12:436–45.
18. Baker P, Russ K, Kang M, Santos TM, Neves PAR, Smith J, et al. Globalization, first-foods systems transformations and corporate power: a synthesis of literature and data on the market and political practices of the transnational baby food industry. Global Health [Internet]. 2021;17:58. Available from: <https://www.scopus.com/inward/record.uri?eid=2-s2.0-85106677038&doi=10.1186%2Fs12992-021-00708-1&partnerID=40&md5=647acb4b9973cc4e440bcece840b947c>
19. Mialon M, Gaitan Charry DA, Cediél G, Crosbie E, Baeza Scagliusi F, Pérez Tamayo EM. “the architecture of the state was transformed in favour of the interests of companies”: Corporate political activity of the food industry in Colombia. Global Health [Internet]. 2020;16:97. Available from: <http://www.globalizationandhealth.com/>
20. Tanrikulu H, Neri D, Robertson A, Mialon M. Corporate political activity of the baby food industry: The example of Nestlé in the United States of America. Int Breastfeed J [Internet]. 2020;15:22. Available from: <https://www.scopus.com/inward/record.uri?eid=2-s2.0-85083098748&doi=10.1186%2Fs13006-020-00268-x&partnerID=40&md5=a89f6a235b94c64a067293a460d9e3d6>
21. Global Access to Nutrition Index 2021: Methodology. 2020.
22. Improving people’s health [Internet]. ShareAction. [cited 2023 Nov 4]. Available from: <https://shareaction.org/global-issues/better-health>
23. Peters M, Godfrey C, McInerney P, Munn Z, Tricco A, Khalil H. Chapter 11: Scoping Reviews. In: Aromataris E, Munn Z, editors. JBI Manual for Evidence Synthesis. JBI; 2020.
24. Burgess R, Nyhan K, Dharia N, Freudenberg N, Ransome Y. Characteristics of commercial determinants of health research on corporate activities: A scoping review. Provisionally accepted at PLOS One. 2024;
25. Gollom M. What you need to know about the SNC-Lavalin affair. CBC News. 2019 Feb 13;
26. Holland MS. Liability for Vaccine Injury: the United States, the European Union, and the Developing World. Emory Law J [Internet]. 2017;67:415–62. Available from: <http://eds.a.ebscohost.com/eds/detail/detail?vid=0&sid=de62705b-3bfe-4ca8-86e0-5eed44ad3cb8%40sdc-v-sessmgr02&bdata=JnNpdGU9ZWZLRzLWxpdmU%3D#AN=129043427&db=aph>
27. Wakefield T, Glantz SA, Apollonio DE, T. W, S.A. G. Content Analysis of the Corporate Social Responsibility Practices of 9 Major Cannabis Companies in Canada and the US. JAMA Netw Open [Internet]. 2022;E2228088. Available from: <https://jamanetwork.com/journals/jamanetworkopen>

28. Knai C, Petticrew M, Capewell S, Cassidy R, Collin J, Cummins S, et al. The case for developing a cohesive systems approach to research across unhealthy commodity industries. *BMJ Glob Health* [Internet]. 2021;6:e003543. Available from: <https://gh.bmj.com/>
29. Occupational Health [Internet]. International Labour Organization. [cited 2023 Feb 28]. Available from: [https://www.ilo.org/safework/areasofwork/occupational-health/lang--en/index.htm](https://www.ilo.org/safework/areasofwork/occupational-health/lang-en/index.htm)
30. Sattler B. Environmental Health. *Policy Polit Nurs Pract*. 2003;4:4–5.
31. Mialon M. An overview of the commercial determinants of health. *Global Health*. BioMed Central Ltd; 2020.
32. Buse K, Tanaka S, Hawkes S. Healthy people and healthy profits? Elaborating a conceptual framework for governing the commercial determinants of non-communicable diseases and identifying options for reducing risk exposure. *Global Health*. BioMed Central Ltd.; 2017.
33. Brown T. Legislative Capture: Critical Considerations in the Commercial Determinants of Health. *SSRN Electronic Journal* [Internet]. 2019; Available from: <https://www.ssrn.com/abstract=3687855>
34. van Schalkwyk MCI, Petticrew M, Cassidy R, Adams P, McKee M, Reynolds J, et al. A public health approach to gambling regulation: countering powerful influences. *Lancet Public Health*. 2021;6:e614–9.
35. Wiist WH. The Foundations of Corporate Strategies Comment on “‘Part of the Solution’: Food Corporation Strategies for Regulatory Capture and Legitimacy”. *Int J Health Policy Manag* [Internet]. 2022; Available from: <http://ovidsp.ovid.com/ovidweb.cgi?T=JS&PAGE=reference&D=medp&NEWS=N&AN=35397485>
36. Chavez-Ugalde Y, Jago R, Toumpakari Z, Egan M, Cummins S, White M, et al. Conceptualizing the commercial determinants of dietary behaviors associated with obesity: A systematic review using principles from critical interpretative synthesis. *Obes Sci Pract* [Internet]. 2021;7:473–86. Available from: <https://www.scopus.com/inward/record.uri?eid=2-s2.0-85103578531&doi=10.1002%2Fosp4.507&partnerID=40&md5=fbbb0335599e89a0add6892a7ec20c05>
37. Hoe C, Taber N, Champagne S, Bachani AM. Drink, but don’t drive? The alcohol industry’s involvement in global road safety. *Health Policy Plan* [Internet]. 2020;35:1328–38. Available from: <http://ovidsp.ovid.com/ovidweb.cgi?T=JS&PAGE=reference&D=emed22&NEWS=N&AN=633507007>
38. Wiist WH. Mechanisms Underlying Corporations as Determinants of Health. *Am J Public Health* [Internet]. 2019 [cited 2022 Jan 3];109:e1. Available from: <http://ovidsp.ovid.com/ovidweb.cgi?T=JS&PAGE=reference&D=emed20&NEWS=N&AN=625989148>
39. Eastmure E, Cummins S, Sparks L. Non-market strategy as a framework for exploring commercial involvement in health policy: A primer. *Soc Sci Med* [Internet]. 2020;262:113257. Available from: <https://www.scopus.com/inward/record.uri?eid=2-s2.0-85089080870&doi=10.1016%2Fj.socscimed.2020.113257&partnerID=40&md5=d263d4fad0fb157d521ed1b9ba25fc53>

40. Jamieson L, Gibson B, Thomson WM, L. J, B. G. Oral health inequalities and the corporate determinants of health: A commentary. *Int J Environ Res Public Health* [Internet]. 2020;17:1–6. Available from: <https://www.mdpi.com/1660-4601/17/18/6529/pdf>
41. McKee M, Stuckler D, M. M, McKee M, Stuckler D. Revisiting the corporate and commercial determinants of health. *Am J Public Health* [Internet]. 2018 [cited 2022 Jan 3];108:1167–70. Available from: <https://www.scopus.com/inward/record.uri?eid=2-s2.0-85051184487&doi=10.2105%2FAJPH.2018.304510&partnerID=40&md5=407ebdbc80f5eeb253021388f017af12>
42. Cossez E, Baker P, Mialon M. ‘The second mother’: How the baby food industry captures science, health professions and civil society in France. *Matern Child Nutr* [Internet]. 2022;18:e13301. Available from: [http://onlinelibrary.wiley.com/journal/10.1111/\(ISSN\)1740-8709](http://onlinelibrary.wiley.com/journal/10.1111/(ISSN)1740-8709)
43. Freudenberg N. Responding to Food Industry Initiatives to Be “Part of the Solution” Comment on “‘Part of the Solution’: Food Corporation Strategies for Regulatory Capture and Legitimacy.” *Int J Health Policy Manag* [Internet]. 2022;11:2740–3. Available from: <http://ovidsp.ovid.com/ovidweb.cgi?T=JS&PAGE=reference&D=emexb&NEWS=N&AN=638690701>
44. Adams PJJ, Rychert M, Wilkins C. Policy influence and the legalized cannabis industry: learnings from other addictive consumption industries. *Addiction* [Internet]. 2021;116:2939–46. Available from: <https://www.scopus.com/inward/record.uri?eid=2-s2.0-85103170796&doi=10.1111%2Fadd.15483&partnerID=40&md5=b9e5eb3fa6837fad7c7b1da8f850f427>
45. Kroker-Lobos MF, Morales LA, Ramirez-Zea M, Vandevijvere S, Champagne B, Mialon M, et al. Two countries, similar practices: The political practices of the food industry influencing the adoption of key public health nutrition policies in Guatemala and Panama. *Public Health Nutr* [Internet]. 2022;1–33. Available from: <http://ovidsp.ovid.com/ovidweb.cgi?T=JS&PAGE=reference&D=emexb&NEWS=N&AN=638801438>
46. Maani Hessari N, Ruskin G, McKee M, Stuckler D. Public Meets Private: Conversations Between Coca-Cola and the CDC. *Milbank Quarterly* [Internet]. 2019;97:74–90. Available from: [http://onlinelibrary.wiley.com/journal/10.1111/\(ISSN\)1468-0009](http://onlinelibrary.wiley.com/journal/10.1111/(ISSN)1468-0009)
47. Hastings G, Angus K, Eadie D, Hunt K. Selling second best: How infant formula marketing works. *Global Health* [Internet]. 2020;16:77. Available from: <http://ovidsp.ovid.com/ovidweb.cgi?T=JS&PAGE=reference&D=emed21&NEWS=N&AN=632727368>
48. Hird TR, Gallagher AWA, Evans-Reeves K, Zatonski M, Dance S, Diethelm PA, et al. Understanding the long-term policy influence strategies of the tobacco industry: two contemporary case studies. *Tob Control* [Internet]. 2022;31:297–307. Available from: <https://www.scopus.com/inward/record.uri?eid=2-s2.0-85125690415&doi=10.1136%2Ftobaccocontrol-2021-057030&partnerID=40&md5=39c263575d3e9fdd09f112b4e324b535>
49. Mialon M, Charry DAG, Cediel G, Crosbie E, Scagliusi FB, Tamayo EMP. “I had never seen so many lobbyists”: Food industry political practices during the development of a new nutrition front-of-pack labelling system in Colombia. *Public Health Nutr* [Internet]. 2021;24:2737–45.



847 Available from:  
848 <http://ovidsp.ovid.com/ovidweb.cgi?T=JS&PAGE=reference&D=emed22&NEWS=N&AN=63266>  
849 8742  
850 50. Maani N, Van Schalkwyk MC, Petticrew M, Galea S. The Commercial Determinants of Three  
851 Contemporary National Crises: How Corporate Practices Intersect With the COVID-19  
852 Pandemic, Economic Downturn, and Racial Inequity. *Milbank Quarterly* [Internet]. 2021 [cited  
853 2022 Feb 2];99:503–18. Available from: [https://www.scopus.com/inward/record.uri?eid=2-](https://www.scopus.com/inward/record.uri?eid=2-s2.0-85103384553&doi=10.1111%2F1468-0009.12510&partnerID=40&md5=0cb90796e1918e0b9a4cc9becfd5fa48)  
854 [s2.0-85103384553&doi=10.1111%2F1468-](https://www.scopus.com/inward/record.uri?eid=2-s2.0-85103384553&doi=10.1111%2F1468-0009.12510&partnerID=40&md5=0cb90796e1918e0b9a4cc9becfd5fa48)  
855 [0009.12510&partnerID=40&md5=0cb90796e1918e0b9a4cc9becfd5fa48](https://www.scopus.com/inward/record.uri?eid=2-s2.0-85103384553&doi=10.1111%2F1468-0009.12510&partnerID=40&md5=0cb90796e1918e0b9a4cc9becfd5fa48)  
856 51. Mialon M, Crosbie E, Sacks G, M. M, E. C, Sacks G. AO - Mialon MO [https://orcid.org/0000-](https://orcid.org/0000-0002-9883-6441)  
857 [0002-9883-6441](https://orcid.org/0000-0002-9883-6441). Mapping of food industry strategies to influence public health policy, research  
858 and practice in South Africa. *Int J Public Health* [Internet]. 2020;65:1027–36. Available from:  
859 <http://ovidsp.ovid.com/ovidweb.cgi?T=JS&PAGE=reference&D=emed21&NEWS=N&AN=63248>  
860 8017  
861 52. Lauber K, Hunt D, Gilmore AB, Rutter H. Corporate political activity in the context of  
862 unhealthy food advertising restrictions across Transport for London: A qualitative case study.  
863 *PLoS Med.* 2021;18.  
864 53. Hunt D. How food companies use social media to influence policy debates: A framework of  
865 Australian ultra-processed food industry Twitter data. *Public Health Nutr.* 2021;24:3124–35.  
866 54. Lauber K, Ralston R, Mialon M, Carriedo A, Gilmore AB. Non-communicable disease  
867 governance in the era of the sustainable development goals: A qualitative analysis of food  
868 industry framing in WHO consultations. *Global Health.* 2020;16.  
869 55. Lacy-Nichols J, Marten R. Power and the commercial determinants of health: Ideas for a  
870 research agenda. *BMJ Glob Health.* BMJ Publishing Group; 2021.  
871 56. Knai C, Petticrew M, Mays N, Capewell S, Cassidy R, Cummins S, et al. Systems Thinking as a  
872 Framework for Analyzing Commercial Determinants of Health. *Milbank Quarterly.* 2018;96:472–  
873 98.  
874 57. Campbell N, Browne S, Claudy M, Mialon M, Hercberg S, Goiana-da-Silva F, et al. The Gift of  
875 Data: Industry-Led Food Reformulation and the Obesity Crisis in Europe. *Journal of Public Policy*  
876 *and Marketing.* 2021;40:389–402.  
877 58. Lacy-Nichols J, Scrinis G, Carey R. The politics of voluntary self-regulation: Insights from the  
878 development and promotion of the Australian Beverages Council’s Commitment. *Public Health*  
879 *Nutr.* 2020;23:564–75.  
880 59. Backholer K, Baum F, Finlay SM, Friel S, Giles-Corti B, Jones A, et al. Australia in 2030: what  
881 is our path to health for all? *Medical Journal of Australia.* 2021;214:S5–40.  
882 60. S.E. H, P. J, R.T. N, Collin J. AO - Hill Rima T.; ORCID: [https://orcid.org/0000-0001-8800-](https://orcid.org/0000-0001-8800-5591)  
883 [5591](https://orcid.org/0000-0001-8800-5591) SE; O <https://orcid.org/0000-0003-3555-433X> AO-N, Hill SE, Johns P, et al. From silos to  
884 policy coherence: tobacco control, unhealthy commodity industries and the commercial  
885 determinants of health. *Tob Control* [Internet]. 2022;31:322–7. Available from:  
886 [https://www.scopus.com/inward/record.uri?eid=2-s2.0-](https://www.scopus.com/inward/record.uri?eid=2-s2.0-85125691950&doi=10.1136%2Ftobaccocontrol-2021-057136&partnerID=40&md5=eaf9dd75ae1ce88ae3e426ec832340ba)  
887 [85125691950&doi=10.1136%2Ftobaccocontrol-2021-](https://www.scopus.com/inward/record.uri?eid=2-s2.0-85125691950&doi=10.1136%2Ftobaccocontrol-2021-057136&partnerID=40&md5=eaf9dd75ae1ce88ae3e426ec832340ba)  
888 [057136&partnerID=40&md5=eaf9dd75ae1ce88ae3e426ec832340ba](https://www.scopus.com/inward/record.uri?eid=2-s2.0-85125691950&doi=10.1136%2Ftobaccocontrol-2021-057136&partnerID=40&md5=eaf9dd75ae1ce88ae3e426ec832340ba)



61. Hill SE, Friel S. 'As long as it comes off as a cigarette ad, not a civil rights message': Gender, inequality and the commercial determinants of health. *Int J Environ Res Public Health* [Internet]. 2020;17:1–19. Available from: <https://www.mdpi.com/1660-4601/17/21/7902/pdf>
62. Millar JS. The corporate determinants of health: How big business affects our health, and the need for government action! *Canadian Journal of Public Health* [Internet]. 2013 [cited 2021 May 11];104:e327–9. Available from: <http://journal.cpha.ca/index.php/cjph/article/download/3849/2840>
63. Van Schalkwyk MC, Maani N, Cohen J, Mckee M, Petticrew M. Our Postpandemic World: What Will It Take to Build a Better Future for People and Planet? *Milbank Quarterly* [Internet]. 2021;99:467–502. Available from: <https://www.scopus.com/inward/record.uri?eid=2-s2.0-85103403620&doi=10.1111%2F1468-0009.12508&partnerID=40&md5=1d3dd9e1dc9d712ab17e510f3e23d636>
64. Zenone M, Kenworthy N, Maani N. The Social Media Industry as a Commercial Determinant of Health. *Int J Health Policy Manag* [Internet]. 2023;12. Available from: <http://ovidsp.ovid.com/ovidweb.cgi?T=JS&PAGE=reference&D=medp&NEWS=N&AN=35490262>
65. Wood B, Baker P, Sacks G. Conceptualising the Commercial Determinants of Health Using a Power Lens: A Review and Synthesis of Existing Frameworks. *Int J Health Policy Manag* [Internet]. 2022;11:1251–61. Available from: <http://ovidsp.ovid.com/ovidweb.cgi?T=JS&PAGE=reference&D=emexb&NEWS=N&AN=634395313>
66. Brown T. Public Health versus Alcohol Industry Compliance Laws: A Case of Industry Capture? *J Law Med* [Internet]. 2020;27:1047–73. Available from: <https://www.scopus.com/inward/record.uri?eid=2-s2.0-85090260756&partnerID=40&md5=2b8d09a793fa746a935cd0f17d30a7c3>
67. Abdool Karim S, Kruger P, Hofman K. Industry strategies in the parliamentary process of adopting a sugar-sweetened beverage tax in South Africa: a systematic mapping. *Global Health* [Internet]. 2020;16:116. Available from: <http://www.globalizationandhealth.com/>
68. Mialon M, Mialon J, Calixto Andrade G, Jean-Claude M. 'We must have a sufficient level of profitability': food industry submissions to the French parliamentary inquiry on industrial food. *Crit Public Health* [Internet]. 2020;30:457–67. Available from: <https://www.tandf.co.uk/journals/titles/09581596.asp>
69. Mialon M, Khandpur N, Laís MA, Martins APB. Arguments used by trade associations during the early development of a new front-of-pack nutrition labelling system in Brazil. *Public Health Nutr*. 2020;
70. Barlow P, Thow AM, P. B. Neoliberal discourse, actor power, and the politics of nutrition policy: A qualitative analysis of informal challenges to nutrition labelling regulations at the World Trade Organization, 2007-2019. *Soc Sci Med* [Internet]. 2021;273:113761. Available from: <https://www.elsevier.com/locate/socscimed>
71. Clare K, Maani N, Milner J. Meat, money and messaging: How the environmental and health harms of red and processed meat consumption are framed by the meat industry. *Food Policy* [Internet]. 2022;109. Available from: <https://www.scopus.com/inward/record.uri?eid=2-s2.0-85127324192&doi=10.1016%2Fj.foodpol.2022.102234&partnerID=40&md5=05065edaeda523067beeab20336ba5af>

72. Hoe C, Weiger C, Minosa MKR, Alonso F, Koon AD, Cohen JE. Strategies to expand corporate autonomy by the tobacco, alcohol and sugar-sweetened beverage industry: a scoping review of reviews. *Global Health* [Internet]. 2022;18:17. Available from: <http://www.globalizationandhealth.com/>
73. Russ K, Baker P, Byrd M, Kang M, Siregar RN, Zahid H, et al. What You Don't Know About the Codex Can Hurt You: How Trade Policy Trumps Global Health Governance in Infant and Young Child Nutrition. *Int J Health Policy Manag* [Internet]. 2021;10:983–97. Available from: <http://ovidsp.ovid.com/ovidweb.cgi?T=JS&PAGE=reference&D=medp&NEWS=N&AN=34634868>
74. Baker P, Zambrano P, Mathisen R, Singh-Vergeire MRR, Escobar AEE, Mialon M, et al. Breastfeeding, first-food systems and corporate power: a case study on the market and political practices of the transnational baby food industry and public health resistance in the Philippines. *Global Health* [Internet]. 2021;17. Available from: <https://www.scopus.com/inward/record.uri?eid=2-s2.0-85118243807&doi=10.1186%2Fs12992-021-00774-5&partnerID=40&md5=1844e47474ba77e1e2b1c38668ddc4ff>
75. Brisbois B, Feagan M, Stime B, Paz IK, Berbés-Blázquez M, Gaibor J, et al. Mining, Colonial Legacies, and Neoliberalism: A Political Ecology of Health Knowledge: Minería, legados coloniales y neoliberalismo: una ecología política del conocimiento en salud. *New Solutions* [Internet]. 2021;31:48–64. Available from: <https://www.scopus.com/inward/record.uri?eid=2-s2.0-85102708084&doi=10.1177%2f10482911211001051&partnerID=40&md5=3342652af1e49caa84d5a3a9a88c62e5>
76. Mialon M, Crosbie E, Sacks G. Mapping of food industry strategies to influence public health policy, research and practice in South Africa. *Int J Public Health*. 2020;65:1027–36.
77. McHardy J. The WHO FCTC's lessons for addressing the commercial determinants of health. *Health Promot Int*. 2021;36:i39–52.
78. Fooks GJ, Godziewski C. The World Health Organization, Corporate Power, and the Prevention and Management of Conflicts of Interest in Nutrition Policy Comment on “Towards Preventing and Managing Conflict of Interest in Nutrition Policy? An Analysis of Submissions to a Consultati. *Int J Health Policy Manag* [Internet]. 2022;11:228–32. Available from: <https://www.scopus.com/inward/record.uri?eid=2-s2.0-85125551514&doi=10.34172%2Fijhpm.2020.156&partnerID=40&md5=3a84e743cc8ba9c4de5b74a23cea8dbc>
79. Kadandale S, Marten R, Smith R, S. K, R. M. The palm oil industry and noncommunicable diseases. *Bull World Health Organ* [Internet]. 2019;97:118–28. Available from: <https://www.who.int/bulletin/volumes/97/2/18-220434.pdf?ua=1>
80. Mialon M, Corvalan C, Cediel G, Scagliusi FBBFB, Reyes M. Food industry political practices in Chile: “the economy has always been the main concern.” *Global Health* [Internet]. 2020;16. Available from: <https://www.scopus.com/inward/record.uri?eid=2-s2.0-85094114467&doi=10.1186%2Fs12992-020-00638-4&partnerID=40&md5=5f40dc19b429497220ed4eb238798d2a>
81. Mialon M, Ho M, Carriedo A, Ruskin G, Crosbie E. Beyond nutrition and physical activity: food industry shaping of the very principles of scientific integrity. *Global Health*. 2021;17.

977 82. Madureira Lima J, Galea S. The Corporate Permeation Index – A tool to study the  
978 macrosocial determinants of Non-Communicable Disease. *SSM Popul Health*. 2019;7.  
979 83. Steele S, Sarcevic L, Ruskin G, Stuckler D. Confronting potential food industry ‘front groups’:  
980 case study of the international food information Council’s nutrition communications using the  
981 UCSF food industry documents archive. *Global Health [Internet]*. 2022;18. Available from:  
982 [https://www.scopus.com/inward/record.uri?eid=2-s2.0-](https://www.scopus.com/inward/record.uri?eid=2-s2.0-85124620522&doi=10.1186%2Fs12992-022-00806-8&partnerID=40&md5=236e555adb516f8c68e688a1099a19bd)  
983 [85124620522&doi=10.1186%2Fs12992-022-00806-](https://www.scopus.com/inward/record.uri?eid=2-s2.0-85124620522&doi=10.1186%2Fs12992-022-00806-8&partnerID=40&md5=236e555adb516f8c68e688a1099a19bd)  
984 [8&partnerID=40&md5=236e555adb516f8c68e688a1099a19bd](https://www.scopus.com/inward/record.uri?eid=2-s2.0-85124620522&doi=10.1186%2Fs12992-022-00806-8&partnerID=40&md5=236e555adb516f8c68e688a1099a19bd)  
985 84. Ramsbottom A, van Schalkwyk MCI, Carters-White L, Benylles Y, Petticrew M. Food as harm  
986 reduction during a drinking session: reducing the harm or normalising harmful use of alcohol? A  
987 qualitative comparative analysis of alcohol industry and non-alcohol industry-funded guidance.  
988 *Harm Reduct J [Internet]*. 2022;19:66. Available from:  
989 <http://www.harmreductionjournal.com/home/>  
990 85. Watts C, Burton S, Freeman B, C. W, S. B, Watts C, et al. ‘The last line of marketing’: Covert  
991 tobacco marketing tactics as revealed by former tobacco industry employees. *Glob Public*  
992 *Health [Internet]*. 2021;16:1000–13. Available from:  
993 <http://www.tandf.co.uk/journals/titles/17441692.asp>  
994 86. Mialon M. An overview of the commercial determinants of health. *Global Health [Internet]*.  
995 2020 [cited 2021 May 15];16:74. Available from: [/pmc/articles/PMC7433173/](https://pubmed.ncbi.nlm.nih.gov/3433173/)  
996 87. Backholer K, Baum F, Finlay SM, Friel S, Giles-Corti B, Jones A, et al. Australia in 2030: what  
997 is our path to health for all? *Medical Journal of Australia [Internet]*. 2021;214:S5–40. Available  
998 from: [https://www.scopus.com/inward/record.uri?eid=2-s2.0-](https://www.scopus.com/inward/record.uri?eid=2-s2.0-85105030886&doi=10.5694%2Fmja2.51020&partnerID=40&md5=b0e8f243e5557cdab73f9165d726c401)  
999 [85105030886&doi=10.5694%2Fmja2.51020&partnerID=40&md5=b0e8f243e5557cdab73f9165](https://www.scopus.com/inward/record.uri?eid=2-s2.0-85105030886&doi=10.5694%2Fmja2.51020&partnerID=40&md5=b0e8f243e5557cdab73f9165d726c401)  
1000 [d726c401](https://www.scopus.com/inward/record.uri?eid=2-s2.0-85105030886&doi=10.5694%2Fmja2.51020&partnerID=40&md5=b0e8f243e5557cdab73f9165d726c401)  
1001 88. Kasture A, Vandevijvere S, Robinson E, Sacks G, Swinburn B, A. K, et al. Benchmarking the  
1002 commitments related to population nutrition and obesity prevention of major food companies  
1003 in New Zealand. *Int J Public Health [Internet]*. 2019;64:1147–57. Available from:  
1004 [http://ovidsp.ovid.com/ovidweb.cgi?T=JS&PAGE=reference&D=emed20&NEWS=N&AN=62846](http://ovidsp.ovid.com/ovidweb.cgi?T=JS&PAGE=reference&D=emed20&NEWS=N&AN=628462909)  
1005 [2909](http://ovidsp.ovid.com/ovidweb.cgi?T=JS&PAGE=reference&D=emed20&NEWS=N&AN=628462909)  
1006 89. Sacks G, Robinson E, Cameron AJ, Vanderlee L, Vandevijvere S, Swinburn B. Benchmarking  
1007 the nutrition-related policies and commitments of major food companies in Australia, 2018. *Int*  
1008 *J Environ Res Public Health [Internet]*. 2020;17:1–23. Available from:  
1009 <https://www.mdpi.com/1660-4601/17/17/6118/pdf>  
1010 90. Stubbs T. Commercial determinants of youth smoking in ASEAN countries: A narrative  
1011 review of research investigating the influence of tobacco advertising, promotion, and  
1012 sponsorship. *Tob Induc Dis [Internet]*. 2021;19:1–14. Available from:  
1013 [http://www.tobaccoinduceddiseases.org/Commercial-determinants-of-youth-smoking-in-](http://www.tobaccoinduceddiseases.org/Commercial-determinants-of-youth-smoking-in-ASEAN-countries-A-narrative-review-of,139124,0,2.html)  
1014 [ASEAN-countries-A-narrative-review-of,139124,0,2.html](http://www.tobaccoinduceddiseases.org/Commercial-determinants-of-youth-smoking-in-ASEAN-countries-A-narrative-review-of,139124,0,2.html)  
1015 91. Baker P, Santos T, Neves PA, Machado P, Smith J, Piwoz E, et al. First-food systems  
1016 transformations and the ultra-processing of infant and young child diets: The determinants,  
1017 dynamics and consequences of the global rise in commercial milk formula consumption. *Matern*  
1018 *Child Nutr [Internet]*. 2021;17:e13097. Available from:  
1019 [http://onlinelibrary.wiley.com/journal/10.1111/\(ISSN\)1740-8709](http://onlinelibrary.wiley.com/journal/10.1111/(ISSN)1740-8709)

- 1020 92. Gillespie D, Hatchard J, Squires H, Gilmore A, Brennan A. Conceptualising changes to  
1021 tobacco and alcohol policy as affecting a single interlinked system. BMC Public Health  
1022 [Internet]. 2021;21:17. Available from: <https://www.scopus.com/inward/record.uri?eid=2-s2.0-85098644699&doi=10.1186%2Fs12889-020-10000-3&partnerID=40&md5=e5046721715e4d0dfd126d66c88329f6>  
1023 3&partnerID=40&md5=e5046721715e4d0dfd126d66c88329f6
- 1024 93. Wood B, Williams O, Nagarajan V, Sacks G. Market strategies used by processed food  
1025 manufacturers to increase and consolidate their power: a systematic review and document  
1026 analysis. Global Health [Internet]. 2021;17:17. Available from:  
1027 <http://www.globalizationandhealth.com/>
- 1028 94. Peres MA, Macpherson LMDD, Weyant RJ, Daly B, Venturelli R, Mathur MR, et al. Oral  
1029 diseases: a global public health challenge. The Lancet [Internet]. 2019;394:249–60. Available  
1030 from: <http://www.journals.elsevier.com/the-lancet/>
- 1031 95. Hessari NM, Bertscher A, Critchlow N, Fitzgerald N, Knai C, Stead M, et al. Recruiting the  
1032 “heavy-using loyalists of tomorrow”: An analysis of the aims, effects and mechanisms of alcohol  
1033 advertising, based on advertising industry evaluations. Int J Environ Res Public Health [Internet].  
1034 2019;16:1–17. Available from: <https://www.scopus.com/inward/record.uri?eid=2-s2.0-85074139312&doi=10.3390%2Fijerph16214092&partnerID=40&md5=71513da90629d98e92e1c0eeae4cbb3f>  
1035 2019;16:1–17. Available from: <https://www.scopus.com/inward/record.uri?eid=2-s2.0-85074139312&doi=10.3390%2Fijerph16214092&partnerID=40&md5=71513da90629d98e92e1c0eeae4cbb3f>  
1036 85074139312&doi=10.3390%2Fijerph16214092&partnerID=40&md5=71513da90629d98e92e1c0eeae4cbb3f
- 1037 96. Kickbusch I, Allen L, Franz C. The commercial determinants of health. Lancet Glob Health  
1038 [Internet]. 2016 [cited 2021 May 9];4:e895–6. Available from:  
1039 <http://www.who.int/dg/speeches/2013/>
- 1040 97. Gerritsen S, Sing F, Lin K, Martino F, Backholer K, Culpin A, et al. The Timing, Nature and  
1041 Extent of Social Media Marketing by Unhealthy Food and Drinks Brands During the COVID-19  
1042 Pandemic in New Zealand. Front Nutr [Internet]. 2021;8. Available from:  
1043 <https://www.scopus.com/inward/record.uri?eid=2-s2.0-85102938343&doi=10.3389%2Ffnut.2021.645349&partnerID=40&md5=65acfb958cad416bfc974c83ba97fb41>  
1044 85102938343&doi=10.3389%2Ffnut.2021.645349&partnerID=40&md5=65acfb958cad416bfc974c83ba97fb41
- 1045 98. McCarthy S, Thomas S, Pitt H, Daube M, Cassidy R. ‘It’s a tradition to go down to the pokies  
1046 on your 18th birthday’ – the normalisation of gambling for young women in Australia. Aust N Z J  
1047 Public Health [Internet]. 2020;44:376–81. Available from:  
1048 <https://www.scopus.com/inward/record.uri?eid=2-s2.0-85091146395&doi=10.1111%2F1753-6405.13024&partnerID=40&md5=7092d70312d7104b43a715943a9c898b>  
1049 85091146395&doi=10.1111%2F1753-6405.13024&partnerID=40&md5=7092d70312d7104b43a715943a9c898b
- 1050 99. Maani N, Collin J, Friel S, Gilmore AB, McCambridge J, Robertson L, et al. The need for a  
1051 conceptual understanding of the macro and meso commercial determinants of health  
1052 inequalities. Eur J Public Health [Internet]. 2021;31:674–5. Available from:  
1053 <http://ovidsp.ovid.com/ovidweb.cgi?T=JS&PAGE=reference&D=emed22&NEWS=N&AN=635351225>  
1054 635351225
- 1055 100. Petticrew M, Maani N, Pettigrew L, Rutter H, Van Schalkwyk MCC, M. P, et al. Dark Nudges  
1056 and Sludge in Big Alcohol: Behavioral Economics, Cognitive Biases, and Alcohol Industry  
1057 Corporate Social Responsibility. Milbank Quarterly [Internet]. 2020;98:1290–328. Available  
1058 from: [http://onlinelibrary.wiley.com/journal/10.1111/\(ISSN\)1468-0009](http://onlinelibrary.wiley.com/journal/10.1111/(ISSN)1468-0009)
- 1059 101. Madden M, McCambridge J. Alcohol marketing versus public health: David and Goliath?  
1060 Global Health. 2021;17.
- 1061
- 1062

- 1063 102. Mialon M, Jaramillo Á, Caro P, Flores M, González L, Gutierrez-Gómez Y, et al. Involvement  
1064 of the food industry in nutrition conferences in Latin America and the Caribbean. *Public Health*  
1065 *Nutr.* 2021;24:1559–65.
- 1066 103. Maani N, van Schalkwyk MCI, Filippidis FT, Knai C, Petticrew M. Manufacturing doubt:  
1067 Assessing the effects of independent vs industry-sponsored messaging about the harms of fossil  
1068 fuels, smoking, alcohol, and sugar sweetened beverages. *SSM Popul Health* [Internet]. 2022;17.  
1069 Available from: [https://www.scopus.com/inward/record.uri?eid=2-s2.0-](https://www.scopus.com/inward/record.uri?eid=2-s2.0-85122512838&doi=10.1016%2Fj.ssmph.2021.101009&partnerID=40&md5=6bb81ee048201ee7b571dbfd0906fbae)  
1070 [85122512838&doi=10.1016%2Fj.ssmph.2021.101009&partnerID=40&md5=6bb81ee048201ee7](https://www.scopus.com/inward/record.uri?eid=2-s2.0-85122512838&doi=10.1016%2Fj.ssmph.2021.101009&partnerID=40&md5=6bb81ee048201ee7b571dbfd0906fbae)  
1071 [b571dbfd0906fbae](https://www.scopus.com/inward/record.uri?eid=2-s2.0-85122512838&doi=10.1016%2Fj.ssmph.2021.101009&partnerID=40&md5=6bb81ee048201ee7b571dbfd0906fbae)
- 1072 104. Passini CSM, Cavalcanti MB, Ribas SA, de Carvalho CMP, Bocca C, Lamarca F. Conflict of  
1073 Interests in the Scientific Production on Vitamin D and COVID-19: A Scoping Review. *Front*  
1074 *Public Health* [Internet]. 2022;10. Available from:  
1075 [https://www.scopus.com/inward/record.uri?eid=2-s2.0-](https://www.scopus.com/inward/record.uri?eid=2-s2.0-85134982503&doi=10.3389%2Ffpubh.2022.821740&partnerID=40&md5=18bd911940a964f74588d32277577685)  
1076 [85134982503&doi=10.3389%2Ffpubh.2022.821740&partnerID=40&md5=18bd911940a964f74](https://www.scopus.com/inward/record.uri?eid=2-s2.0-85134982503&doi=10.3389%2Ffpubh.2022.821740&partnerID=40&md5=18bd911940a964f74588d32277577685)  
1077 [588d32277577685](https://www.scopus.com/inward/record.uri?eid=2-s2.0-85134982503&doi=10.3389%2Ffpubh.2022.821740&partnerID=40&md5=18bd911940a964f74588d32277577685)
- 1078 105. Buse K, Mialon M, Jones A. Thinking Politically About UN Political Declarations: A Recipe  
1079 for Healthier Commitments—Free of Commercial Interests. *Int J Health Policy Manag* [Internet].  
1080 2022;11:1208–11. Available from: [https://www.scopus.com/inward/record.uri?eid=2-s2.0-](https://www.scopus.com/inward/record.uri?eid=2-s2.0-85135208447&doi=10.34172%2Fijhpm.2021.92&partnerID=40&md5=10f69f23f7b53b81a95bc3339f34f37f)  
1081 [85135208447&doi=10.34172%2Fijhpm.2021.92&partnerID=40&md5=10f69f23f7b53b81a95bc](https://www.scopus.com/inward/record.uri?eid=2-s2.0-85135208447&doi=10.34172%2Fijhpm.2021.92&partnerID=40&md5=10f69f23f7b53b81a95bc3339f34f37f)  
1082 [3339f34f37f](https://www.scopus.com/inward/record.uri?eid=2-s2.0-85135208447&doi=10.34172%2Fijhpm.2021.92&partnerID=40&md5=10f69f23f7b53b81a95bc3339f34f37f)
- 1083 106. Mendly-Zambo Z, Raphael D, Taman A. Take the money and run: how food banks became  
1084 complicit with Walmart Canada’s hunger producing employment practices. *Crit Public Health*  
1085 [Internet]. 2021;00:1–12. Available from: <https://doi.org/10.1080/09581596.2021.1955828>
- 1086 107. Kenworthy NJ. Crowdfunding and global health disparities: an exploratory conceptual and  
1087 empirical analysis. *Global Health* [Internet]. 2019;15:71. Available from:  
1088 [https://www.scopus.com/inward/record.uri?eid=2-s2.0-](https://www.scopus.com/inward/record.uri?eid=2-s2.0-85075763795&doi=10.1186%2Fs12992-019-0519-1&partnerID=40&md5=741b59de63218030767d7780a71c1242)  
1089 [85075763795&doi=10.1186%2Fs12992-019-0519-](https://www.scopus.com/inward/record.uri?eid=2-s2.0-85075763795&doi=10.1186%2Fs12992-019-0519-1&partnerID=40&md5=741b59de63218030767d7780a71c1242)  
1090 [1&partnerID=40&md5=741b59de63218030767d7780a71c1242](https://www.scopus.com/inward/record.uri?eid=2-s2.0-85075763795&doi=10.1186%2Fs12992-019-0519-1&partnerID=40&md5=741b59de63218030767d7780a71c1242)
- 1091 108. Wood B, McCoy D, Baker P, Williams O, Sacks G. The double burden of maldistribution: a  
1092 descriptive analysis of corporate wealth and income distribution in four unhealthy commodity  
1093 industries. *Crit Public Health* [Internet]. 2023 [cited 2023 Apr 20];33:135–47. Available from:  
1094 <https://www.tandfonline.com/doi/abs/10.1080/09581596.2021.2019681>
- 1095 109. Rochford C, Tenneti N, Moodie R. Reframing the impact of business on health: The  
1096 interface of corporate, commercial, political and social determinants of health. *BMJ Glob Health*  
1097 [Internet]. 2019 [cited 2021 Sep 16];4:e001510. Available from:  
1098 [https://www.scopus.com/inward/record.uri?eid=2-s2.0-85071114198&doi=10.1136%2Fbmjgh-](https://www.scopus.com/inward/record.uri?eid=2-s2.0-85071114198&doi=10.1136%2Fbmjgh-2019-001510&partnerID=40&md5=c068de6a0e6ebfc5a2664a4c3bf45450)  
1099 [2019-001510&partnerID=40&md5=c068de6a0e6ebfc5a2664a4c3bf45450](https://www.scopus.com/inward/record.uri?eid=2-s2.0-85071114198&doi=10.1136%2Fbmjgh-2019-001510&partnerID=40&md5=c068de6a0e6ebfc5a2664a4c3bf45450)
- 1100 110. The Lancet. Unravelling the commercial determinants of health. In: Maani N, Pettigrew M,  
1101 Galea S, editors. *The Lancet*. Oxford Univ Press; 2023. p. 1131.
- 1102 111. Rose N, Reeve B, Charlton K. Barriers and Enablers for Healthy Food Systems and  
1103 Environments: The Role of Local Governments. *Curr Nutr Rep* [Internet]. 2022;11:82–93.  
1104 Available from:  
1105 [http://www.springer.com/new+%26+forthcoming+titles+%28default%29/journal/13668?chang](http://www.springer.com/new+%26+forthcoming+titles+%28default%29/journal/13668?changeHeader)  
1106 [eHeader](http://www.springer.com/new+%26+forthcoming+titles+%28default%29/journal/13668?changeHeader)



- 1107 112. Liber AC. Using Regulatory Stances to See All the Commercial Determinants of Health.  
1108 Milbank Quarterly [Internet]. 2022; Available from:  
1109 [http://onlinelibrary.wiley.com/journal/10.1111/\(ISSN\)1468-0009](http://onlinelibrary.wiley.com/journal/10.1111/(ISSN)1468-0009)  
1110 113. Loewenson R. Rethinking the Paradigm and Practice of Occupational Health in a World  
1111 Without Decent Work: A Perspective From East and Southern Africa. New Solutions [Internet].  
1112 2021;31:107–12. Available from:  
1113 <http://ovidsp.ovid.com/ovidweb.cgi?T=JS&PAGE=reference&D=emed22&NEWS=N&AN=63510>  
1114 2021  
1115 114. Montiel I, Park J, Husted BW, Velez-Calle A. Tracing the connections between international  
1116 business and communicable diseases. J Int Bus Stud [Internet]. 2022; Available from:  
1117 [https://www.scopus.com/inward/record.uri?eid=2-s2.0-](https://www.scopus.com/inward/record.uri?eid=2-s2.0-85126885873&doi=10.1057%2Fs41267-022-00512-y&partnerID=40&md5=d0e830c2680d8f506200dc887087b27d)  
1118 [85126885873&doi=10.1057%2Fs41267-022-00512-](https://www.scopus.com/inward/record.uri?eid=2-s2.0-85126885873&doi=10.1057%2Fs41267-022-00512-y&partnerID=40&md5=d0e830c2680d8f506200dc887087b27d)  
1119 [y&partnerID=40&md5=d0e830c2680d8f506200dc887087b27d](https://www.scopus.com/inward/record.uri?eid=2-s2.0-85126885873&doi=10.1057%2Fs41267-022-00512-y&partnerID=40&md5=d0e830c2680d8f506200dc887087b27d)  
1120 115. consumer. Cambridge Dictionary.  
1121 116. worker. Cambridge Dictionary.  
1122 117. Appendix E to Part 26 - Individual Determinations of Social and Economic Disadvantage  
1123 [Internet]. U.S. Department of Transportation. [cited 2023 Nov 5]. Available from:  
1124 [https://www.transportation.gov/civil-rights/appendix-e-part-26-individual-determinations-](https://www.transportation.gov/civil-rights/appendix-e-part-26-individual-determinations-social-and-economic-disadvantage)  
1125 [social-and-economic-disadvantage](https://www.transportation.gov/civil-rights/appendix-e-part-26-individual-determinations-social-and-economic-disadvantage)  
1126 118. Frank J, Mustard C, Smith P, Siddiqi A, Cheng Y, Burdorf A, et al. Work as a social  
1127 determinant of health in high-income countries: past, present, and future. The Lancet  
1128 [Internet]. 2023;402:1357–67. Available from: [http://dx.doi.org/10.1016/S0140-](http://dx.doi.org/10.1016/S0140-6736(23)00871-1)  
1129 [6736\(23\)00871-1](http://dx.doi.org/10.1016/S0140-6736(23)00871-1)  
1130 119. Eisenberg-Guyot J, Prins SJ, Muntaner C. Free agents or cogs in the machine? Classed,  
1131 gendered, and racialized inequities in hazardous working conditions. Am J Ind Med.  
1132 2022;65:92–104.  
1133 120. Mohai P, Pellow D, Roberts JT. Environmental justice. Annu Rev Environ Resour.  
1134 2009;34:405–30.  
1135 121. DuPont-Reyes MJ, Hernandez-Munoz JJ, Tang L. TV Advertising, Corporate Power, and  
1136 Latino Health Disparities. Am J Prev Med [Internet]. 2022;63:496–504. Available from:  
1137 [https://www.scopus.com/inward/record.uri?eid=2-s2.0-](https://www.scopus.com/inward/record.uri?eid=2-s2.0-85132157505&doi=10.1016%2Fj.amepre.2022.04.017&partnerID=40&md5=fcb2ff4891b741d88f37c7b64fc9c47e)  
1138 [85132157505&doi=10.1016%2Fj.amepre.2022.04.017&partnerID=40&md5=fcb2ff4891b741d8](https://www.scopus.com/inward/record.uri?eid=2-s2.0-85132157505&doi=10.1016%2Fj.amepre.2022.04.017&partnerID=40&md5=fcb2ff4891b741d88f37c7b64fc9c47e)  
1139 [8f37c7b64fc9c47e](https://www.scopus.com/inward/record.uri?eid=2-s2.0-85132157505&doi=10.1016%2Fj.amepre.2022.04.017&partnerID=40&md5=fcb2ff4891b741d88f37c7b64fc9c47e)  
1140 122. N. R, B. R, Charlton K. AO - Rose NO <https://orcid.org/0000-0002-2640-0198>, Rose N,  
1141 Reeve B, Charlton K. Barriers and Enablers for Healthy Food Systems and Environments: The  
1142 Role of Local Governments. Curr Nutr Rep [Internet]. 2022;11:82–93. Available from:  
1143 [https://www.scopus.com/inward/record.uri?eid=2-s2.0-](https://www.scopus.com/inward/record.uri?eid=2-s2.0-85124667572&doi=10.1007%2Fs13668-022-00393-5&partnerID=40&md5=24fc56940ecb34b55442d31adfd30a81)  
1144 [85124667572&doi=10.1007%2Fs13668-022-00393-](https://www.scopus.com/inward/record.uri?eid=2-s2.0-85124667572&doi=10.1007%2Fs13668-022-00393-5&partnerID=40&md5=24fc56940ecb34b55442d31adfd30a81)  
1145 [5&partnerID=40&md5=24fc56940ecb34b55442d31adfd30a81](https://www.scopus.com/inward/record.uri?eid=2-s2.0-85124667572&doi=10.1007%2Fs13668-022-00393-5&partnerID=40&md5=24fc56940ecb34b55442d31adfd30a81)  
1146 123. Ireland R, Bunn C, Reith G, Philpott M, Capewell S, Boyland E, et al. Commercial  
1147 determinants of health: Advertising of alcohol and unhealthy foods during sporting events. Bull  
1148 World Health Organ [Internet]. 2019;97:290–5. Available from:  
1149 <https://www.who.int/bulletin/volumes/97/4/18-220087.pdf>

1150 124. Klein DE, Lima JM. The Prison Industrial Complex as a Commercial Determinant of Health.  
1151 Am J Public Health. 2021;111:1750–2.

1152 125. Hyder AA, Werbick M, Scannelli L, Paichadze N. The COVID-19 pandemic exposes another  
1153 commercial determinant of health: The global firearm industry. Glob Health Sci Pract [Internet].  
1154 2021;9:264–7. Available from: [www.ghspjournal.org](http://www.ghspjournal.org)

1155 126. Jamieson L, Kearns C, Ankeny R, Hedges J, Thomson WMM, L. J, et al. Neoliberalism and  
1156 Indigenous oral health inequalities: a global perspective. Community Dent Health [Internet].  
1157 2021;38:44–7. Available from:  
1158 <http://ovidsp.ovid.com/ovidweb.cgi?T=JS&PAGE=reference&D=emed22&NEWS=N&AN=63414>  
1159 1422

1160 127. Diderichsen F, Dahlgren G, Whitehead M. Beyond “commercial determinants”: Shining a  
1161 light on privatization and political drivers of health inequalities. Eur J Public Health [Internet].  
1162 2021;31:672–3. Available from:  
1163 <http://ovidsp.ovid.com/ovidweb.cgi?T=JS&PAGE=reference&D=emed22&NEWS=N&AN=63535>  
1164 1125

1165 128. Hill SE, Johns P, Nakkash RT, Collin J. From silos to policy coherence: tobacco control,  
1166 unhealthy commodity industries and the commercial determinants of health. Tob Control  
1167 [Internet]. 2022;31:322–7. Available from: [https://www.scopus.com/inward/record.uri?eid=2-](https://www.scopus.com/inward/record.uri?eid=2-s2.0-85125691950&doi=10.1136%2Ftobaccocontrol-2021-057136&partnerID=40&md5=eaf9dd75ae1ce88ae3e426ec832340ba)  
1168 [s2.0-85125691950&doi=10.1136%2Ftobaccocontrol-2021-](https://www.scopus.com/inward/record.uri?eid=2-s2.0-85125691950&doi=10.1136%2Ftobaccocontrol-2021-057136&partnerID=40&md5=eaf9dd75ae1ce88ae3e426ec832340ba)  
1169 [057136&partnerID=40&md5=eaf9dd75ae1ce88ae3e426ec832340ba](https://www.scopus.com/inward/record.uri?eid=2-s2.0-85125691950&doi=10.1136%2Ftobaccocontrol-2021-057136&partnerID=40&md5=eaf9dd75ae1ce88ae3e426ec832340ba)

1170 129. Boatwright M, Lawrence M, Russell C, Russ K, McCoy D, Baker P. The Politics of Regulating  
1171 Foods for Infants and Young Children: A Case Study on the Framing and Contestation of Codex  
1172 Standard-Setting Processes on Breast-Milk Substitutes. Int J Health Policy Manag [Internet].  
1173 2022;11:2422–39. Available from:  
1174 <http://ovidsp.ovid.com/ovidweb.cgi?T=JS&PAGE=reference&D=emexa&NEWS=N&AN=6369750>  
1175 55

1176 130. McCambridge J, Coleman R, McEachern J. Public health surveillance studies of alcohol  
1177 industry market and political strategies: A systematic review. J Stud Alcohol Drugs [Internet].  
1178 2019 [cited 2023 Feb 20];80:149–57. Available from:  
1179 <https://www.jsad.com/doi/10.15288/jsad.2019.80.149>

1180 131. Legg T, Hatchard J, Gilmore AB. The Science for Profit Model—How and why corporations  
1181 influence science and the use of science in policy and practice. PLoS One [Internet]. 2021 [cited  
1182 2023 Feb 20];16:e0253272. Available from:  
1183 <https://journals.plos.org/plosone/article?id=10.1371/journal.pone.0253272>

1184 132. World Benchmarking Alliance. Methodology for the Food and Agriculture Benchmark.  
1185 2021;

1186 133. Sacks G, Vanderlee L, Robinson E, Vandevijvere S, Cameron AJ, Ni Mhurchu C, et al. BIA-  
1187 Obesity (Business Impact Assessment—Obesity and population-level nutrition): A tool and  
1188 process to assess food company policies and commitments related to obesity prevention and  
1189 population nutrition at the national level. Obesity Reviews. 2019;20:78–89.

1190 134. Robertson C. The Money Blind: How to Stop Industry Bias in Biomedical Science, Without  
1191 Violating the First Amendment. American Journal of Law and Medicine 358 [Internet]. 2011;  
1192 Available from: [https://scholarship.law.bu.edu/faculty\\_scholarship/1117](https://scholarship.law.bu.edu/faculty_scholarship/1117)

1193 135. Israel BA, Schulz AJ, Parker EA, Becker AB. Community-based participatory research: Policy  
1194 recommendations for promoting a partnership approach in health research. Education for  
1195 Health. 2001;14:182–97.  
1196
