1  
2  
3  
4  
5  
6  
7  
8  
9  
10  
11  
12  
13  
14  
15  
16  
17  
18  
19  
20  
21  
22  
23  
24  
25  
26  
27  
28  
29  
30  
31  
32  
33  
34  
35  
36  
37

**Corporate activities that influence population health:  
A scoping review and qualitative synthesis to develop  
the HEALTH-CORP typology**

Raquel Burgess, MPhil MSc<sup>1</sup>; Kate Nyhan, MLS<sup>2</sup>; Nicholas Freudenberg, MPH DrPH<sup>3</sup>; Yusuf Ransome, MPH DrPH<sup>1</sup>

<sup>1</sup>Department of Social and Behavioral Sciences, Yale School of Public Health, 60 College Street, New Haven, Connecticut 06510, United States of America

<sup>2</sup>Harvey Cushing/John Hay Whitney Medical Library, Yale University, 333 Cedar Street, New Haven, Connecticut 06510, United States of America; Department of Environmental Health Sciences, Yale School of Public Health, 60 College Street, New Haven, Connecticut 06510, United States of America

<sup>3</sup>Department of Community Health and Social Sciences, CUNY Graduate School of Public Health & Health Policy, 55 W 125<sup>th</sup> Street, New York City, New York 10027, United States of America

Corresponding Author:

Raquel Burgess, MSc MPhil  
Dept of Social and Behavioral Sciences  
Yale School of Public Health  
60 College St, New Haven CT 06510  
[Raquel.burgess@yale.edu](mailto:Raquel.burgess@yale.edu)

38 **Introduction:** The concept of the commercial determinants of health (CDH) is used to study the  
39 actions (and associated structures) of commercial entities that influence population health and  
40 health equity. The aim of this study was to develop a typology that describes the diverse set of  
41 activities through which corporations influence population health and health equity across  
42 industries.

43  
44 **Methods:** We conducted a scoping review of articles using CDH terms (n=116) that discuss  
45 corporate activities that can influence population health and health equity across 16 industries.  
46 We used the qualitative constant comparison method to build a typology called the Corporate  
47 Influences on Population Health (HEALTH-CORP) typology.

48  
49 **Results:** The HEALTH-CORP typology identifies 70 corporate activities that can influence health  
50 across industries and categorizes them into seven domains of corporate influence (e.g., political  
51 practices, employment practices). We present a model that situates these domains based on  
52 their proximity to health outcomes and identify five population groups (e.g., workers, local  
53 communities) to consider when evaluating corporate health impacts.

54  
55 **Discussion:** The HEALTH-CORP typology facilitates an understanding of the diverse set of  
56 corporate activities that can influence population health and the population groups affected by  
57 these activities. We discuss the utility of these contributions in terms of identifying  
58 interventions to address the CDH and advancing efforts to measure and monitor the CDH. We

59 also leverage our findings to identify key gaps in CDH literature and suggest avenues for future  
60 research.

61

62 **List of abbreviations:**

63 CDH: Commercial determinants of health

64 SDH: Social determinants of health

65 HEALTH-CORP: Corporate Influences on Population Health

66 PRISMA-ScR: PRISMA Extension for Scoping Reviews

67 CSR: Corporate Social Responsibility

68 CDC: Centers for Disease Control and Prevention

69 HICs: High-income countries

70 LMICs: Low- and middle-income countries

71 F&B: Food and beverage

72

## 73 **Introduction**

74

75 For centuries, commercial actors and the structures that govern them have shaped the health  
76 of various populations in profound ways [1]. Growing attention to this influence recognizes the  
77 increasing economic, political, and legal power wielded by corporations, especially those that  
78 operate transnationally. In the past two decades, scholars have studied this issue through the  
79 lens of the ‘commercial determinants of health’ (CDH). In a recent *Lancet*-commissioned series  
80 on the topic, the CDH were defined as “the systems, practices, and pathways through which  
81 commercial actors drive health and equity” [2].

82

83 Gilmore and colleagues [2] provide us with a detailed summary of the CDH literature to-date  
84 and proposed a conceptual model for understanding how the CDH influence population health  
85 outcomes. Drawing on existing models of the political and social determinants of health (SDH),  
86 their model highlights the ways that corporate practices (e.g., political practices, financial  
87 practices) exert influence on the political and economic system, which have downstream  
88 impacts on SDH such as housing, labour, as well as on the natural environment. Gilmore and  
89 colleagues highlight how the maldistribution of power between the private and public sector  
90 creates current “pathological” economic and political systems that favour the interests of  
91 commercial entities, often at the expense of health and equity [2].

92

93 We conducted a scoping review and qualitative synthesis of 116 CDH articles discussing  
94 corporate activities with the potential to influence population health and health equity.

95 Leveraging the findings from this process, we offer three distinct contributions that add to  
96 existing literature [2–8]. First, we develop a typology (called the Corporate Influences on Health  
97 (HEALTH-CORP) typology) that identifies 70 specific corporate activities with the potential to  
98 influence human health across industries and categorizes these activities into seven domains of  
99 corporate influence (e.g., political practices, products and services). Second, we situate the  
100 domains based on their proximity to health outcomes (i.e., distal to proximal) and propose five  
101 population groups to consider when evaluating the health impact of corporate practices. Our  
102 third contribution is to use our findings to illuminate current gaps in CDH research.

103

104 In the following sections, we report our review methods and describe how we used the  
105 literature to build the HEALTH-CORP typology. We summarize the activities we identified as  
106 relevant to the seven domains of influence and five population groups. We conclude by  
107 discussing the utility of these contributions and identifying avenues for future CDH research.

108

## 109 **Methods**

110 We used scoping review methodology to find relevant literature and qualitative synthesis to  
111 build the typology. Scoping review methodology is preferred when examining emerging fields  
112 of research and consolidating key factors related to a particular concept [9]. Likewise,  
113 qualitative synthesis is useful for systematically interpreting research to identify and represent  
114 its meaning [10]. We report our methods and findings in accordance with the PRISMA extension  
115 for scoping reviews (PRISMA-ScR) [11]. No study protocol was registered.

116

117 **Search strategy**

118 We consulted prior work by de Lacy-Vawdon and Livingstone [12] to build our search. We  
119 expanded the scope of prior searches for CDH terms ((commercial OR corporate) AND  
120 determinant\* AND (health OR disease\*)), to include related terms such as “corporate political  
121 activity” and “morbidity” (Additional File 1, Appendix 1). At the full-text screening stage, we  
122 then excluded articles that did not specifically mention CDH terms (i.e., “commercial  
123 determinants”, “corporate determinant(s)”). The purpose was to identify as many related  
124 articles as possible, including those that did not use CDH terms in their title, abstract, or  
125 keywords, but nevertheless used CDH terms in the full text. We searched Scopus, OVID  
126 Medline, Ovid Embase, and Ovid Global Health with no date restrictions on Jan 4, 2022 and  
127 again on Sept 13, 2022.

128

129 **Eligibility criteria**

130 Eligible articles described activities (i.e., decisions, strategies, or other actions) that  
131 corporations or those acting on behalf of corporations engage in that have been demonstrated  
132 to or have the potential to influence population health and/or health equity. This criterion was  
133 applied broadly to identify as many relevant activities as possible; the potential to influence  
134 population health and/or health equity could have been investigated explicitly within the  
135 respective study, supported by previous research (for e.g., changes to income are known to  
136 influence health), or reasonably be expected to influence population health (e.g., delayed

137 implementation of evidence-based health policy due to corporate influence). Moreover, the  
138 expected impact on health could be direct (e.g., occupational injury), indirect (e.g., decreased  
139 health protections due to corporate lobbying), health-promoting (e.g., provision of income), or  
140 health-adverse (e.g., harmful product), or some combination of these categories.

141 Articles were excluded if the full text was not available in English and if the title, abstract,  
142 keywords, or full text did not contain CDH terms (excluding the reference list). Full-length books  
143 were also excluded.

144

#### 145 **Screening**

146 Following manual and software-assisted (via Mendeley [13] reference management software)  
147 de-duplication, the first author (R.B.) screened the titles and abstracts in Rayyan [14], a web  
148 service for organizing reviews. We did not employ double, independent screening for  
149 verification purposes. Full texts were retrieved for eligible records. Then, EndNote's [15] 'Smart  
150 Group' feature was used to screen for articles that use CDH terms.

151

#### 152 **Data analysis**

153 Using the qualitative data analysis software NVivo 12 [16], the first author (R.B) employed the  
154 constant comparative method to inductively code the data with the goal of identifying relevant  
155 corporate activities and arranging them into overarching descriptive domains [17,18].

156 Specifically, examples of corporate activities discussed in the included texts (e.g., corporate

157 involvement in nutrition education in schools [19]) were coded and compared to other relevant  
158 examples (e.g., corporate provision of resources on breastfeeding for mothers [20]), to identify  
159 overarching activities (e.g., corporate involvement in health education directed at the public).  
160 These activities were then grouped into larger descriptive categories (e.g., preference and  
161 perception shaping practices), which we call ‘domains of corporate influence’. In the final  
162 typology, specific activities were included if they had been described in a general sense in the  
163 included literature or discussed in relation to two or more industries.

164 Drawing on the findings of this analysis, other CDH work [2,3,6,7], and the work of relevant civil  
165 society organizations [21,22], the first author (R.B.) then developed a model to describe the  
166 interdependencies between domains and their proximity to health outcomes in consultation  
167 with the third author (N.F.). This included identifying five population groups whose health is  
168 affected by corporate activities (i.e., consumers, workers, disadvantaged groups, vulnerable  
169 groups, and local communities).

170  
171 **Critical appraisal**

172  
173 Consistent with scoping review methodology [23], a formal quality assessment of articles was  
174 not performed.

175  
176  
177  
178  
179  
180  
181



182 **Results**

183 **Article Screening**

184 7910 records were identified during the initial search, 4924 of which remained after de-  
185 duplication. Following title and abstract screening, 430 full texts were sought and 412 were  
186 found. 248 articles were excluded based on screening for use of CDH terms. Of the remaining  
187 164 articles, 74 were included. Another 42 articles were included when the search was  
188 conducted a second time for a total of 116 included articles (Figure 1).

189

190 **Characteristics of Included Articles**

191 Almost half of the articles included were conceptual (50 articles; 43%) and a substantial  
192 proportion employed qualitative methods (37; 32%). Fifty eight percent (67 articles) focused on  
193 the food and beverage, tobacco, and alcohol industries, with less research dedicated to  
194 studying other industries (e.g., social media, gambling, fossil fuels). Of the 58 included articles  
195 that reported a regional focus, 72% (42 articles) studied corporate activities in high-income  
196 countries (HICs), such as United States, United Kingdom, or Australia. Detailed descriptions of  
197 the characteristics of the included literature are reported in our previous work [24]. Individual  
198 article characteristics are provided in Additional File 1, Appendix 2.

Figure 1. PRISMA Diagram

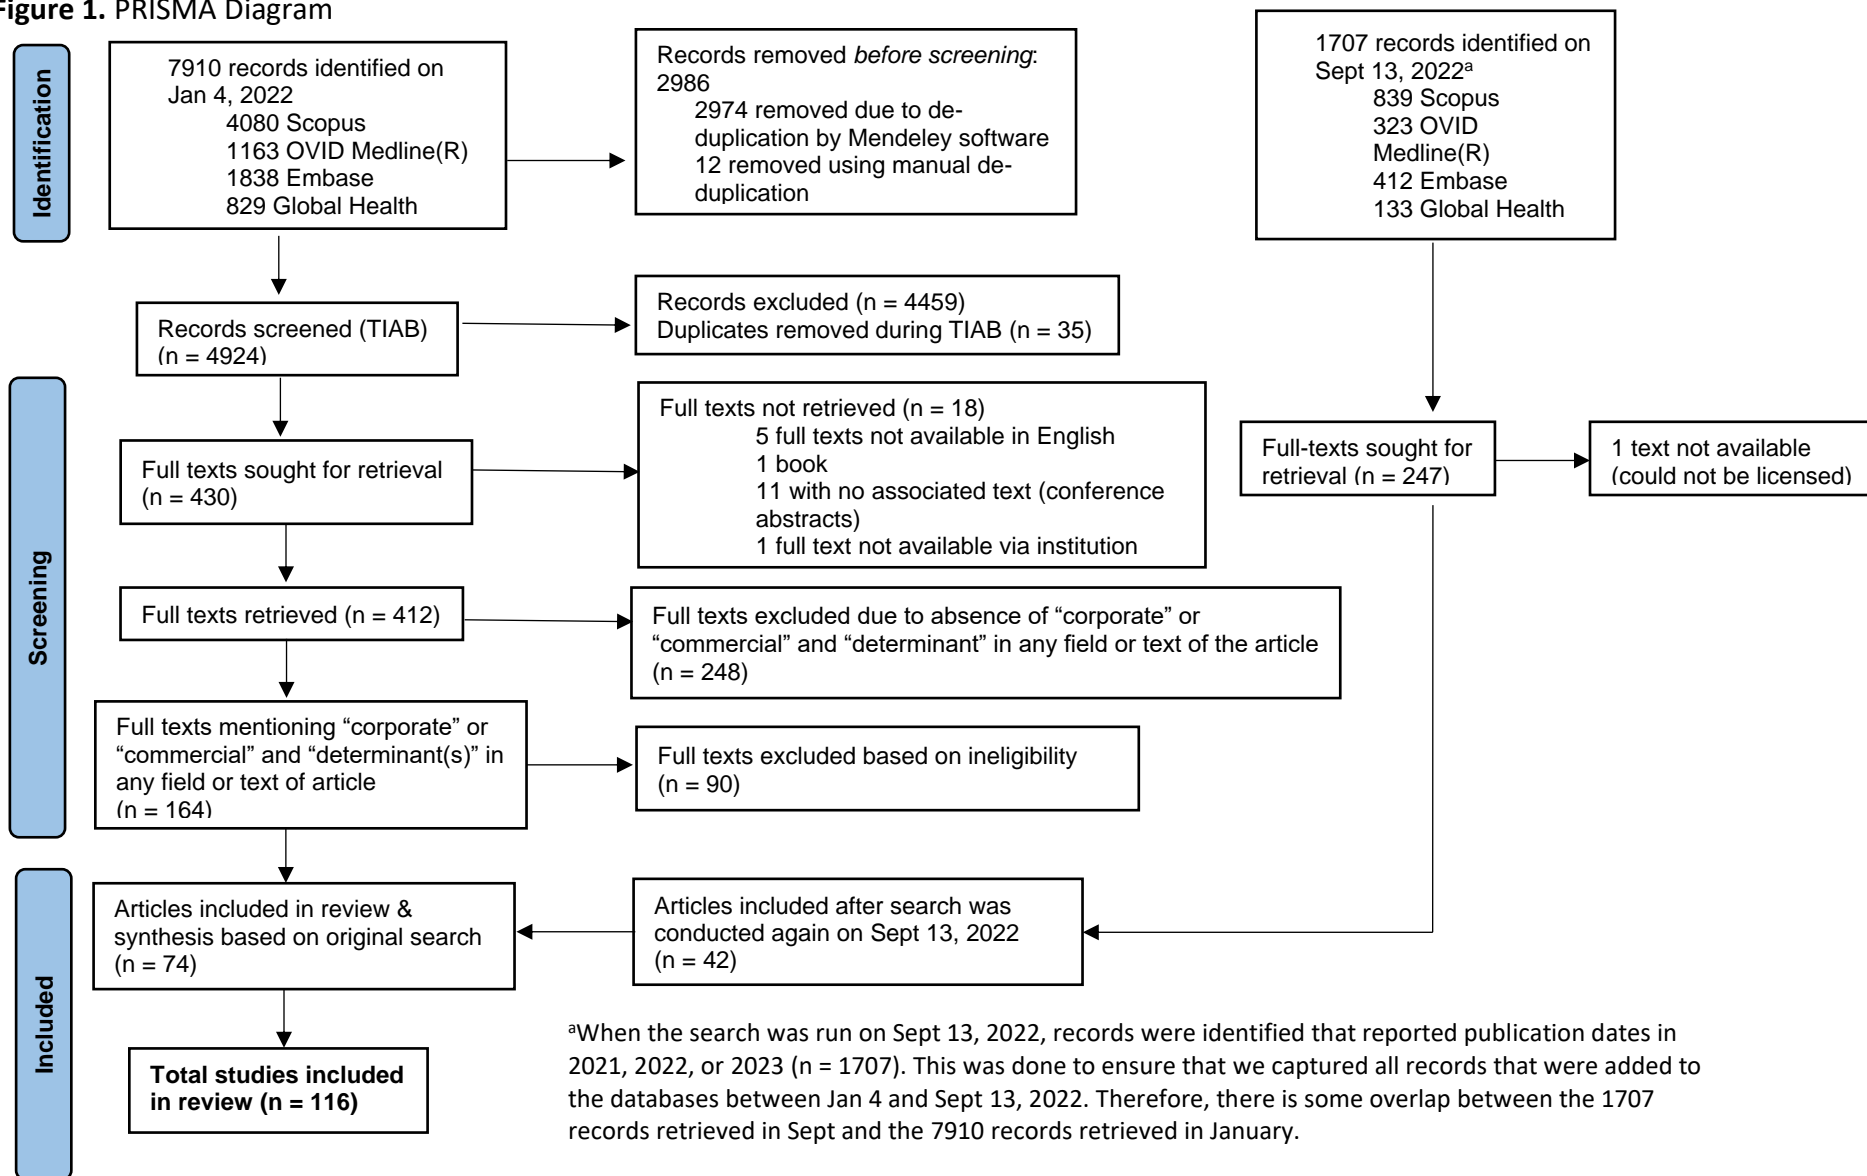

## 228 **Corporate Influences on Population Health (HEALTH-CORP)**

229 We identified seven domains of corporate influence, which are: 1) political practices, 2)  
230 preference and perception shaping practices, 3) corporate social responsibility practices, 4)  
231 economic practices, 5) products & services, 6) employment practices, and 7) environmental  
232 practices (Table 1).

233 In Figure 2, we provide a graphical depiction of the domains. We showed that several domains  
234 overlap and are interactive (portrayed by positioning the domains in boxes without inter-  
235 domain boundaries). For example, some activities (e.g., ‘engage in efforts to influence the  
236 public’s perception of health policies’) contain elements of both preference and perception  
237 shaping practices and political strategies (overlapping). Other activities (e.g., obscuring conflicts  
238 of interest in research) could strengthen activities in other domains (e.g., misrepresenting  
239 evidence in policy submissions) (interactive).

240 Political practices, preference & perception shaping practices, and economic practices are  
241 positioned as distal domains (i.e., their impact on population health is indirect). Employment  
242 practices, products and services, and environmental practices are positioned as proximal  
243 domains (i.e., their impact on population health is direct). A double-headed arrow between the  
244 proximal and distal domains suggest that the distal domains enable the proximal domains and  
245 the proximal domains reinforce the distal domains. That is, by shaping the political, normative,  
246 epistemic, and economic environment in favourable ways, corporations are able to influence  
247 the conditions in which they operate (e.g., the environmental impacts for which they are held

248 accountable) [2]. In turn, the proximal domains can simultaneously influence the extent to  
249 which commercial entities can engage in the distal domains. For example, transnational  
250 companies can leverage their employment of large numbers of people (employment practices)  
251 to impose pressure on political and judicial processes (political practices), as was the case with  
252 the SNC-Lavalin scandal in Canada in 2019 [25]. Likewise, pharmaceutical companies were able  
253 to leverage their production of necessary products to advocate for reduced liability for product-  
254 related harms in the United States [26].

255 Finally, based on our review of the literature and other relevant sources [21,22], we identified  
256 five broad population groups that have been consistently studied to assess the impact of  
257 corporate activities on population health. These are consumers, workers, disadvantaged  
258 groups, vulnerable groups, and local communities located near a production or processing  
259 facility (Table 2). These five overlapping groups and the activities that influence their health are  
260 described in the section ‘Health Impact on Populations’.

261 In the next section, we describe the activities that comprise each domain and report the ways  
262 these activities were discussed in the included literature. The number of references pertaining  
263 to a specific activity should not be interpreted as an indication of the strength of associated  
264 evidence, but rather the number of instances the respective activity was discussed in the  
265 included articles. Our descriptions of the activities in the political and preference and  
266 perception shaping practices domains are brief as these practices have been discussed in detail  
267 elsewhere [3,4,6,7]. The HEALTH-CORP typology is presented in Table 2 (see end of document)  
268 and an expanded version with additional details is provided in Additional File 1, Appendix 3.

269

270 **Figure 2.** A Model Depicting the Domains of Corporate Influence, their Proximity to Health Outcomes, and the Relevant  
271 Population Groups  
272

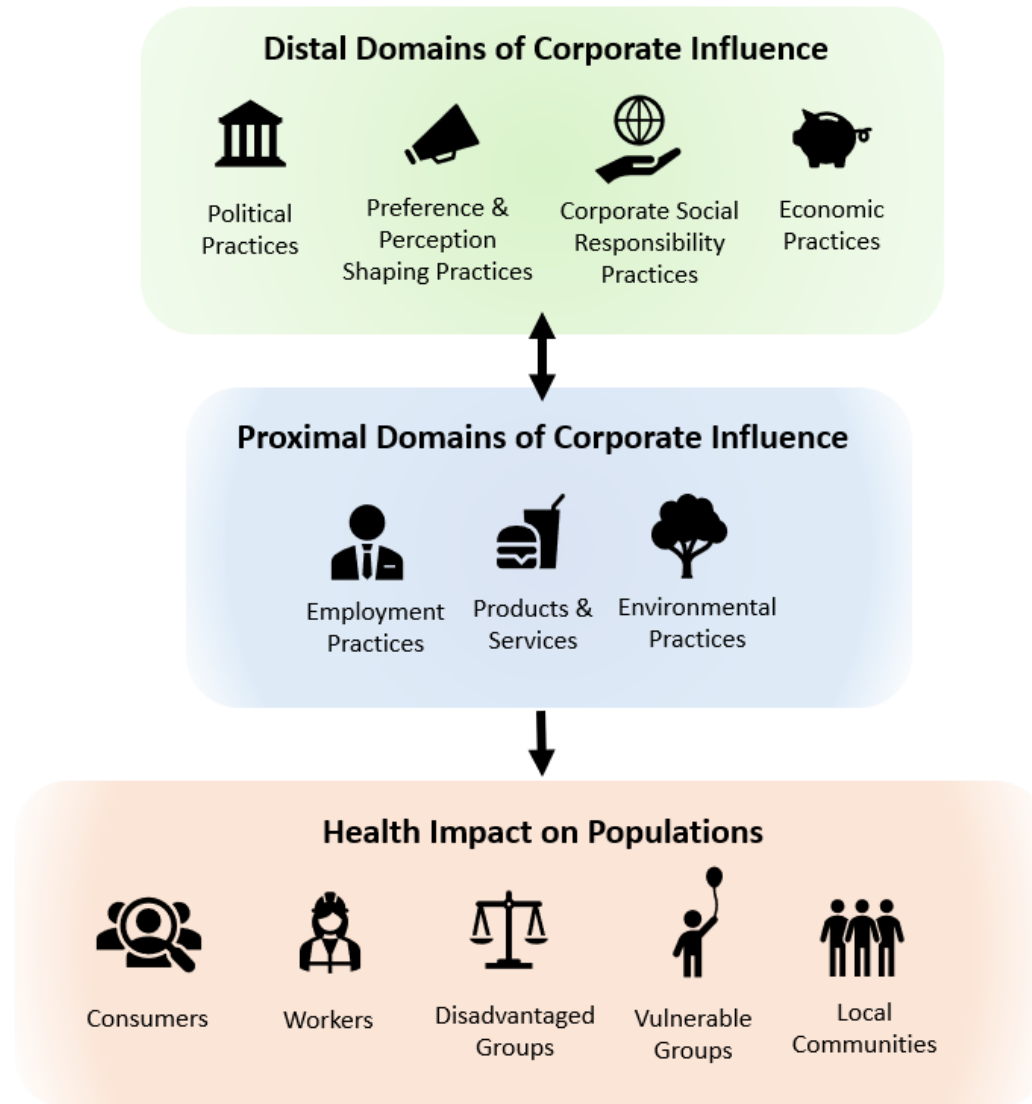

273  
274  
275  
276  
277  
278  
279  
280  
281  
282  
283  
284  
285  
286  
287  
288  
289  
290  
291  
292  
293  
294  
295  
296  
297  
298

299

300

301

**Table 1.** Definitions of Domains of Corporate Influence

| Domains of Corporate Influence                                                                                                 | Definition                                                                                                                                                                           |
|--------------------------------------------------------------------------------------------------------------------------------|--------------------------------------------------------------------------------------------------------------------------------------------------------------------------------------|
| Political Practices<br>                       | This domain consists of activities undertaken to influence government policy or processes in ways that are favourable to the commercial entity [6].                                  |
| Preference & Perception Shaping Practices<br> | This domain consists of activities that shape preferences for products and/or influence perceptions about products and their health-related harms [6].                               |
| Corporate Social Responsibility Practices<br> | This domain consists of activities undertaken with the stated intention to contribute to society and/or offset environmental, social, or health impacts of previous activities [27]. |
| Economic Practices<br>                        | This domain consists of activities that influence the economy and the distribution of wealth within society [8].                                                                     |
| Products & Services<br>                       | This domain consists of activities related to the production and sale of products and services [28].                                                                                 |
| Employment Practices<br>                    | This domain consists of activities related to the conditions under which employment is provided [29].                                                                                |
| Environmental Practices<br>                 | This domain consists of activities that can influence physical and/or mental health through the impact of the activity on the natural environment [30].                              |

302

303 **Distal Domains of Corporate Influence**

304 *Political Practices*

305 Corporate involvement in the development and implementation of health policy was a  
306 significant focus of many of the included articles and a wide range of corporate strategies were  
307 discussed. Corporations were reported to engage in efforts to secure a favourable policy  
308 environment, for instance, by contributing to political parties [12,18,20,31–44] and developing  
309 relationships with public health institutions [20,27,32,37,45–51]. For example, Maani and  
310 colleagues [46] used Freedom of Information Act Requests to access emails between *the Coca*  
311 *Cola Company* and the *Centers for Disease Control and Prevention* (CDC). They demonstrated  
312 that *Coca Cola* successfully built a relationship with a senior CDC official, which they leveraged  
313 in an attempt to avoid restrictions on sugar-sweetened beverages supported by the *World*  
314 *Health Organization*.

315 Corporate strategies to stop, delay, or weaken proposed health policies were also frequently  
316 discussed. For example, corporations were reported to push for self-regulation schemes  
317 [12,18,20,27,31,32,39,49,51–68] and to threaten litigation and/or use existing trade treaties to  
318 challenge proposed health legislation [19,67,69–74]. They were reported to engage in a wide  
319 breadth of argumentative strategies to challenge proposed health policies. For example,  
320 corporations suggested that policies were redundant, conflicting, or misaligned with other  
321 regulations or international norms [45,49,52–54,69,75]. Arguments about the impacts of the  
322 policy on the economy, employment, equity, and poverty were also common [19,20,31,52–

323 55,63,65,67,71,74,76–80], and economic arguments were considered to be particularly  
324 persuasive in low-and-middle income countries (LMICs) [19,67,74]. Many articles also discussed  
325 the use of front groups as a way to distance the corporation from its unsavoury activities (e.g.,  
326 lobbying against health policies) [18,19,32,42,44,48,52,59,63,72,74,81–83].

327

### 328 *Preference & Perception Shaping Practices*

329 The ways in which corporations shape preferences for products and influence perceptions  
330 about their health-related risks was another major topic of the included articles. Corporations  
331 were accused of promoting excessive consumption of harmful products, for example, by  
332 engaging in intensive and highly-resourced marketing campaigns that normalize their  
333 consumption (e.g., portraying alcohol as part of a normal everyday routine [84])  
334 [12,18,36,42,47,51,63,65,72–74,84–99]. They were reported to influence the public debate  
335 about product related-risks by reframing and creating uncertainty about the causes of health  
336 issues (e.g., focusing on genetic causes of cancer as opposed to alcohol consumption [100])  
337 [18,20,27,28,31,32,34,36,37,40–42,44,46,48,50–52,56–58,64,65,75,76,79,81,101–104] and  
338 acquiring or funding media companies, making it more difficult for public health messages to be  
339 heard [20,45,48,49,65,72]. Though commercial entities promoted education as the solution to  
340 managing health-related risks [20,45,51,58,66,68,74,80], they were also accused of attempting  
341 to shape the public’s understanding of health issues by providing educational resources that  
342 promoted their products and/or downplayed the associated health risks (e.g., alcohol [61,62])  
343 [19,20,36,51,63,65,68,80,84,100].



344 Similarly, commercial actors were accused of promoting products to health professionals by,  
345 for example, delivering educational initiatives to health professionals (e.g., the breast-milk  
346 substitute (BMS) industry’s funding of medical student retreats [42]) [18–20,49,51,65,80] and  
347 influencing the development of clinical standards (e.g., BMS industry’s funding of clinical  
348 guidelines for the diagnosis of cows-milk protein allergy [91]) [48,78,91,97,105]. Corporations  
349 were also reported to influence the academic debate and the production of science by, for  
350 example, by funding universities, think tanks, and scientific conferences, providing scientific  
351 awards, developing industry research institutes and suppressing research that is not aligned  
352 with their interests (e.g., failing to publish research on health harms of products)  
353 [19,20,32,42,46,48,49,51,64,66–68,72,75,80].

354

### 355 *Corporate Social Responsibility (CSR) Practices*

356 CSR initiatives mentioned in the literature include corporate involvement in health promotion  
357 programs and contributions to health charities and causes (e.g., tobacco industry’s funding of  
358 HIV initiatives [44]; alcohol industry’s involvement in road safety [37])  
359 [18,19,27,37,39,42,44,51,67,72,91,97,106], some of which had limited evidence of  
360 effectiveness [18,27,39,44,72]. Others described CSR initiatives that have implications for  
361 health (e.g., diversity, equity, and inclusion efforts) [19,27,39,44,67,68]. Corporations were  
362 sometimes reported to exploit existing social movements (e.g., women’s rights [61]) to sell  
363 products [27,50,61] or engage in product reformulation (e.g., ‘light’ cigarettes [48]) to suggest  
364 that the company is taking action on product-related harms [12,18,36,51,68,92].

365 Overall, CSR was perceived critically and was seen as being closely related to political practices  
366 and preference and perception shaping practices. That is, CSR efforts were seen as attempts to  
367 distract from corporate harms [12,18,27,44,48,75,107], shift blame [68,75], enhance brand  
368 image and credibility [19,36,44,67,84], influence policymaking [19,37,44,48,68,71], and/or pre-  
369 emptively address threats to business practices [55]. In some cases, these strategic uses of CSR  
370 were described by corporations in leaked company documents [48]. Millar [62] suggested that  
371 ‘good’ corporations engage in CSR efforts genuinely.

372

### 373 *Economic Practices*

374 Externalization of health harms, for example, through tax avoidance  
375 [1,36,38,40,41,43,48,62,65,72,86,107–109], was another major topic of the included articles. In  
376 this way, corporations were reported to impose health harms onto populations (e.g., chronic  
377 disease) without paying for the full cost of these harms. Large monopolies were seen as  
378 harmful because they concentrate economic power in one or a few actors, leading to more  
379 powerful lobbying efforts [43]. Mendly-Zambo, Raphael, & Taman [106] also discussed the price  
380 fixing tactics of *Walmart Canada* and its contributions to food insecurity. Millar [62] described  
381 how ‘good’ corporations pay their fair share of taxes and contribute to economic growth.

382

383

384

385

386

387

388

389 **Proximal Domain of Corporate Influence**

390 *Products and Services*

391 Several products (e.g., alcohol, tobacco, and gambling machines) were widely recognized as  
392 promoting harm. Many authors discussing products referred to their wide availability and  
393 accessibility [36,74,88,98,110,111]. For example, the ubiquity of fast-food outlets and the  
394 provision of free BMS in clinics was seen as increasing consumption of these products  
395 [36,74,88,110,111]. The features of products were also discussed, such as the hyper-palatable  
396 nature of ultra-processed foods [93] and the hyper-engagement features of social media (e.g.,  
397 endless scroll) [64], which were seen as promoting behaviour some authors described as  
398 addictive. Liber [112] discussed some health-promoting products (e.g., vaccines) and suggested  
399 that regulation focus on expanding these markets while contracting the markets for health-  
400 harming products (e.g., alcohol).

401

402 *Employment Practices*

403 Employment practices were not discussed in depth in the included articles. Most articles that  
404 discussed employment did so in passing, with reference to health harming practices such as  
405 unsafe working conditions, inadequate pay, and limited access to benefits (e.g., parental leave,  
406 medical care) [1,12,18,40,41,43,62,65,79,106,113]. Loewenson [113] provided the deepest  
407 discussion of employment by describing the global trend towards precarious labour and  
408 associated health effects such as social isolation, high blood pressure, and mental ill-health.  
409 Mendly-Zambo, Raphael, and Taman [106] described how *Walmart Canada's* employment

410 practices (e.g., low wages, anti-union activities) contributed to food insecurity in Canada. In  
411 contrast, Millar [62] suggested that ‘good’ businesses create jobs that can have a beneficial  
412 effect on human health and described health-promoting activities such as adequate workplace  
413 mental health policies.

414

415 *Environmental Practices*

416 Health concerns related to environmental practices were not also not a significant topic of the  
417 included articles. Activities that were mentioned include chemical and pesticide use, air and  
418 water pollution, land clearing/deforestation, ecosystem disruption, consumption of energy and  
419 water, production of waste, contributions to greenhouse gases, and contributions to  
420 biodiversity loss [1,12,43,62,65,79]. Kadandale, Marten, and Smith [79] described how slash-  
421 and-burn land clearing practices used by the palm oil industry created episodes of harmful haze  
422 in South-East Asia, which led to thousands of premature deaths and increases in the rates of  
423 respiratory, eye, and skin diseases. Montiel [114] described the health harms of deforestation  
424 by pointing to reports that land clearing in Indonesia by the palm oil and sugar industries led to  
425 the emergence of the Nipah virus through zoonosis (transfer of a virus from animals to  
426 humans).

427

428

429

430

431

432

433 **Health Impact on Populations**

434

435 Guided by the literature, we describe the domains which are relevant to each of the five

436 identified population groups (Table 3). We also describe specific activities relevant to each

437 group that were discussed within the included literature.

438

439

440

441

442

443 **Table 3.** Population Groups Affected by Corporate Activities

444

| Group Whose Health is Impacted                                                                                     | Definition of Group                                                                                                                                                                                                                                                                     |
|--------------------------------------------------------------------------------------------------------------------|-----------------------------------------------------------------------------------------------------------------------------------------------------------------------------------------------------------------------------------------------------------------------------------------|
| <b>Consumers</b><br>              | Consumers are defined as individuals who buy goods or services produced and/or sold by commercial entities [115].                                                                                                                                                                       |
| <b>Workers</b><br>              | Workers are defined as individuals who are employed (permanently, contractually, or otherwise) for commercial entities or within their supply chain [116].                                                                                                                              |
| <b>Disadvantaged Groups</b><br> | Disadvantaged populations are defined as individuals who are socially, economically, or culturally disadvantaged due to current and/or historical factors (e.g., people of colour, Indigenous populations, migrant populations, women, individuals of low socioeconomic status,) [117]. |
| <b>Vulnerable Groups</b><br>    | Vulnerable groups are defined as groups that are vulnerable due to their age, life stage, or other factors (e.g., children, pregnant persons, older adults, people with disabilities) [21].                                                                                             |
| <b>Local Communities</b><br>    | Local communities are defined as persons living in communities in which corporations are operating (i.e., those affected by physical proximity to corporate operations) [8].                                                                                                            |

445

446

447

448

449

450

451

452

453 *Consumers*

454 Consumers, by their nature, are influenced by the properties of consumer goods (products and  
455 services). Political and preference and perception shaping practices influence consumers'  
456 health indirectly by creating and shaping the markets for these goods. For example, aggressive  
457 marketing can increase the demand for harmful products (e.g., ultra-processed foods) while  
458 lobbying and political financing may limit associated protections (e.g., nutrition labelling [49]).

459

460 *Workers*

461 The activities influencing the health of workers are, unsurprisingly, those identified in the  
462 employment practices domain. These activities shape the opportunities the worker has to  
463 obtain optimal health (e.g., access to medical benefits) and their exposure to harmful or  
464 salutogenic factors (e.g., pesticides, positive work environments) [118]. Some political practices  
465 (e.g., threatening to shift operations to a country with weaker labour standards) may also  
466 impact workers (i.e., through placing downward pressure on labour regulations).

467

468

469 *Disadvantaged Groups*

470

471 Disadvantaged groups are more likely to be employed in precarious and unsafe jobs [119] and  
472 therefore are likely to be strongly affected by employment practices. These groups may also  
473 experience the greatest burden from economic practices such as unfair tax practices that

474 reduce funds for social programs. Environmental practices and preference and perception  
475 shaping practices are also relevant to these groups [120,121].

476 Specific activities described in the literature include disproportionate marketing of unhealthy  
477 commodities (e.g., alcohol) to disadvantaged populations [40,43,50,60,72,86,103,110,121–123]  
478 and efforts to make unhealthy commodities appealing to women [61,95,98]. Millar described  
479 increasing domestic income inequities because of large corporate profits which are distributed  
480 amongst the elite, who also lobby for reduced taxation [62]. Some private sectors (e.g., the for-  
481 profit prison industry, tobacco industry) were accused of placing undue burdens on certain  
482 groups (e.g., Black Americans, Indigenous populations) [1,50,107,124–126]. Corporations were  
483 reported to push for privatization, which was seen as widening inequities [62,127]. In some  
484 cases, initiatives ostensibly undertaken to improve equity (i.e., efforts to diversify cannabis  
485 industry employment) were seen as self-serving attempts to advance industry interests (e.g.,  
486 increase consumption) [27].

487 Some articles also described corporate influences on global inequities, including the ‘downward  
488 pressure’ on working conditions via corporations’ use of low-wage havens [40,41,113,114],  
489 exploitation of the weaker regulatory structures of LMICs, the extraction of wealth from LMICs  
490 to HICs [108,114], and the identification of LMICs as ‘emerging markets’ by unhealthy  
491 commodity producers (e.g., tobacco) to replace declines in consumption in HICs  
492 [36,40,43,72,128].

493

494 *Vulnerable Groups*

495 The literature described vulnerable groups such as children and pregnant persons being  
496 affected by products and associated marketing and educational techniques, as well as the  
497 political practices that enable these marketing techniques. Specifically, the included literature  
498 discussed food and beverage industry marketing directed towards children and involvement of  
499 the industry in schools and other child-centered programming (e.g., distribution of branded  
500 school supplies, development of nutrition educational programmes for children) [12,19,43,123].  
501 Pregnant persons and mothers were mostly discussed in the context of the BMS industry and  
502 relevant activities included marketing, industry sponsored educational resources, industry  
503 interactions with health care professionals, and donations of BMS during emergencies (i.e.,  
504 ‘crisis marketing’) [18,20,42,47,73,74,91,129]. Other vulnerable groups (e.g., the elderly or  
505 people with disabilities) were not frequently discussed.

506 *Local Communities*

507 The health outcomes of local communities are likely be most influenced by environmental and  
508 employment practices, especially those occurring in the supply chain, which are enabled by  
509 political practices. In the included literature, there was little discussion of specific activities that  
510 may influence these communities. One activity that was discussed was the dislocation of local  
511 communities [65,113] through, for example, the activities of the extractive industry [113]. This  
512 dislocation was reported to lead to social exclusion, poor access to infrastructure, and  
513 dependency on mining activities [113].



## 514 **Discussion**

515 In this article, we reported on the development of the cross-industry HEALTH-CORP typology,  
516 which describes 70 health-relevant corporate activities that are categorized across seven  
517 domains of corporate influence. We presented a graphical model that situates these domains in  
518 relation to their proximity to health outcomes and identified five population groups whose  
519 health is influenced by corporate activities.

520 These contributions draw from and directly supplement previous work [2–8]. Prior typologies of  
521 corporate activities tend to be more narrowly focused on either one particular industry or  
522 group of industries [3–5,8,130] and/or a specific type of corporate practice (e.g., political  
523 practices) [4,28,131]. To the best of our knowledge, the HEALTH-CORP typology is the most  
524 comprehensive typology of health-relevant corporate activities to-date. This novel typology  
525 covers a diverse range of corporate activities that were identified based on literature pertaining  
526 to 16 different industries. The seven domains we identified are well-aligned with practices  
527 proposed by others [2,6,8], indicating agreement on the key corporate practices that require  
528 our attention within efforts to mitigate the CDH. The 70 activities identified in the HEALTH-  
529 CORP typology add to this work by more comprehensively identifying the array of different  
530 activities through which these practices are manifested.

531 The identification of these activities will support future efforts to measure and monitor  
532 corporate activities, a key priority for the CDH field [3,4,8]. Ongoing work by our team includes  
533 using the HEALTH-CORP typology to guide the development of a food and beverage (F&B)  
534 industry-specific rubric that can be later transformed into an index to measure, monitor, and

535 score individual F&B companies on the diverse set of activities through which they exert  
536 influences on health. These efforts, alongside other relevant efforts [21,132,133], will be critical  
537 to our ability to track changes in corporate activities over time and to quantitatively assess the  
538 impact of corporate activities on specific health outcomes, another priority for the CDH field  
539 [24].

540 The HEALTH-CORP typology may also assist public health professionals, socially minded  
541 investors, and civil society in identifying harmful corporate activities that can be targeted for  
542 intervention. To achieve meaningful wide-scale change on the CDH, we suggest prioritizing  
543 interventions that address distal CDH activities such as the deep integration of corporations  
544 into political, academic, and professional structures. For example, implementing regulations  
545 that allow industry to fund research but blinding them to the investigators conducting the work  
546 [134] may be one measure that could be used to address the power that corporations hold over  
547 the production and dissemination of science. By effectively addressing the distal CDH, we may  
548 see corollary ‘run-off’ benefits to proximal domains such as products & services (e.g., improved  
549 product safety).

550 Our identification of five population groups whose health is affected by corporate activities may  
551 also assist with identifying interventions that can be used to protect the health of specific  
552 priority population groups. For example, introducing limits on the number of advertisements  
553 for unhealthy commodities on Spanish-language television may help prevent disproportionate  
554 marketing of unhealthy goods to Hispanic individuals living in the United States [121]. As  
555 suggested by Baum and colleagues [8], the priority placed on different population groups (e.g.,

556 local communities versus consumers) and the associated interventions are likely to differ based  
557 on the specific characteristics of the particular country or region of interest [8].

558 Finally, our review and synthesis of a substantial number of CDH articles allowed us to identify  
559 key research gaps in the CDH literature. First, the included literature reported extensively on  
560 political and preference and perception shaping practices, providing countless examples of how  
561 these practices have been manifested in different scenarios. However, some of the proximal  
562 domains (i.e., employment practices, environmental practices) were explored only superficially.  
563 This gap may be limiting our ability to understand the complex interactions between different  
564 types of corporate practices and may also limit our ability to determine which corporate  
565 activities are most health-harming and therefore should be prioritized for intervention.

566 Fortunately, there are robust fields of existing public health research (e.g., environmental  
567 health, occupational health) that we can draw on to better understand these activities.

568 Conducting collaborative work with occupational health, environmental health, and CDH  
569 scholars may lend fresh insights into these practices, their economic and political drivers, and  
570 the associated solutions.

571 Another gap is the limited investigation of the ways in which commercial entities influence the  
572 health of disadvantaged groups, vulnerable groups, and local communities. This may, in part,  
573 reflect the relative lack of CDH research on LMICs compared to HICs [reference to related  
574 manuscript]. Understanding the impact of corporate practices on these communities will be  
575 paramount to addressing domestic and global health inequities. Efforts to advance our  
576 understanding of these activities may be facilitated by the Corporate Health Impact Assessment

577 tool developed by Baum and colleagues [8], which can be used to conduct in-depth  
578 investigations of corporate practices within particular regions of interest.

579 Researchers can also expand our understanding of the role of specific actors by conducting  
580 community-based participatory research [135] with communities of interest to better  
581 understand the corporate activities that most affect them and determine how individuals in  
582 these communities weigh positive impacts of corporate involvement in their community (e.g.,  
583 employment) against negative impacts (e.g., water pollution).

584

#### 585 **Limitations**

586 We were able to review and synthesize 116 articles on the CDH across 16 industries to develop  
587 a fairly comprehensive typology of corporate activities that can influence health. We believe  
588 the HEALTH-CORP typology will be useful for advancing scholarship and practice on the CDH.  
589 However, the typology nor our associated model can completely explain the complex system  
590 through which commercial entities influence health. Moreover, other domains of corporate  
591 influence, such as corporate activities that exert influence over patterns of conflict and  
592 migration, may continue to emerge as CDH research advances.

593 We have focused on corporate actions in this article, rather than the systems and structures  
594 (e.g., neoliberalism) that drive these actions, or the influence of other actors (e.g., government)  
595 in co-creating these actions (e.g., privatization of services). The benefits of this approach are  
596 that actions are observable and observing them may lend insight into the associated structures.  
597 We included all activities that could be reasonably linked to human health; however, it was

598 beyond the scope of this review to assess the strength of evidence of the relationship of each  
599 activity to health.

600 Moreover, most of the included literature described corporate practices from a negative  
601 perspective that seemed to suggest that corporate actions are driven by profit-seeking and  
602 sometimes a willful neglect of the associated harms to health. In many cases (e.g., tobacco  
603 industry's attempts to sow doubt about the health harms of cigarettes), this perception may be  
604 accurate whereas in other cases (e.g., aggressive marketing) corporations may be driven by  
605 other factors inherent to our economic system (e.g., fiduciary duty to maximize profits and  
606 revenues). The proposed HEALTH-CORP model and typology (and CDH literature in general)  
607 may benefit from deeper consideration of the benefits some large companies provide to society  
608 that the current economic system facilitates (e.g., inexpensive goods manufactured efficiently  
609 at large-scales).

610 Our eligibility criteria did not include grey and non-English literature which may have improved  
611 the comprehensiveness of the HEALTH-CORP typology. Importantly, we also limited our review  
612 to articles that directly engaged with CDH terms, thereby excluding research that may describe  
613 health-relevant corporate practices without engaging with CDH concepts. We made this  
614 decision for feasibility purposes and because this strategy allowed us to identify key gaps in  
615 CDH literature, a contribution of this review.

616  
617  
618  
619  
620  
621

622 **Conclusions**

623 Scholarship on the CDH has documented the wide-ranging influence that corporate activities  
624 can have on population health. In this article, we make three contributions to the CDH  
625 literature. First, we developed the HEALTH-CORP typology, which describes 70 corporate  
626 activities that can influence population health across industries and categorizes these activities  
627 into seven domains of corporate influence. Second, we situate the domains based on their  
628 proximity to health outcomes and identify five population groups to consider when evaluating  
629 the health impact of corporate practices. Finally, we leverage our findings to reveal key gaps in  
630 CDH literature and recommend future avenues for CDH research. We believe these  
631 contributions will be useful for advancing public health research and practice related to the  
632 CDH.

633

634 **Table 2.** The Corporate Influences on Population Health (HEALTH-CORP) Typology, consisting of  
 635 seven domains and 70 activities.<sup>a</sup>  
 636

| <b>DISTAL DOMAINS OF CORPORATE INFLUENCE</b>                                                           |                                                                                         |
|--------------------------------------------------------------------------------------------------------|-----------------------------------------------------------------------------------------|
| <b>Political Practices</b>                                                                             |                                                                                         |
| <i>Activities related to securing a favourable policy environment:</i>                                 |                                                                                         |
|                                                                                                        | Political financing                                                                     |
|                                                                                                        | Bribery                                                                                 |
|                                                                                                        | Advocate for policies to limit corporate liability for health harms                     |
|                                                                                                        | Build relationships with public health institutions and/or other relevant groups        |
|                                                                                                        | Advocate for placement of corporate representatives on relevant associations and boards |
|                                                                                                        | Revolving doors                                                                         |
| <i>Activities related to stopping, delaying, or weakening proposed health and related policies:</i>    |                                                                                         |
|                                                                                                        | Legal action (or the threat thereof)                                                    |
|                                                                                                        | Advocate for self-regulation, co-regulation, or voluntary codes                         |
|                                                                                                        | Lobbying                                                                                |
|                                                                                                        | Pre-emption tactics                                                                     |
|                                                                                                        | Leverage trade and investment treaties                                                  |
|                                                                                                        | Amplify influence via front groups or industry alliances/coalitions                     |
|                                                                                                        | Argumentative strategies within policy submissions                                      |
|                                                                                                        | Misrepresent evidence or demand unrealistic evidence within policy submissions          |
|                                                                                                        | Exploit divisions in the public health community                                        |
|                                                                                                        | Intimidate opponents                                                                    |
|                                                                                                        | Shift or threaten to shift operations to regions with weaker labour regulations         |
| <i>Other political activities:</i>                                                                     |                                                                                         |
|                                                                                                        | Advocate for privatization of public services                                           |
| <b>Preference &amp; Perception Shaping Practices</b>                                                   |                                                                                         |
| <i>Activities related to promoting products:</i>                                                       |                                                                                         |
|                                                                                                        | Marketing                                                                               |
|                                                                                                        | Disproportionate marketing of harmful products to disadvantaged groups                  |
|                                                                                                        | Leverage pandemics/disasters, social movements to promote products                      |
|                                                                                                        | Sponsor sports teams                                                                    |
| <i>Activities related to shaping the public debate about products &amp; their health implications:</i> |                                                                                         |
|                                                                                                        | Involvement in public educational initiatives                                           |
|                                                                                                        | Conduct campaigns to influence the public's perception of health policies               |
|                                                                                                        | Craft inaccurate or skewed narratives about health & disease                            |

|                                                                                                                   |
|-------------------------------------------------------------------------------------------------------------------|
| Advance the ideas of individual responsibility and consumer choice                                                |
| Capture the media                                                                                                 |
| Use of experts to further industry interests                                                                      |
| <i>Activities related to shaping the professional debate about human health and nutrition:</i>                    |
| Fund professional associations                                                                                    |
| Involvement in the development of clinical standards                                                              |
| Involvement in educational initiatives for health care providers                                                  |
| <i>Activities related to shaping the production and interpretation of evidence:</i>                               |
| Fund external stakeholders to conduct and/or disseminate research                                                 |
| Suppress, amplify, or cherry-pick evidence or engage in agnogenesis                                               |
| Obscure conflicts of interest                                                                                     |
| Involvement in the development of scientific standards                                                            |
| Falsify data                                                                                                      |
| <b>Corporate Social Responsibility Practices</b>                                                                  |
| Develop or contribute to health promotion programs or health charities                                            |
| Develop or contribute to other social responsibility efforts relevant to health (e.g., diversity initiatives)     |
| Engage with existing social movements (e.g., women’s rights)                                                      |
| Product reformulation                                                                                             |
| <b>Economic Practices</b>                                                                                         |
| Tax practices                                                                                                     |
| Price fixing                                                                                                      |
| Contribute to economic growth                                                                                     |
| Contribute to inequitable distributions of wealth and power (e.g., through ownership and remuneration structures) |
| <b>PROXIMAL DOMAINS</b>                                                                                           |
| <b>Products &amp; Services</b>                                                                                    |
| <i>Activities related to the characteristics of products:</i>                                                     |
| Harmful or salutogenic properties                                                                                 |
| Addictive properties                                                                                              |
| <i>Activities related to the accessibility of products:</i>                                                       |
| Price and use of price promotions/discounts/coupons                                                               |
| Physical proximity and availability of products to consumers                                                      |
| <b>Employment Practices</b>                                                                                       |
| <i>Activities related to the characteristics of employment:</i>                                                   |
| Number of employment opportunities                                                                                |
| Adequacy of pay                                                                                                   |



|                                                                        |
|------------------------------------------------------------------------|
| Stability of employment terms                                          |
| <i>Activities related to the benefits received through employment:</i> |
| Presence and quality of medical benefits                               |
| Presence and quality of pension plans                                  |
| Presence, length, and paid or unpaid status of parental leave          |
| Presence and quality of employee wellness programs                     |
| <i>Activities related to the conditions of employment:</i>             |
| Quality of working conditions                                          |
| Anti-union activities                                                  |
| Support for breastfeeding in the workplace                             |
| Opportunities to work remotely and characteristics of remote work      |
| <i>Other employment-related activities:</i>                            |
| Use of child or forced labour                                          |
| <b>Environmental Practices</b>                                         |
| Use harmful chemicals and pesticides                                   |
| Pollute air                                                            |
| Pollute water                                                          |
| Produce waste                                                          |
| Extract resources (e.g., water)                                        |
| Contribute to deforestation                                            |
| Consume energy                                                         |
| Expropriate land for industry activities                               |
| Contribute to greenhouse gas emissions                                 |
| Contribute to biodiversity loss                                        |

<sup>a</sup>Some of these activities (e.g., parental leave benefits) are influenced by the actions of other actors (e.g., government) and not solely determined by the company.

638

639

640

641

642

643 **Declarations**

644 **Ethical approval and consent to participate:** Not applicable.

645 **Consent for publication:** Not applicable.

646 **Availability of data and materials:** The data for this study are published academic articles  
647 which are available from the respective publishers (see Additional File 1, Appendix 2 for the  
648 characteristics of included articles). In addition, we uploaded the following files to Open Science  
649 Framework (DOI 10.17605/OSF.IO/TG9S7) to support data availability: 1) a .csv file containing a  
650 list of the articles that underwent title and abstract screening in our study and the respective  
651 screening decisions that were assigned, and 2) .ris files containing the citations to the  
652 respective articles and the assigned screening decisions, which can be uploaded into a  
653 reference manager. Interested parties can contact the corresponding author for additional  
654 information.

655 **Competing interests:** The authors declare that they have no competing interests.

656 **Funding:** Raquel Burgess was supported by a Doctoral Foreign Study Award provided by the  
657 Canadian Institutes of Health Research at the time this research was conducted. Funding was  
658 provided by the Yale School of Public Health and the Yale Graduate Student Assembly to  
659 present this work at the American Public Health Association Annual Meeting in 2022.

660 **Authors' contributions:** R. Burgess conceptualized the study, completed the search and review  
661 process, synthesized the findings, and led the writing of the manuscript. K. Nyhan guided the  
662 review methodology and search strategy and contributed to the conceptualization of the study  
663 and revision of the manuscript. N. Freudenberg contributed to the intellectual content and  
664 revision of the manuscript and the development and revision of the typology and model. Y.

665 Ransome supervised the research and contributed to the conceptualization of the study and  
666 revision of the manuscript.

667 **Acknowledgements:** We would like to acknowledge the CDH experts who provided input on  
668 the HEALTH-CORP typology in the context of a related project. We would also like to  
669 acknowledge Dr. Trace Kershaw, Dr. Ijeoma Opara, and Dr. Rafael Perez-Escamilla for the useful  
670 feedback they provided related to this review.

671

672

673

674 **References**

- 675 1. Freudenberg N, Lee K, Buse K, Collin J, Crosbie E, Friel S, et al. Defining Priorities for Action  
676 and Research on the Commercial Determinants of Health: A Conceptual Review. *Am J Public*  
677 *Health* [Internet]. 2021;111:2202–11. Available from:  
678 <http://ovidsp.ovid.com/ovidweb.cgi?T=JS&PAGE=reference&D=emexa&NEWS=N&AN=6368636>  
679 34
- 680 2. Gilmore AB, Fabbri A, Baum F, Bertscher A, Bondy K, Chang H-J, et al. Defining and  
681 conceptualising the commercial determinants of health. *Lancet* [Internet]. 2023 [cited 2023 Apr  
682 20];401:1194–213. Available from: <http://www.ncbi.nlm.nih.gov/pubmed/36966782>
- 683 3. Bennett E, Topp S, Moodie A. National Public Health Surveillance of Corporations in Key  
684 Unhealthy Commodity Industries—a scoping review and framework synthesis. *Int J Health Policy*  
685 *Manag.* 2023;1–41.
- 686 4. Mialon M, Swinburn B, Sacks G. A proposed approach to systematically identify and monitor  
687 the corporate political activity of the food industry with respect to public health using publicly  
688 available information. *Obesity Reviews* [Internet]. 2015 [cited 2022 Feb 2];16:519–30. Available  
689 from: <https://onlinelibrary.wiley.com/doi/full/10.1111/obr.12289>
- 690 5. Ulucanlar S, Fooks GJ, Gilmore AB. The Policy Dystopia Model: An Interpretive Analysis of  
691 Tobacco Industry Political Activity. *PLoS Med* [Internet]. 2016 [cited 2021 Sep 16];13:e1002125.  
692 Available from: <http://medicine.plosjournals.org/perlserv/?request=index-html&issn=1549->  
693 1676
- 694 6. Madureira Lima J, Galea S. Corporate practices and health: A framework and mechanisms.  
695 *Global Health* [Internet]. 2018 [cited 2021 May 9];14:1–12. Available from:  
696 <https://www.scopus.com/inward/record.uri?eid=2-s2.0->  
697 85042139498&doi=10.1186%2Fs12992-018-0336-  
698 y&partnerID=40&md5=737e6e39d95d958e17845d3589cebe05
- 699 7. Ulucanlar S, Lauber K, Fabbri A, Hawkins B, Mialon M, Hancock L, et al. Corporate Political  
700 Activity: Taxonomies and Model of Corporate Influence on Public Policy. 2023 [cited 2023 Apr  
701 30]; Available from: <https://dx.doi.org/10.34172/ijhpm.2023.7292>
- 702 8. Baum FE, Sanders DM, Fisher M, Anaf J, Freudenberg N, Friel S, et al. Assessing the health  
703 impact of transnational corporations: Its importance and a framework. *Global Health* [Internet].  
704 2016 [cited 2021 Mar 9];12:1–7. Available from:  
705 <https://link.springer.com/articles/10.1186/s12992-016-0164-x>
- 706 9. Munn Z, Peters MDJ, Stern C, Tufanaru C, McArthur A, Aromataris E. Systematic review or  
707 scoping review? Guidance for authors when choosing between a systematic or scoping review  
708 approach. *BMC Med Res Methodol* [Internet]. 2018 [cited 2023 Apr 13];18:1–7. Available from:  
709 <https://bmcmedresmethodol.biomedcentral.com/articles/10.1186/s12874-018-0611-x>
- 710 10. Bearman M, Dawson P. Qualitative synthesis and systematic review in health professions  
711 education. *Med Educ* [Internet]. 2013 [cited 2023 Dec 7];47:252–60. Available from:  
712 <https://onlinelibrary.wiley.com/doi/full/10.1111/medu.12092>
- 713 11. Tricco AC, Lillie E, Zarin W, O’Brien KK, Colquhoun H, Levac D, et al. PRISMA extension for  
714 scoping reviews (PRISMA-ScR): Checklist and explanation. *Ann Intern Med* [Internet]. 2018  
715 [cited 2023 Mar 12];169:467–73. Available from:  
716 <https://www.acpjournals.org/doi/10.7326/M18-0850>

- 717 12. De Lacy-Vawdon C, Livingstone C. Defining the commercial determinants of health: A  
718 systematic review. *BMC Public Health* [Internet]. 2020 [cited 2021 May 15];20:1022. Available  
719 from: <https://rd.springer.com/article/10.1186/s12889-020-09126-1>  
720 13. Mendeley Desktop. Elsevier;
- 721 14. Ouzzani M, Hammady H, Fedorowicz Z, Elmagarmid A. Rayyan - a web and mobile app for  
722 systematic reviews. *Syst Rev*. 2016;5.
- 723 15. The EndNote Team. EndNote. Philadelphia, PA: Clarivate; 2013.
- 724 16. QSR International. NVivo 12 qualitative data analysis software. 2020.
- 725 17. Glaser BG. The Constant Comparative Method of Qualitative Analysis. *Soc Probl*.  
726 1965;12:436–45.
- 727 18. Baker P, Russ K, Kang M, Santos TM, Neves PAR, Smith J, et al. Globalization, first-foods  
728 systems transformations and corporate power: a synthesis of literature and data on the market  
729 and political practices of the transnational baby food industry. *Global Health* [Internet].  
730 2021;17:58. Available from: [https://www.scopus.com/inward/record.uri?eid=2-s2.0-  
731 85106677038&doi=10.1186%2Fs12992-021-00708-  
732 1&partnerID=40&md5=647acb4b9973cc4e440bcece840b947c](https://www.scopus.com/inward/record.uri?eid=2-s2.0-85106677038&doi=10.1186%2Fs12992-021-00708-1&partnerID=40&md5=647acb4b9973cc4e440bcece840b947c)
- 733 19. Mialon M, Gaitan Charry DA, Cediél G, Crosbie E, Baeza Scagliusi F, Pérez Tamayo EM. “the  
734 architecture of the state was transformed in favour of the interests of companies”: Corporate  
735 political activity of the food industry in Colombia. *Global Health* [Internet]. 2020;16:97.  
736 Available from: <http://www.globalizationandhealth.com/>
- 737 20. Tanrikulu H, Neri D, Robertson A, Mialon M. Corporate political activity of the baby food  
738 industry: The example of Nestlé in the United States of America. *Int Breastfeed J* [Internet].  
739 2020;15:22. Available from: [https://www.scopus.com/inward/record.uri?eid=2-s2.0-  
740 85083098748&doi=10.1186%2Fs13006-020-00268-  
741 x&partnerID=40&md5=a89f6a235b94c64a067293a460d9e3d6](https://www.scopus.com/inward/record.uri?eid=2-s2.0-85083098748&doi=10.1186%2Fs13006-020-00268-x&partnerID=40&md5=a89f6a235b94c64a067293a460d9e3d6)
- 742 21. Global Access to Nutrition Index 2021: Methodology. 2020.
- 743 22. Improving people’s health [Internet]. ShareAction. [cited 2023 Nov 4]. Available from:  
744 <https://shareaction.org/global-issues/better-health>
- 745 23. Peters M, Godfrey C, Mclnerney P, Munn Z, Tricco A, Khalil H. Chapter 11: Scoping Reviews.  
746 In: Aromataris E, Munn Z, editors. *JBIManual for Evidence Synthesis*. JBI; 2020.
- 747 24. Burgess R, Nyhan K, Dharia N, Freudenberg N, Ransome Y. Characteristics of commercial  
748 determinants of health research on corporate activities: A scoping review. Provisionally  
749 accepted at *PLOS One*. 2024;
- 750 25. Gollom M. What you need to know about the SNC-Lavalin affair. *CBC News*. 2019 Feb 13;
- 751 26. Holland MS. Liability for Vaccine Injury: the United States, the European Union, and the  
752 Developing World. *Emory Law J* [Internet]. 2017;67:415–62. Available from:  
753 [http://eds.a.ebscohost.com/eds/detail/detail?vid=0&sid=de62705b-3bfe-4ca8-86e0-  
754 5eed44ad3cb8%40sdc-v-  
755 sessmgr02&bdata=JnNpdGU9ZWRzLWxpdmU%3D#AN=129043427&db=aph](http://eds.a.ebscohost.com/eds/detail/detail?vid=0&sid=de62705b-3bfe-4ca8-86e0-5eed44ad3cb8%40sdc-v-sessmgr02&bdata=JnNpdGU9ZWRzLWxpdmU%3D#AN=129043427&db=aph)
- 756 27. Wakefield T, Glantz SA, Apollonio DE, T. W, S.A. G. Content Analysis of the Corporate Social  
757 Responsibility Practices of 9 Major Cannabis Companies in Canada and the US. *JAMA Netw*  
758 *Open* [Internet]. 2022;E2228088. Available from:  
759 <https://jamanetwork.com/journals/jamanetworkopen>

- 760 28. Knai C, Petticrew M, Capewell S, Cassidy R, Collin J, Cummins S, et al. The case for  
761 developing a cohesive systems approach to research across unhealthy commodity industries.  
762 *BMJ Glob Health* [Internet]. 2021;6:e003543. Available from: <https://gh.bmj.com/>  
763 29. Occupational Health [Internet]. International Labour Organization. [cited 2023 Feb 28].  
764 Available from: [https://www.ilo.org/safework/areasofwork/occupational-health/lang--](https://www.ilo.org/safework/areasofwork/occupational-health/lang--en/index.htm)  
765 [en/index.htm](https://www.ilo.org/safework/areasofwork/occupational-health/lang--en/index.htm)  
766 30. Sattler B. *Environmental Health. Policy Polit Nurs Pract.* 2003;4:4–5.  
767 31. Mialon M. An overview of the commercial determinants of health. *Global Health. BioMed*  
768 *Central Ltd*; 2020.  
769 32. Buse K, Tanaka S, Hawkes S. Healthy people and healthy profits? Elaborating a conceptual  
770 framework for governing the commercial determinants of non-communicable diseases and  
771 identifying options for reducing risk exposure. *Global Health. BioMed Central Ltd.*; 2017.  
772 33. Brown T. Legislative Capture: Critical Considerations in the Commercial Determinants of  
773 Health. *SSRN Electronic Journal* [Internet]. 2019; Available from:  
774 <https://www.ssrn.com/abstract=3687855>  
775 34. van Schalkwyk MCI, Petticrew M, Cassidy R, Adams P, McKee M, Reynolds J, et al. A public  
776 health approach to gambling regulation: countering powerful influences. *Lancet Public Health.*  
777 2021;6:e614–9.  
778 35. Wiist WH. The Foundations of Corporate Strategies Comment on “‘Part of the Solution’:  
779 Food Corporation Strategies for Regulatory Capture and Legitimacy”. *Int J Health Policy Manag*  
780 [Internet]. 2022; Available from:  
781 [http://ovidsp.ovid.com/ovidweb.cgi?T=JS&PAGE=reference&D=medp&NEWS=N&AN=3539748](http://ovidsp.ovid.com/ovidweb.cgi?T=JS&PAGE=reference&D=medp&NEWS=N&AN=35397485)  
782 [5](http://ovidsp.ovid.com/ovidweb.cgi?T=JS&PAGE=reference&D=medp&NEWS=N&AN=35397485)  
783 36. Chavez-Ugalde Y, Jago R, Toumpakari Z, Egan M, Cummins S, White M, et al. Conceptualizing  
784 the commercial determinants of dietary behaviors associated with obesity: A systematic review  
785 using principles from critical interpretative synthesis. *Obes Sci Pract* [Internet]. 2021;7:473–86.  
786 Available from: [https://www.scopus.com/inward/record.uri?eid=2-s2.0-](https://www.scopus.com/inward/record.uri?eid=2-s2.0-85103578531&doi=10.1002%2Fosp4.507&partnerID=40&md5=fbbb0335599e89a0add6892a7ec20c05)  
787 [85103578531&doi=10.1002%2Fosp4.507&partnerID=40&md5=fbbb0335599e89a0add6892a7e](https://www.scopus.com/inward/record.uri?eid=2-s2.0-85103578531&doi=10.1002%2Fosp4.507&partnerID=40&md5=fbbb0335599e89a0add6892a7ec20c05)  
788 [c20c05](https://www.scopus.com/inward/record.uri?eid=2-s2.0-85103578531&doi=10.1002%2Fosp4.507&partnerID=40&md5=fbbb0335599e89a0add6892a7ec20c05)  
789 37. Hoe C, Taber N, Champagne S, Bachani AM. Drink, but don’t drive? The alcohol industry’s  
790 involvement in global road safety. *Health Policy Plan* [Internet]. 2020;35:1328–38. Available  
791 from:  
792 [http://ovidsp.ovid.com/ovidweb.cgi?T=JS&PAGE=reference&D=emed22&NEWS=N&AN=63350](http://ovidsp.ovid.com/ovidweb.cgi?T=JS&PAGE=reference&D=emed22&NEWS=N&AN=633507007)  
793 [7007](http://ovidsp.ovid.com/ovidweb.cgi?T=JS&PAGE=reference&D=emed22&NEWS=N&AN=633507007)  
794 38. Wiist WH. Mechanisms Underlying Corporations as Determinants of Health. *Am J Public*  
795 *Health* [Internet]. 2019 [cited 2022 Jan 3];109:e1. Available from:  
796 [http://ovidsp.ovid.com/ovidweb.cgi?T=JS&PAGE=reference&D=emed20&NEWS=N&AN=62598](http://ovidsp.ovid.com/ovidweb.cgi?T=JS&PAGE=reference&D=emed20&NEWS=N&AN=625989148)  
797 [9148](http://ovidsp.ovid.com/ovidweb.cgi?T=JS&PAGE=reference&D=emed20&NEWS=N&AN=625989148)  
798 39. Eastmure E, Cummins S, Sparks L. Non-market strategy as a framework for exploring  
799 commercial involvement in health policy: A primer. *Soc Sci Med* [Internet]. 2020;262:113257.  
800 Available from: [https://www.scopus.com/inward/record.uri?eid=2-s2.0-](https://www.scopus.com/inward/record.uri?eid=2-s2.0-85089080870&doi=10.1016%2Fj.socscimed.2020.113257&partnerID=40&md5=d263d4fad0fb157d521ed1b9ba25fc53)  
801 [85089080870&doi=10.1016%2Fj.socscimed.2020.113257&partnerID=40&md5=d263d4fad0fb1](https://www.scopus.com/inward/record.uri?eid=2-s2.0-85089080870&doi=10.1016%2Fj.socscimed.2020.113257&partnerID=40&md5=d263d4fad0fb157d521ed1b9ba25fc53)  
802 [57d521ed1b9ba25fc53](https://www.scopus.com/inward/record.uri?eid=2-s2.0-85089080870&doi=10.1016%2Fj.socscimed.2020.113257&partnerID=40&md5=d263d4fad0fb157d521ed1b9ba25fc53)

- 803 40. Jamieson L, Gibson B, Thomson WM, L. J, B. G. Oral health inequalities and the corporate  
804 determinants of health: A commentary. *Int J Environ Res Public Health* [Internet]. 2020;17:1–6.  
805 Available from: <https://www.mdpi.com/1660-4601/17/18/6529/pdf>
- 806 41. McKee M, Stuckler D, M. M, McKee M, Stuckler D. Revisiting the corporate and commercial  
807 determinants of health. *Am J Public Health* [Internet]. 2018 [cited 2022 Jan 3];108:1167–70.  
808 Available from: [https://www.scopus.com/inward/record.uri?eid=2-s2.0-  
809 85051184487&doi=10.2105%2FAJPH.2018.304510&partnerID=40&md5=407ebdbc80f5eeb253  
810 021388f017af12](https://www.scopus.com/inward/record.uri?eid=2-s2.0-85051184487&doi=10.2105%2FAJPH.2018.304510&partnerID=40&md5=407ebdbc80f5eeb253021388f017af12)
- 811 42. Cossez E, Baker P, Mialon M. ‘The second mother’: How the baby food industry captures  
812 science, health professions and civil society in France. *Matern Child Nutr* [Internet].  
813 2022;18:e13301. Available from: [http://onlinelibrary.wiley.com/journal/10.1111/\(ISSN\)1740-  
814 8709](http://onlinelibrary.wiley.com/journal/10.1111/(ISSN)1740-8709)
- 815 43. Freudenberg N. Responding to Food Industry Initiatives to Be “Part of the Solution”  
816 Comment on “‘Part of the Solution’: Food Corporation Strategies for Regulatory Capture and  
817 Legitimacy.” *Int J Health Policy Manag* [Internet]. 2022;11:2740–3. Available from:  
818 [http://ovidsp.ovid.com/ovidweb.cgi?T=JS&PAGE=reference&D=emexb&NEWS=N&AN=638690  
819 701](http://ovidsp.ovid.com/ovidweb.cgi?T=JS&PAGE=reference&D=emexb&NEWS=N&AN=638690701)
- 820 44. Adams PJJ, Rychert M, Wilkins C. Policy influence and the legalized cannabis industry:  
821 learnings from other addictive consumption industries. *Addiction* [Internet]. 2021;116:2939–46.  
822 Available from: [https://www.scopus.com/inward/record.uri?eid=2-s2.0-  
823 85103170796&doi=10.1111%2Fadd.15483&partnerID=40&md5=b9e5eb3fa6837fad7c7b1da8f8  
824 50f427](https://www.scopus.com/inward/record.uri?eid=2-s2.0-85103170796&doi=10.1111%2Fadd.15483&partnerID=40&md5=b9e5eb3fa6837fad7c7b1da8f850f427)
- 825 45. Kroker-Lobos MF, Morales LA, Ramirez-Zea M, Vandevijvere S, Champagne B, Mialon M, et  
826 al. Two countries, similar practices: The political practices of the food industry influencing the  
827 adoption of key public health nutrition policies in Guatemala and Panama. *Public Health Nutr*  
828 [Internet]. 2022;1–33. Available from:  
829 [http://ovidsp.ovid.com/ovidweb.cgi?T=JS&PAGE=reference&D=emexb&NEWS=N&AN=638801  
830 438](http://ovidsp.ovid.com/ovidweb.cgi?T=JS&PAGE=reference&D=emexb&NEWS=N&AN=638801438)
- 831 46. Maani Hessari N, Ruskin G, McKee M, Stuckler D. Public Meets Private: Conversations  
832 Between Coca-Cola and the CDC. *Milbank Quarterly* [Internet]. 2019;97:74–90. Available from:  
833 [http://onlinelibrary.wiley.com/journal/10.1111/\(ISSN\)1468-0009](http://onlinelibrary.wiley.com/journal/10.1111/(ISSN)1468-0009)
- 834 47. Hastings G, Angus K, Eadie D, Hunt K. Selling second best: How infant formula marketing  
835 works. *Global Health* [Internet]. 2020;16:77. Available from:  
836 [http://ovidsp.ovid.com/ovidweb.cgi?T=JS&PAGE=reference&D=emed21&NEWS=N&AN=63272  
837 7368](http://ovidsp.ovid.com/ovidweb.cgi?T=JS&PAGE=reference&D=emed21&NEWS=N&AN=632727368)
- 838 48. Hird TR, Gallagher AWA, Evans-Reeves K, Zatonski M, Dance S, Diethelm PA, et al.  
839 Understanding the long-term policy influence strategies of the tobacco industry: two  
840 contemporary case studies. *Tob Control* [Internet]. 2022;31:297–307. Available from:  
841 [https://www.scopus.com/inward/record.uri?eid=2-s2.0-  
842 85125690415&doi=10.1136%2Ftobaccocontrol-2021-  
843 057030&partnerID=40&md5=39c263575d3e9fdd09f112b4e324b535](https://www.scopus.com/inward/record.uri?eid=2-s2.0-85125690415&doi=10.1136%2Ftobaccocontrol-2021-057030&partnerID=40&md5=39c263575d3e9fdd09f112b4e324b535)
- 844 49. Mialon M, Charry DAG, Cediel G, Crosbie E, Scagliusi FB, Tamayo EMP. “I had never seen so  
845 many lobbyists”: Food industry political practices during the development of a new nutrition  
846 front-of-pack labelling system in Colombia. *Public Health Nutr* [Internet]. 2021;24:2737–45.

- 847 Available from:  
848 <http://ovidsp.ovid.com/ovidweb.cgi?T=JS&PAGE=reference&D=emed22&NEWS=N&AN=63266>  
849 8742
- 850 50. Maani N, Van Schalkwyk MC, Petticrew M, Galea S. The Commercial Determinants of Three  
851 Contemporary National Crises: How Corporate Practices Intersect With the COVID-19  
852 Pandemic, Economic Downturn, and Racial Inequity. *Milbank Quarterly* [Internet]. 2021 [cited  
853 2022 Feb 2];99:503–18. Available from: [https://www.scopus.com/inward/record.uri?eid=2-](https://www.scopus.com/inward/record.uri?eid=2-s2.0-85103384553&doi=10.1111%2F1468-0009.12510&partnerID=40&md5=0cb90796e1918e0b9a4cc9becfd5fa48)  
854 [s2.0-85103384553&doi=10.1111%2F1468-](https://www.scopus.com/inward/record.uri?eid=2-s2.0-85103384553&doi=10.1111%2F1468-0009.12510&partnerID=40&md5=0cb90796e1918e0b9a4cc9becfd5fa48)  
855 [0009.12510&partnerID=40&md5=0cb90796e1918e0b9a4cc9becfd5fa48](https://www.scopus.com/inward/record.uri?eid=2-s2.0-85103384553&doi=10.1111%2F1468-0009.12510&partnerID=40&md5=0cb90796e1918e0b9a4cc9becfd5fa48)
- 856 51. Mialon M, Crosbie E, Sacks G, M. M, E. C, Sacks G. AO - Mialon MO [https://orcid.org/0000-](https://orcid.org/0000-0002-9883-6441)  
857 [0002-9883-6441](https://orcid.org/0000-0002-9883-6441). Mapping of food industry strategies to influence public health policy, research  
858 and practice in South Africa. *Int J Public Health* [Internet]. 2020;65:1027–36. Available from:  
859 <http://ovidsp.ovid.com/ovidweb.cgi?T=JS&PAGE=reference&D=emed21&NEWS=N&AN=63248>  
860 8017
- 861 52. Lauber K, Hunt D, Gilmore AB, Rutter H. Corporate political activity in the context of  
862 unhealthy food advertising restrictions across Transport for London: A qualitative case study.  
863 *PLoS Med.* 2021;18.
- 864 53. Hunt D. How food companies use social media to influence policy debates: A framework of  
865 Australian ultra-processed food industry Twitter data. *Public Health Nutr.* 2021;24:3124–35.
- 866 54. Lauber K, Ralston R, Mialon M, Carriedo A, Gilmore AB. Non-communicable disease  
867 governance in the era of the sustainable development goals: A qualitative analysis of food  
868 industry framing in WHO consultations. *Global Health.* 2020;16.
- 869 55. Lacy-Nichols J, Marten R. Power and the commercial determinants of health: Ideas for a  
870 research agenda. *BMJ Glob Health.* BMJ Publishing Group; 2021.
- 871 56. Knai C, Petticrew M, Mays N, Capewell S, Cassidy R, Cummins S, et al. Systems Thinking as a  
872 Framework for Analyzing Commercial Determinants of Health. *Milbank Quarterly.* 2018;96:472–  
873 98.
- 874 57. Campbell N, Browne S, Claudy M, Mialon M, Hercberg S, Goiana-da-Silva F, et al. The Gift of  
875 Data: Industry-Led Food Reformulation and the Obesity Crisis in Europe. *Journal of Public Policy*  
876 *and Marketing.* 2021;40:389–402.
- 877 58. Lacy-Nichols J, Scrinis G, Carey R. The politics of voluntary self-regulation: Insights from the  
878 development and promotion of the Australian Beverages Council’s Commitment. *Public Health*  
879 *Nutr.* 2020;23:564–75.
- 880 59. Backholer K, Baum F, Finlay SM, Friel S, Giles-Corti B, Jones A, et al. Australia in 2030: what  
881 is our path to health for all? *Medical Journal of Australia.* 2021;214:S5–40.
- 882 60. S.E. H, P. J, R.T. N, Collin J. AO - Hill Rima T.; ORCID: [https://orcid.org/0000-0001-8800-](https://orcid.org/0000-0001-8800-5591)  
883 [5591](https://orcid.org/0000-0001-8800-5591) SE; O <https://orcid.org/0000-0003-3555-433X> AO-N, Hill SE, Johns P, et al. From silos to  
884 policy coherence: tobacco control, unhealthy commodity industries and the commercial  
885 determinants of health. *Tob Control* [Internet]. 2022;31:322–7. Available from:  
886 [https://www.scopus.com/inward/record.uri?eid=2-s2.0-](https://www.scopus.com/inward/record.uri?eid=2-s2.0-85125691950&doi=10.1136%2Ftobaccocontrol-2021-057136&partnerID=40&md5=eaf9dd75ae1ce88ae3e426ec832340ba)  
887 [85125691950&doi=10.1136%2Ftobaccocontrol-2021-](https://www.scopus.com/inward/record.uri?eid=2-s2.0-85125691950&doi=10.1136%2Ftobaccocontrol-2021-057136&partnerID=40&md5=eaf9dd75ae1ce88ae3e426ec832340ba)  
888 [057136&partnerID=40&md5=eaf9dd75ae1ce88ae3e426ec832340ba](https://www.scopus.com/inward/record.uri?eid=2-s2.0-85125691950&doi=10.1136%2Ftobaccocontrol-2021-057136&partnerID=40&md5=eaf9dd75ae1ce88ae3e426ec832340ba)



- 889 61. Hill SE, Friel S. 'As long as it comes off as a cigarette ad, not a civil rights message': Gender,  
890 inequality and the commercial determinants of health. *Int J Environ Res Public Health*  
891 [Internet]. 2020;17:1–19. Available from: <https://www.mdpi.com/1660-4601/17/21/7902/pdf>  
892 62. Millar JS. The corporate determinants of health: How big business affects our health, and  
893 the need for government action! *Canadian Journal of Public Health* [Internet]. 2013 [cited 2021  
894 May 11];104:e327–9. Available from:  
895 <http://journal.cpha.ca/index.php/cjph/article/download/3849/2840>  
896 63. Van Schalkwyk MC, Maani N, Cohen J, Mckee M, Petticrew M. Our Postpandemic World:  
897 What Will It Take to Build a Better Future for People and Planet? *Milbank Quarterly* [Internet].  
898 2021;99:467–502. Available from: [https://www.scopus.com/inward/record.uri?eid=2-s2.0-  
899 85103403620&doi=10.1111%2F1468-  
900 0009.12508&partnerID=40&md5=1d3dd9e1dc9d712ab17e510f3e23d636](https://www.scopus.com/inward/record.uri?eid=2-s2.0-85103403620&doi=10.1111%2F1468-0009.12508&partnerID=40&md5=1d3dd9e1dc9d712ab17e510f3e23d636)  
901 64. Zenone M, Kenworthy N, Maani N. The Social Media Industry as a Commercial Determinant  
902 of Health. *Int J Health Policy Manag* [Internet]. 2023;12. Available from:  
903 [http://ovidsp.ovid.com/ovidweb.cgi?T=JS&PAGE=reference&D=medp&NEWS=N&AN=3549026  
904 2](http://ovidsp.ovid.com/ovidweb.cgi?T=JS&PAGE=reference&D=medp&NEWS=N&AN=35490262)  
905 65. Wood B, Baker P, Sacks G. Conceptualising the Commercial Determinants of Health Using a  
906 Power Lens: A Review and Synthesis of Existing Frameworks. *Int J Health Policy Manag*  
907 [Internet]. 2022;11:1251–61. Available from:  
908 [http://ovidsp.ovid.com/ovidweb.cgi?T=JS&PAGE=reference&D=emexb&NEWS=N&AN=634395  
909 313](http://ovidsp.ovid.com/ovidweb.cgi?T=JS&PAGE=reference&D=emexb&NEWS=N&AN=634395313)  
910 66. Brown T. Public Health versus Alcohol Industry Compliance Laws: A Case of Industry  
911 Capture? *J Law Med* [Internet]. 2020;27:1047–73. Available from:  
912 [https://www.scopus.com/inward/record.uri?eid=2-s2.0-  
913 85090260756&partnerID=40&md5=2b8d09a793fa746a935cd0f17d30a7c3](https://www.scopus.com/inward/record.uri?eid=2-s2.0-85090260756&partnerID=40&md5=2b8d09a793fa746a935cd0f17d30a7c3)  
914 67. Abdool Karim S, Kruger P, Hofman K. Industry strategies in the parliamentary process of  
915 adopting a sugar-sweetened beverage tax in South Africa: a systematic mapping. *Global Health*  
916 [Internet]. 2020;16:116. Available from: [http://www.globalizationandhealth.com/  
917](http://www.globalizationandhealth.com/)  
918 68. Mialon M, Mialon J, Calixto Andrade G, Jean-Claude M. 'We must have a sufficient level of  
919 profitability': food industry submissions to the French parliamentary inquiry on industrial food.  
919 *Crit Public Health* [Internet]. 2020;30:457–67. Available from:  
920 <https://www.tandf.co.uk/journals/titles/09581596.asp>  
921 69. Mialon M, Khandpur N, Laís MA, Martins APB. Arguments used by trade associations during  
922 the early development of a new front-of-pack nutrition labelling system in Brazil. *Public Health*  
923 *Nutr.* 2020;  
924 70. Barlow P, Thow AM, P. B. Neoliberal discourse, actor power, and the politics of nutrition  
925 policy: A qualitative analysis of informal challenges to nutrition labelling regulations at the  
926 World Trade Organization, 2007-2019. *Soc Sci Med* [Internet]. 2021;273:113761. Available  
927 from: <https://www.elsevier.com/locate/socscimed>  
928 71. Clare K, Maani N, Milner J. Meat, money and messaging: How the environmental and health  
929 harms of red and processed meat consumption are framed by the meat industry. *Food Policy*  
930 [Internet]. 2022;109. Available from: [https://www.scopus.com/inward/record.uri?eid=2-s2.0-  
931 85127324192&doi=10.1016%2Fj.foodpol.2022.102234&partnerID=40&md5=05065edaeda5230  
932 67beeab20336ba5af](https://www.scopus.com/inward/record.uri?eid=2-s2.0-85127324192&doi=10.1016%2Fj.foodpol.2022.102234&partnerID=40&md5=05065edaeda523067beeab20336ba5af)

- 933 72. Hoe C, Weiger C, Minosa MKR, Alonso F, Koon AD, Cohen JE. Strategies to expand corporate  
934 autonomy by the tobacco, alcohol and sugar-sweetened beverage industry: a scoping review of  
935 reviews. *Global Health* [Internet]. 2022;18:17. Available from:  
936 <http://www.globalizationandhealth.com/>
- 937 73. Russ K, Baker P, Byrd M, Kang M, Siregar RN, Zahid H, et al. What You Don't Know About the  
938 Codex Can Hurt You: How Trade Policy Trumps Global Health Governance in Infant and Young  
939 Child Nutrition. *Int J Health Policy Manag* [Internet]. 2021;10:983–97. Available from:  
940 <http://ovidsp.ovid.com/ovidweb.cgi?T=JS&PAGE=reference&D=medp&NEWS=N&AN=3463486>  
941 8
- 942 74. Baker P, Zambrano P, Mathisen R, Singh-Vergeire MRR, Escobar AEE, Mialon M, et al.  
943 Breastfeeding, first-food systems and corporate power: a case study on the market and political  
944 practices of the transnational baby food industry and public health resistance in the Philippines.  
945 *Global Health* [Internet]. 2021;17. Available from:  
946 [https://www.scopus.com/inward/record.uri?eid=2-s2.0-](https://www.scopus.com/inward/record.uri?eid=2-s2.0-85118243807&doi=10.1186%2Fs12992-021-00774-5&partnerID=40&md5=1844e47474ba77e1e2b1c38668ddc4ff)  
947 [85118243807&doi=10.1186%2Fs12992-021-00774-](https://www.scopus.com/inward/record.uri?eid=2-s2.0-85118243807&doi=10.1186%2Fs12992-021-00774-5&partnerID=40&md5=1844e47474ba77e1e2b1c38668ddc4ff)  
948 [5&partnerID=40&md5=1844e47474ba77e1e2b1c38668ddc4ff](https://www.scopus.com/inward/record.uri?eid=2-s2.0-85118243807&doi=10.1186%2Fs12992-021-00774-5&partnerID=40&md5=1844e47474ba77e1e2b1c38668ddc4ff)
- 949 75. Brisbois B, Feagan M, Stime B, Paz IK, Berbés-Blázquez M, Gaibor J, et al. Mining, Colonial  
950 Legacies, and Neoliberalism: A Political Ecology of Health Knowledge: Minería, legados  
951 coloniales y neoliberalismo: una ecología política del conocimiento en salud. *New Solutions*  
952 [Internet]. 2021;31:48–64. Available from: [https://www.scopus.com/inward/record.uri?eid=2-](https://www.scopus.com/inward/record.uri?eid=2-s2.0-85102708084&doi=10.1177%2f10482911211001051&partnerID=40&md5=3342652af1e49caa84d5a3a9a88c62e5)  
953 [s2.0-](https://www.scopus.com/inward/record.uri?eid=2-s2.0-85102708084&doi=10.1177%2f10482911211001051&partnerID=40&md5=3342652af1e49caa84d5a3a9a88c62e5)  
954 [85102708084&doi=10.1177%2f10482911211001051&partnerID=40&md5=3342652af1e49caa8](https://www.scopus.com/inward/record.uri?eid=2-s2.0-85102708084&doi=10.1177%2f10482911211001051&partnerID=40&md5=3342652af1e49caa84d5a3a9a88c62e5)  
955 [4d5a3a9a88c62e5](https://www.scopus.com/inward/record.uri?eid=2-s2.0-85102708084&doi=10.1177%2f10482911211001051&partnerID=40&md5=3342652af1e49caa84d5a3a9a88c62e5)
- 956 76. Mialon M, Crosbie E, Sacks G. Mapping of food industry strategies to influence public health  
957 policy, research and practice in South Africa. *Int J Public Health*. 2020;65:1027–36.
- 958 77. McHardy J. The WHO FCTC's lessons for addressing the commercial determinants of health.  
959 *Health Promot Int*. 2021;36:i39–52.
- 960 78. Fooks GJ, Godziewski C. The World Health Organization, Corporate Power, and the  
961 Prevention and Management of Conflicts of Interest in Nutrition Policy Comment on “Towards  
962 Preventing and Managing Conflict of Interest in Nutrition Policy? An Analysis of Submissions to  
963 a Consultati. *Int J Health Policy Manag* [Internet]. 2022;11:228–32. Available from:  
964 [https://www.scopus.com/inward/record.uri?eid=2-s2.0-](https://www.scopus.com/inward/record.uri?eid=2-s2.0-85125551514&doi=10.34172%2Fijhpm.2020.156&partnerID=40&md5=3a84e743cc8ba9c4de5b74a23cea8dbc)  
965 [85125551514&doi=10.34172%2Fijhpm.2020.156&partnerID=40&md5=3a84e743cc8ba9c4de5b](https://www.scopus.com/inward/record.uri?eid=2-s2.0-85125551514&doi=10.34172%2Fijhpm.2020.156&partnerID=40&md5=3a84e743cc8ba9c4de5b74a23cea8dbc)  
966 [74a23cea8dbc](https://www.scopus.com/inward/record.uri?eid=2-s2.0-85125551514&doi=10.34172%2Fijhpm.2020.156&partnerID=40&md5=3a84e743cc8ba9c4de5b74a23cea8dbc)
- 967 79. Kadandale S, Marten R, Smith R, S. K, R. M. The palm oil industry and noncommunicable  
968 diseases. *Bull World Health Organ* [Internet]. 2019;97:118–28. Available from:  
969 <https://www.who.int/bulletin/volumes/97/2/18-220434.pdf?ua=1>
- 970 80. Mialon M, Corvalan C, Cediel G, Scagliusi FBBFB, Reyes M. Food industry political practices  
971 in Chile: “the economy has always been the main concern.” *Global Health* [Internet]. 2020;16.  
972 Available from: [https://www.scopus.com/inward/record.uri?eid=2-s2.0-](https://www.scopus.com/inward/record.uri?eid=2-s2.0-85094114467&doi=10.1186%2Fs12992-020-00638-4&partnerID=40&md5=5f40dc19b429497220ed4eb238798d2a)  
973 [85094114467&doi=10.1186%2Fs12992-020-00638-](https://www.scopus.com/inward/record.uri?eid=2-s2.0-85094114467&doi=10.1186%2Fs12992-020-00638-4&partnerID=40&md5=5f40dc19b429497220ed4eb238798d2a)  
974 [4&partnerID=40&md5=5f40dc19b429497220ed4eb238798d2a](https://www.scopus.com/inward/record.uri?eid=2-s2.0-85094114467&doi=10.1186%2Fs12992-020-00638-4&partnerID=40&md5=5f40dc19b429497220ed4eb238798d2a)
- 975 81. Mialon M, Ho M, Carriedo A, Ruskin G, Crosbie E. Beyond nutrition and physical activity:  
976 food industry shaping of the very principles of scientific integrity. *Global Health*. 2021;17.

- 977 82. Madureira Lima J, Galea S. The Corporate Permeation Index – A tool to study the  
978 macrosocial determinants of Non-Communicable Disease. *SSM Popul Health*. 2019;7.  
979 83. Steele S, Sarcevic L, Ruskin G, Stuckler D. Confronting potential food industry ‘front groups’:  
980 case study of the international food information Council’s nutrition communications using the  
981 UCSF food industry documents archive. *Global Health [Internet]*. 2022;18. Available from:  
982 [https://www.scopus.com/inward/record.uri?eid=2-s2.0-](https://www.scopus.com/inward/record.uri?eid=2-s2.0-85124620522&doi=10.1186%2Fs12992-022-00806-8&partnerID=40&md5=236e555adb516f8c68e688a1099a19bd)  
983 [85124620522&doi=10.1186%2Fs12992-022-00806-](https://www.scopus.com/inward/record.uri?eid=2-s2.0-85124620522&doi=10.1186%2Fs12992-022-00806-8&partnerID=40&md5=236e555adb516f8c68e688a1099a19bd)  
984 [8&partnerID=40&md5=236e555adb516f8c68e688a1099a19bd](https://www.scopus.com/inward/record.uri?eid=2-s2.0-85124620522&doi=10.1186%2Fs12992-022-00806-8&partnerID=40&md5=236e555adb516f8c68e688a1099a19bd)  
985 84. Ramsbottom A, van Schalkwyk MCI, Carters-White L, Benylles Y, Petticrew M. Food as harm  
986 reduction during a drinking session: reducing the harm or normalising harmful use of alcohol? A  
987 qualitative comparative analysis of alcohol industry and non-alcohol industry-funded guidance.  
988 *Harm Reduct J [Internet]*. 2022;19:66. Available from:  
989 <http://www.harmreductionjournal.com/home/>  
990 85. Watts C, Burton S, Freeman B, C. W, S. B, Watts C, et al. ‘The last line of marketing’: Covert  
991 tobacco marketing tactics as revealed by former tobacco industry employees. *Glob Public*  
992 *Health [Internet]*. 2021;16:1000–13. Available from:  
993 <http://www.tandf.co.uk/journals/titles/17441692.asp>  
994 86. Mialon M. An overview of the commercial determinants of health. *Global Health [Internet]*.  
995 2020 [cited 2021 May 15];16:74. Available from: </pmc/articles/PMC7433173/>  
996 87. Backholer K, Baum F, Finlay SM, Friel S, Giles-Corti B, Jones A, et al. Australia in 2030: what  
997 is our path to health for all? *Medical Journal of Australia [Internet]*. 2021;214:S5–40. Available  
998 from: [https://www.scopus.com/inward/record.uri?eid=2-s2.0-](https://www.scopus.com/inward/record.uri?eid=2-s2.0-85105030886&doi=10.5694%2Fmja2.51020&partnerID=40&md5=b0e8f243e5557cdab73f9165d726c401)  
999 [85105030886&doi=10.5694%2Fmja2.51020&partnerID=40&md5=b0e8f243e5557cdab73f9165](https://www.scopus.com/inward/record.uri?eid=2-s2.0-85105030886&doi=10.5694%2Fmja2.51020&partnerID=40&md5=b0e8f243e5557cdab73f9165d726c401)  
1000 [d726c401](https://www.scopus.com/inward/record.uri?eid=2-s2.0-85105030886&doi=10.5694%2Fmja2.51020&partnerID=40&md5=b0e8f243e5557cdab73f9165d726c401)  
1001 88. Kasture A, Vandevijvere S, Robinson E, Sacks G, Swinburn B, A. K, et al. Benchmarking the  
1002 commitments related to population nutrition and obesity prevention of major food companies  
1003 in New Zealand. *Int J Public Health [Internet]*. 2019;64:1147–57. Available from:  
1004 [http://ovidsp.ovid.com/ovidweb.cgi?T=JS&PAGE=reference&D=emed20&NEWS=N&AN=62846](http://ovidsp.ovid.com/ovidweb.cgi?T=JS&PAGE=reference&D=emed20&NEWS=N&AN=628462909)  
1005 [2909](http://ovidsp.ovid.com/ovidweb.cgi?T=JS&PAGE=reference&D=emed20&NEWS=N&AN=628462909)  
1006 89. Sacks G, Robinson E, Cameron AJ, Vanderlee L, Vandevijvere S, Swinburn B. Benchmarking  
1007 the nutrition-related policies and commitments of major food companies in Australia, 2018. *Int*  
1008 *J Environ Res Public Health [Internet]*. 2020;17:1–23. Available from:  
1009 <https://www.mdpi.com/1660-4601/17/17/6118/pdf>  
1010 90. Stubbs T. Commercial determinants of youth smoking in ASEAN countries: A narrative  
1011 review of research investigating the influence of tobacco advertising, promotion, and  
1012 sponsorship. *Tob Induc Dis [Internet]*. 2021;19:1–14. Available from:  
1013 [http://www.tobaccoinduceddiseases.org/Commercial-determinants-of-youth-smoking-in-](http://www.tobaccoinduceddiseases.org/Commercial-determinants-of-youth-smoking-in-ASEAN-countries-A-narrative-review-of,139124,0,2.html)  
1014 [ASEAN-countries-A-narrative-review-of,139124,0,2.html](http://www.tobaccoinduceddiseases.org/Commercial-determinants-of-youth-smoking-in-ASEAN-countries-A-narrative-review-of,139124,0,2.html)  
1015 91. Baker P, Santos T, Neves PA, Machado P, Smith J, Piwoz E, et al. First-food systems  
1016 transformations and the ultra-processing of infant and young child diets: The determinants,  
1017 dynamics and consequences of the global rise in commercial milk formula consumption. *Matern*  
1018 *Child Nutr [Internet]*. 2021;17:e13097. Available from:  
1019 [http://onlinelibrary.wiley.com/journal/10.1111/\(ISSN\)1740-8709](http://onlinelibrary.wiley.com/journal/10.1111/(ISSN)1740-8709)

- 1020 92. Gillespie D, Hatchard J, Squires H, Gilmore A, Brennan A. Conceptualising changes to  
1021 tobacco and alcohol policy as affecting a single interlinked system. *BMC Public Health*  
1022 [Internet]. 2021;21:17. Available from: [https://www.scopus.com/inward/record.uri?eid=2-s2.0-](https://www.scopus.com/inward/record.uri?eid=2-s2.0-85098644699&doi=10.1186%2Fs12889-020-10000-3&partnerID=40&md5=e5046721715e4d0dfd126d66c88329f6)  
1023 [85098644699&doi=10.1186%2Fs12889-020-10000-](https://www.scopus.com/inward/record.uri?eid=2-s2.0-85098644699&doi=10.1186%2Fs12889-020-10000-3&partnerID=40&md5=e5046721715e4d0dfd126d66c88329f6)  
1024 [3&partnerID=40&md5=e5046721715e4d0dfd126d66c88329f6](https://www.scopus.com/inward/record.uri?eid=2-s2.0-85098644699&doi=10.1186%2Fs12889-020-10000-3&partnerID=40&md5=e5046721715e4d0dfd126d66c88329f6)
- 1025 93. Wood B, Williams O, Nagarajan V, Sacks G. Market strategies used by processed food  
1026 manufacturers to increase and consolidate their power: a systematic review and document  
1027 analysis. *Global Health* [Internet]. 2021;17:17. Available from:  
1028 <http://www.globalizationandhealth.com/>
- 1029 94. Peres MA, Macpherson LMDD, Weyant RJ, Daly B, Venturelli R, Mathur MR, et al. Oral  
1030 diseases: a global public health challenge. *The Lancet* [Internet]. 2019;394:249–60. Available  
1031 from: <http://www.journals.elsevier.com/the-lancet/>
- 1032 95. Hessari NM, Bertscher A, Critchlow N, Fitzgerald N, Knai C, Stead M, et al. Recruiting the  
1033 “heavy-using loyalists of tomorrow”: An analysis of the aims, effects and mechanisms of alcohol  
1034 advertising, based on advertising industry evaluations. *Int J Environ Res Public Health* [Internet].  
1035 2019;16:1–17. Available from: [https://www.scopus.com/inward/record.uri?eid=2-s2.0-](https://www.scopus.com/inward/record.uri?eid=2-s2.0-85074139312&doi=10.3390%2Fijerph16214092&partnerID=40&md5=71513da90629d98e92e1c0eeae4cbb3f)  
1036 [85074139312&doi=10.3390%2Fijerph16214092&partnerID=40&md5=71513da90629d98e92e1](https://www.scopus.com/inward/record.uri?eid=2-s2.0-85074139312&doi=10.3390%2Fijerph16214092&partnerID=40&md5=71513da90629d98e92e1c0eeae4cbb3f)  
1037 [c0eeae4cbb3f](https://www.scopus.com/inward/record.uri?eid=2-s2.0-85074139312&doi=10.3390%2Fijerph16214092&partnerID=40&md5=71513da90629d98e92e1c0eeae4cbb3f)
- 1038 96. Kickbusch I, Allen L, Franz C. The commercial determinants of health. *Lancet Glob Health*  
1039 [Internet]. 2016 [cited 2021 May 9];4:e895–6. Available from:  
1040 <http://www.who.int/dg/speeches/2013/>
- 1041 97. Gerritsen S, Sing F, Lin K, Martino F, Backholer K, Culpin A, et al. The Timing, Nature and  
1042 Extent of Social Media Marketing by Unhealthy Food and Drinks Brands During the COVID-19  
1043 Pandemic in New Zealand. *Front Nutr* [Internet]. 2021;8. Available from:  
1044 [https://www.scopus.com/inward/record.uri?eid=2-s2.0-](https://www.scopus.com/inward/record.uri?eid=2-s2.0-85102938343&doi=10.3389%2Ffnut.2021.645349&partnerID=40&md5=65acfb958cad416bfc974c83ba97fb41)  
1045 [85102938343&doi=10.3389%2Ffnut.2021.645349&partnerID=40&md5=65acfb958cad416bfc97](https://www.scopus.com/inward/record.uri?eid=2-s2.0-85102938343&doi=10.3389%2Ffnut.2021.645349&partnerID=40&md5=65acfb958cad416bfc974c83ba97fb41)  
1046 [4c83ba97fb41](https://www.scopus.com/inward/record.uri?eid=2-s2.0-85102938343&doi=10.3389%2Ffnut.2021.645349&partnerID=40&md5=65acfb958cad416bfc974c83ba97fb41)
- 1047 98. McCarthy S, Thomas S, Pitt H, Daube M, Cassidy R. ‘It’s a tradition to go down to the pokies  
1048 on your 18th birthday’ – the normalisation of gambling for young women in Australia. *Aust N Z J*  
1049 *Public Health* [Internet]. 2020;44:376–81. Available from:  
1050 [https://www.scopus.com/inward/record.uri?eid=2-s2.0-85091146395&doi=10.1111%2F1753-](https://www.scopus.com/inward/record.uri?eid=2-s2.0-85091146395&doi=10.1111%2F1753-6405.13024&partnerID=40&md5=7092d70312d7104b43a715943a9c898b)  
1051 [6405.13024&partnerID=40&md5=7092d70312d7104b43a715943a9c898b](https://www.scopus.com/inward/record.uri?eid=2-s2.0-85091146395&doi=10.1111%2F1753-6405.13024&partnerID=40&md5=7092d70312d7104b43a715943a9c898b)
- 1052 99. Maani N, Collin J, Friel S, Gilmore AB, McCambridge J, Robertson L, et al. The need for a  
1053 conceptual understanding of the macro and meso commercial determinants of health  
1054 inequalities. *Eur J Public Health* [Internet]. 2021;31:674–5. Available from:  
1055 [http://ovidsp.ovid.com/ovidweb.cgi?T=JS&PAGE=reference&D=emed22&NEWS=N&AN=63535](http://ovidsp.ovid.com/ovidweb.cgi?T=JS&PAGE=reference&D=emed22&NEWS=N&AN=635351225)  
1056 [1225](http://ovidsp.ovid.com/ovidweb.cgi?T=JS&PAGE=reference&D=emed22&NEWS=N&AN=635351225)
- 1057 100. Petticrew M, Maani N, Pettigrew L, Rutter H, Van Schalkwyk MCC, M. P, et al. Dark Nudges  
1058 and Sludge in Big Alcohol: Behavioral Economics, Cognitive Biases, and Alcohol Industry  
1059 Corporate Social Responsibility. *Milbank Quarterly* [Internet]. 2020;98:1290–328. Available  
1060 from: [http://onlinelibrary.wiley.com/journal/10.1111/\(ISSN\)1468-0009](http://onlinelibrary.wiley.com/journal/10.1111/(ISSN)1468-0009)
- 1061 101. Madden M, McCambridge J. Alcohol marketing versus public health: David and Goliath?  
1062 *Global Health*. 2021;17.

- 1063 102. Mialon M, Jaramillo Á, Caro P, Flores M, González L, Gutierrez-Gómez Y, et al. Involvement  
1064 of the food industry in nutrition conferences in Latin America and the Caribbean. *Public Health*  
1065 *Nutr.* 2021;24:1559–65.
- 1066 103. Maani N, van Schalkwyk MCI, Filippidis FT, Knai C, Petticrew M. Manufacturing doubt:  
1067 Assessing the effects of independent vs industry-sponsored messaging about the harms of fossil  
1068 fuels, smoking, alcohol, and sugar sweetened beverages. *SSM Popul Health* [Internet]. 2022;17.  
1069 Available from: [https://www.scopus.com/inward/record.uri?eid=2-s2.0-](https://www.scopus.com/inward/record.uri?eid=2-s2.0-85122512838&doi=10.1016%2Fj.ssmph.2021.101009&partnerID=40&md5=6bb81ee048201ee7b571dbfd0906fbae)  
1070 [85122512838&doi=10.1016%2Fj.ssmph.2021.101009&partnerID=40&md5=6bb81ee048201ee7](https://www.scopus.com/inward/record.uri?eid=2-s2.0-85122512838&doi=10.1016%2Fj.ssmph.2021.101009&partnerID=40&md5=6bb81ee048201ee7b571dbfd0906fbae)  
1071 [b571dbfd0906fbae](https://www.scopus.com/inward/record.uri?eid=2-s2.0-85122512838&doi=10.1016%2Fj.ssmph.2021.101009&partnerID=40&md5=6bb81ee048201ee7b571dbfd0906fbae)
- 1072 104. Passini CSM, Cavalcanti MB, Ribas SA, de Carvalho CMP, Bocca C, Lamarca F. Conflict of  
1073 Interests in the Scientific Production on Vitamin D and COVID-19: A Scoping Review. *Front*  
1074 *Public Health* [Internet]. 2022;10. Available from:  
1075 [https://www.scopus.com/inward/record.uri?eid=2-s2.0-](https://www.scopus.com/inward/record.uri?eid=2-s2.0-85134982503&doi=10.3389%2Ffpubh.2022.821740&partnerID=40&md5=18bd911940a964f74588d32277577685)  
1076 [85134982503&doi=10.3389%2Ffpubh.2022.821740&partnerID=40&md5=18bd911940a964f74](https://www.scopus.com/inward/record.uri?eid=2-s2.0-85134982503&doi=10.3389%2Ffpubh.2022.821740&partnerID=40&md5=18bd911940a964f74588d32277577685)  
1077 [588d32277577685](https://www.scopus.com/inward/record.uri?eid=2-s2.0-85134982503&doi=10.3389%2Ffpubh.2022.821740&partnerID=40&md5=18bd911940a964f74588d32277577685)
- 1078 105. Buse K, Mialon M, Jones A. Thinking Politically About UN Political Declarations: A Recipe  
1079 for Healthier Commitments—Free of Commercial Interests. *Int J Health Policy Manag* [Internet].  
1080 2022;11:1208–11. Available from: [https://www.scopus.com/inward/record.uri?eid=2-s2.0-](https://www.scopus.com/inward/record.uri?eid=2-s2.0-85135208447&doi=10.34172%2Fijhpm.2021.92&partnerID=40&md5=10f69f23f7b53b81a95bc3339f34f37f)  
1081 [85135208447&doi=10.34172%2Fijhpm.2021.92&partnerID=40&md5=10f69f23f7b53b81a95bc](https://www.scopus.com/inward/record.uri?eid=2-s2.0-85135208447&doi=10.34172%2Fijhpm.2021.92&partnerID=40&md5=10f69f23f7b53b81a95bc3339f34f37f)  
1082 [3339f34f37f](https://www.scopus.com/inward/record.uri?eid=2-s2.0-85135208447&doi=10.34172%2Fijhpm.2021.92&partnerID=40&md5=10f69f23f7b53b81a95bc3339f34f37f)
- 1083 106. Mently-Zambo Z, Raphael D, Taman A. Take the money and run: how food banks became  
1084 complicit with Walmart Canada’s hunger producing employment practices. *Crit Public Health*  
1085 [Internet]. 2021;00:1–12. Available from: <https://doi.org/10.1080/09581596.2021.1955828>
- 1086 107. Kenworthy NJ. Crowdfunding and global health disparities: an exploratory conceptual and  
1087 empirical analysis. *Global Health* [Internet]. 2019;15:71. Available from:  
1088 [https://www.scopus.com/inward/record.uri?eid=2-s2.0-](https://www.scopus.com/inward/record.uri?eid=2-s2.0-85075763795&doi=10.1186%2Fs12992-019-0519-1&partnerID=40&md5=741b59de63218030767d7780a71c1242)  
1089 [85075763795&doi=10.1186%2Fs12992-019-0519-](https://www.scopus.com/inward/record.uri?eid=2-s2.0-85075763795&doi=10.1186%2Fs12992-019-0519-1&partnerID=40&md5=741b59de63218030767d7780a71c1242)  
1090 [1&partnerID=40&md5=741b59de63218030767d7780a71c1242](https://www.scopus.com/inward/record.uri?eid=2-s2.0-85075763795&doi=10.1186%2Fs12992-019-0519-1&partnerID=40&md5=741b59de63218030767d7780a71c1242)
- 1091 108. Wood B, McCoy D, Baker P, Williams O, Sacks G. The double burden of maldistribution: a  
1092 descriptive analysis of corporate wealth and income distribution in four unhealthy commodity  
1093 industries. *Crit Public Health* [Internet]. 2023 [cited 2023 Apr 20];33:135–47. Available from:  
1094 <https://www.tandfonline.com/doi/abs/10.1080/09581596.2021.2019681>
- 1095 109. Rochford C, Tenneti N, Moodie R. Reframing the impact of business on health: The  
1096 interface of corporate, commercial, political and social determinants of health. *BMJ Glob Health*  
1097 [Internet]. 2019 [cited 2021 Sep 16];4:e001510. Available from:  
1098 [https://www.scopus.com/inward/record.uri?eid=2-s2.0-85071114198&doi=10.1136%2Fbmjgh-](https://www.scopus.com/inward/record.uri?eid=2-s2.0-85071114198&doi=10.1136%2Fbmjgh-2019-001510&partnerID=40&md5=c068de6a0e6ebfc5a2664a4c3bf45450)  
1099 [2019-001510&partnerID=40&md5=c068de6a0e6ebfc5a2664a4c3bf45450](https://www.scopus.com/inward/record.uri?eid=2-s2.0-85071114198&doi=10.1136%2Fbmjgh-2019-001510&partnerID=40&md5=c068de6a0e6ebfc5a2664a4c3bf45450)
- 1100 110. The Lancet. Unravelling the commercial determinants of health. In: Maani N, Pettigrew M,  
1101 Galea S, editors. *The Lancet*. Oxford Univ Press; 2023. p. 1131.
- 1102 111. Rose N, Reeve B, Charlton K. Barriers and Enablers for Healthy Food Systems and  
1103 Environments: The Role of Local Governments. *Curr Nutr Rep* [Internet]. 2022;11:82–93.  
1104 Available from:  
1105 [http://www.springer.com/new+%26+forthcoming+titles+%28default%29/journal/13668?chang](http://www.springer.com/new+%26+forthcoming+titles+%28default%29/journal/13668?changeHeader)  
1106 [eHeader](http://www.springer.com/new+%26+forthcoming+titles+%28default%29/journal/13668?changeHeader)

- 1107 112. Liber AC. Using Regulatory Stances to See All the Commercial Determinants of Health.  
1108 Milbank Quarterly [Internet]. 2022; Available from:  
1109 [http://onlinelibrary.wiley.com/journal/10.1111/\(ISSN\)1468-0009](http://onlinelibrary.wiley.com/journal/10.1111/(ISSN)1468-0009)  
1110 113. Loewenson R. Rethinking the Paradigm and Practice of Occupational Health in a World  
1111 Without Decent Work: A Perspective From East and Southern Africa. *New Solutions* [Internet].  
1112 2021;31:107–12. Available from:  
1113 <http://ovidsp.ovid.com/ovidweb.cgi?T=JS&PAGE=reference&D=emed22&NEWS=N&AN=63510>  
1114 2021  
1115 114. Montiel I, Park J, Husted BW, Velez-Calle A. Tracing the connections between international  
1116 business and communicable diseases. *J Int Bus Stud* [Internet]. 2022; Available from:  
1117 <https://www.scopus.com/inward/record.uri?eid=2-s2.0->  
1118 [85126885873&doi=10.1057%2Fs41267-022-00512-](https://www.scopus.com/inward/record.uri?eid=2-s2.0-85126885873&doi=10.1057%2Fs41267-022-00512-y&partnerID=40&md5=d0e830c2680d8f506200dc887087b27d)  
1119 [y&partnerID=40&md5=d0e830c2680d8f506200dc887087b27d](https://www.scopus.com/inward/record.uri?eid=2-s2.0-85126885873&doi=10.1057%2Fs41267-022-00512-y&partnerID=40&md5=d0e830c2680d8f506200dc887087b27d)  
1120 115. consumer. Cambridge Dictionary.  
1121 116. worker. Cambridge Dictionary.  
1122 117. Appendix E to Part 26 - Individual Determinations of Social and Economic Disadvantage  
1123 [Internet]. U.S. Department of Transportation. [cited 2023 Nov 5]. Available from:  
1124 [https://www.transportation.gov/civil-rights/appendix-e-part-26-individual-determinations-](https://www.transportation.gov/civil-rights/appendix-e-part-26-individual-determinations-social-and-economic-disadvantage)  
1125 [social-and-economic-disadvantage](https://www.transportation.gov/civil-rights/appendix-e-part-26-individual-determinations-social-and-economic-disadvantage)  
1126 118. Frank J, Mustard C, Smith P, Siddiqi A, Cheng Y, Burdorf A, et al. Work as a social  
1127 determinant of health in high-income countries: past, present, and future. *The Lancet*  
1128 [Internet]. 2023;402:1357–67. Available from: <http://dx.doi.org/10.1016/S0140->  
1129 [6736\(23\)00871-1](http://dx.doi.org/10.1016/S0140-6736(23)00871-1)  
1130 119. Eisenberg-Guyot J, Prins SJ, Muntaner C. Free agents or cogs in the machine? Classed,  
1131 gendered, and racialized inequities in hazardous working conditions. *Am J Ind Med*.  
1132 2022;65:92–104.  
1133 120. Mohai P, Pellow D, Roberts JT. Environmental justice. *Annu Rev Environ Resour*.  
1134 2009;34:405–30.  
1135 121. DuPont-Reyes MJ, Hernandez-Munoz JJ, Tang L. TV Advertising, Corporate Power, and  
1136 Latino Health Disparities. *Am J Prev Med* [Internet]. 2022;63:496–504. Available from:  
1137 <https://www.scopus.com/inward/record.uri?eid=2-s2.0->  
1138 [85132157505&doi=10.1016%2Fj.amepre.2022.04.017&partnerID=40&md5=fcb2ff4891b741d8](https://www.scopus.com/inward/record.uri?eid=2-s2.0-85132157505&doi=10.1016%2Fj.amepre.2022.04.017&partnerID=40&md5=fcb2ff4891b741d8)  
1139 [8f37c7b64fc9c47e](https://www.scopus.com/inward/record.uri?eid=2-s2.0-85132157505&doi=10.1016%2Fj.amepre.2022.04.017&partnerID=40&md5=fcb2ff4891b741d8)  
1140 122. N. R, B. R, Charlton K. AO - Rose NO <https://orcid.org/0000-0002-2640-0198>, Rose N,  
1141 Reeve B, Charlton K. Barriers and Enablers for Healthy Food Systems and Environments: The  
1142 Role of Local Governments. *Curr Nutr Rep* [Internet]. 2022;11:82–93. Available from:  
1143 <https://www.scopus.com/inward/record.uri?eid=2-s2.0->  
1144 [85124667572&doi=10.1007%2Fs13668-022-00393-](https://www.scopus.com/inward/record.uri?eid=2-s2.0-85124667572&doi=10.1007%2Fs13668-022-00393-5&partnerID=40&md5=24fc56940ecb34b55442d31adfd30a81)  
1145 [5&partnerID=40&md5=24fc56940ecb34b55442d31adfd30a81](https://www.scopus.com/inward/record.uri?eid=2-s2.0-85124667572&doi=10.1007%2Fs13668-022-00393-5&partnerID=40&md5=24fc56940ecb34b55442d31adfd30a81)  
1146 123. Ireland R, Bunn C, Reith G, Philpott M, Capewell S, Boyland E, et al. Commercial  
1147 determinants of health: Advertising of alcohol and unhealthy foods during sporting events. *Bull*  
1148 *World Health Organ* [Internet]. 2019;97:290–5. Available from:  
1149 <https://www.who.int/bulletin/volumes/97/4/18-220087.pdf>

- 1150 124. Klein DE, Lima JM. The Prison Industrial Complex as a Commercial Determinant of Health.  
1151 Am J Public Health. 2021;111:1750–2.
- 1152 125. Hyder AA, Werbick M, Scannelli L, Paichadze N. The COVID-19 pandemic exposes another  
1153 commercial determinant of health: The global firearm industry. Glob Health Sci Pract [Internet].  
1154 2021;9:264–7. Available from: [www.ghspjournal.org](http://www.ghspjournal.org)
- 1155 126. Jamieson L, Kearns C, Ankeny R, Hedges J, Thomson WMM, L. J, et al. Neoliberalism and  
1156 Indigenous oral health inequalities: a global perspective. Community Dent Health [Internet].  
1157 2021;38:44–7. Available from:  
1158 <http://ovidsp.ovid.com/ovidweb.cgi?T=JS&PAGE=reference&D=emed22&NEWS=N&AN=63414>  
1159 1422
- 1160 127. Diderichsen F, Dahlgren G, Whitehead M. Beyond “commercial determinants”: Shining a  
1161 light on privatization and political drivers of health inequalities. Eur J Public Health [Internet].  
1162 2021;31:672–3. Available from:  
1163 <http://ovidsp.ovid.com/ovidweb.cgi?T=JS&PAGE=reference&D=emed22&NEWS=N&AN=63535>  
1164 1125
- 1165 128. Hill SE, Johns P, Nakkash RT, Collin J. From silos to policy coherence: tobacco control,  
1166 unhealthy commodity industries and the commercial determinants of health. Tob Control  
1167 [Internet]. 2022;31:322–7. Available from: [https://www.scopus.com/inward/record.uri?eid=2-](https://www.scopus.com/inward/record.uri?eid=2-s2.0-85125691950&doi=10.1136%2Ftobaccocontrol-2021-057136&partnerID=40&md5=eaf9dd75ae1ce88ae3e426ec832340ba)  
1168 [s2.0-85125691950&doi=10.1136%2Ftobaccocontrol-2021-](https://www.scopus.com/inward/record.uri?eid=2-s2.0-85125691950&doi=10.1136%2Ftobaccocontrol-2021-057136&partnerID=40&md5=eaf9dd75ae1ce88ae3e426ec832340ba)  
1169 [057136&partnerID=40&md5=eaf9dd75ae1ce88ae3e426ec832340ba](https://www.scopus.com/inward/record.uri?eid=2-s2.0-85125691950&doi=10.1136%2Ftobaccocontrol-2021-057136&partnerID=40&md5=eaf9dd75ae1ce88ae3e426ec832340ba)
- 1170 129. Boatwright M, Lawrence M, Russell C, Russ K, McCoy D, Baker P. The Politics of Regulating  
1171 Foods for Infants and Young Children: A Case Study on the Framing and Contestation of Codex  
1172 Standard-Setting Processes on Breast-Milk Substitutes. Int J Health Policy Manag [Internet].  
1173 2022;11:2422–39. Available from:  
1174 <http://ovidsp.ovid.com/ovidweb.cgi?T=JS&PAGE=reference&D=emexa&NEWS=N&AN=6369750>  
1175 55
- 1176 130. McCambridge J, Coleman R, McEachern J. Public health surveillance studies of alcohol  
1177 industry market and political strategies: A systematic review. J Stud Alcohol Drugs [Internet].  
1178 2019 [cited 2023 Feb 20];80:149–57. Available from:  
1179 <https://www.jsad.com/doi/10.15288/jsad.2019.80.149>
- 1180 131. Legg T, Hatchard J, Gilmore AB. The Science for Profit Model—How and why corporations  
1181 influence science and the use of science in policy and practice. PLoS One [Internet]. 2021 [cited  
1182 2023 Feb 20];16:e0253272. Available from:  
1183 <https://journals.plos.org/plosone/article?id=10.1371/journal.pone.0253272>
- 1184 132. World Benchmarking Alliance. Methodology for the Food and Agriculture Benchmark.  
1185 2021;
- 1186 133. Sacks G, Vanderlee L, Robinson E, Vandevijvere S, Cameron AJ, Ni Mhurchu C, et al. BIA-  
1187 Obesity (Business Impact Assessment—Obesity and population-level nutrition): A tool and  
1188 process to assess food company policies and commitments related to obesity prevention and  
1189 population nutrition at the national level. Obesity Reviews. 2019;20:78–89.
- 1190 134. Robertson C. The Money Blind: How to Stop Industry Bias in Biomedical Science, Without  
1191 Violating the First Amendment. American Journal of Law and Medicine 358 [Internet]. 2011;  
1192 Available from: [https://scholarship.law.bu.edu/faculty\\_scholarship/1117](https://scholarship.law.bu.edu/faculty_scholarship/1117)

1193 135. Israel BA, Schulz AJ, Parker EA, Becker AB. Community-based participatory research: Policy  
1194 recommendations for promoting a partnership approach in health research. *Education for*  
1195 *Health*. 2001;14:182–97.  
1196
